# Supplementary material for: Phosphine-catalyzed formal Buchner [6+1] annulation: de novo construction of cycloheptatrienes
Source: Royal Society of Chemistry journal article supplement (doi:10.1039/d3cc04905a), 2023-01-01
Supplement: d3cc04905a1.pdf [file d3cc04905a1.pdf]

## Supporting Information

### Phosphine-catalyzed Formal Buchner [6+1] Annulation: De Novo

### Construction of Cycloheptatrienes

Jingxiong Lai<sup>†</sup>, You Huang<sup>\*,†</sup>

<sup>†</sup>State Key Laboratory and Institute of Elemento-Organic Chemistry, College of Chemistry,  
Nankai University, Tianjin 300071, China

Email: [hyou@nankai.edu.cn](mailto:hyou@nankai.edu.cn)

## Table of Contents

|                                                                                              |    |
|----------------------------------------------------------------------------------------------|----|
| 1. General Information.....                                                                  | 1  |
| 2. General Procedure of Starting Material .....                                              | 2  |
| 3. Optimization of Reaction Conditions .....                                                 | 7  |
| 4. General Procedure for New Products 3 .....                                                | 8  |
| 5. Primary Attempt on Asymmetric Edition in the Presence of Chiral Phosphine Catalysts ..... | 8  |
| 6. Scale-up Experiment.....                                                                  | 22 |
| 7. Control and Deuterium-labeling Experiments.....                                           | 22 |
| 8. Characterization Data of New Products <b>3</b> .....                                      | 27 |
| 9. Spectra .....                                                                             | 38 |
| 10. X-Ray Crystallography Data of <b>3sa</b> .....                                           | 77 |
| 11. References.....                                                                          | 78 |

## 1. General Information

Commercial reagents and solvents were used as received without further purification, unless otherwise stated. Unless otherwise specified, reactions at 60 °C have been performed using the pre-heated water-bath or the pre-heated oil-bath maintained at 60 °C. Yields referred to isolated compounds through preparative TLC. <sup>1</sup>H NMR, <sup>13</sup>C NMR spectra were recorded on a Bruker Avance 400 (400 MHz) spectrometer. And <sup>19</sup>F NMR were reported on a Bruker Avance (376 MHz) spectrometer. Chemical shifts for protons are reported in ppm and are referenced to the NMR solvent peak (CDCl<sub>3</sub>: δ 7.26 ppm, D). Chemical shifts for carbons are reported in ppm and are referenced to the carbon resonances of the NMR solvent peak (CDCl<sub>3</sub>: δ 77.06 ppm). Multiplicity was indicated as follows: s (singlet), d (doublet), t (triplet), q (quartet), dd (doublet of doublet), brs (broad singlet) and m (multiplet). Enantiomeric excesses of the cycloheptatrienes products were determined by Agilent 6890 chiral-phase high performance liquid chromatography (HPLC) or LabAlliance PC2001, using chiralcel AD-H, OD-H, and ID-H. High resolution mass spectrometry (HRMS) were obtained on Q Exactive Focus or Agilent 6520 Q-TOF LC/MS with ESI resource. Melting points were measured on a RY-I apparatus and reported uncorrected.

## 2. General Procedure of Starting Material

### 2.1. The substrates examined in this report.

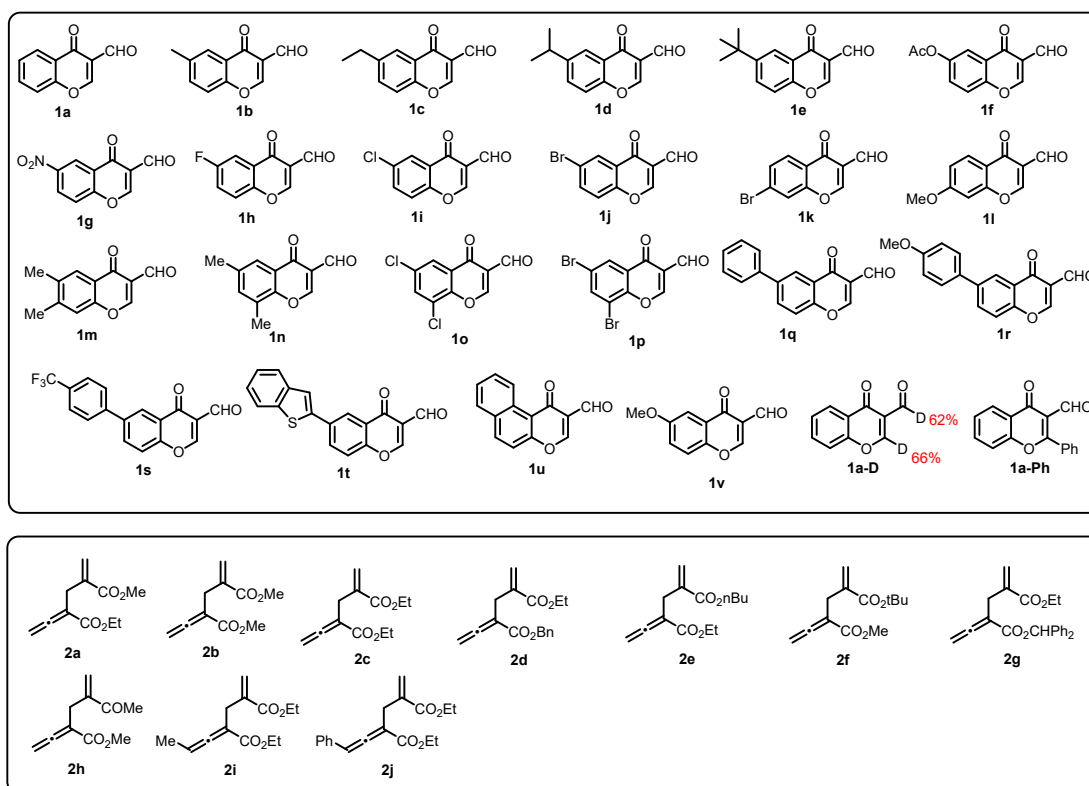

The substituted 4-oxo-4H-chromene-3-carbaldehyde **1a-1v** [1], **1a-Ph** are known compounds, and their NMR data were identical with the literature. **1a-D** was prepared following the synthetic method according to the reported literature procedures [2]. The  $\alpha$ -activated-allylic substituted allenoates **2a-2j** were prepared following the synthetic method according to the reported literature procedures [3].

### 2.2. General Procedure for substituted 3-formylchromones 1a-D:

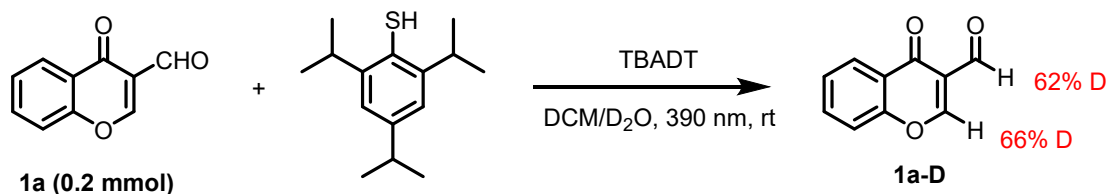

To a 10 mL glass vial was added TBADT (40.8 mg, 0.012 mmol, 4 mol %), aldehyde (0.3 mmol,

1.0 equiv), thiol (28 mg, 0.12 mmol, 40 mol %) and DCM/D<sub>2</sub>O (1:1, v/v; 3.0 mL). The reaction mixture was degassed by bubbling with argon for 15 s with an outlet needle and the vial was sealed with PTFE cap. The mixture was then stirred rapidly and irradiated with a 36 W 390 nm LED (approximately 2 cm away from the light source) at room temperature for 4 days. The reaction mixture was diluted with 10 mL of aqueous 1 M NaHCO<sub>3</sub> solution, and extracted with DCM (3 × 20 mL). The combined organic extracts were washed with brine (40 mL), dried over Na<sub>2</sub>SO<sub>4</sub>, and concentrated in vacuo. Purification of the crude product by flash chromatography

on silica gel using the indicated solvent system afforded the desired product as a white solid (27 mg, 52% yield).

$^1\text{H NMR}$  (400 MHz,  $\text{CDCl}_3$ )  $\delta$  10.38 (s, 0.38H), 8.54 (s, 0.34H), 8.29 (d,  $J = 7.2$  Hz, 1H), 7.75 (t,  $J = 7.2$  Hz, 1H), 7.51 (dd,  $J = 17.3, 8.2$  Hz, 2H).

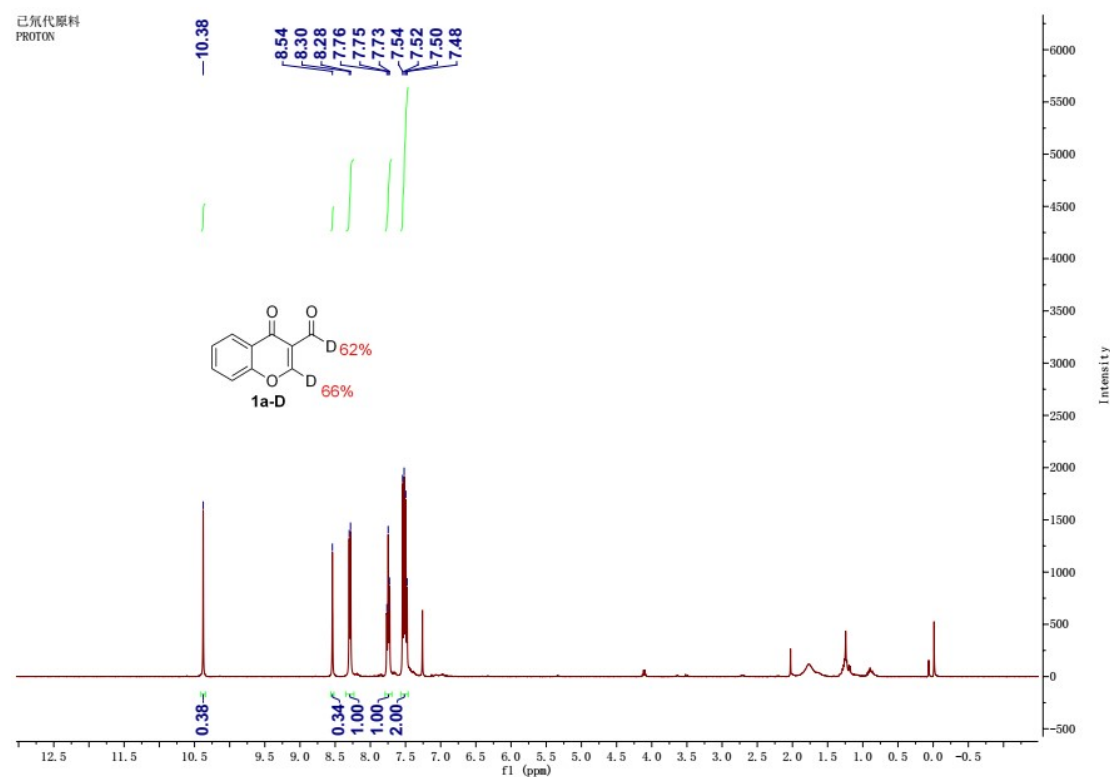

### 2.3. General Procedure for $\alpha$ -activated-allylic substituted allenoates **2a-2g**:

Allenoates **2a-2f** were prepared according to the reported methods described in the literature<sup>[4]</sup>

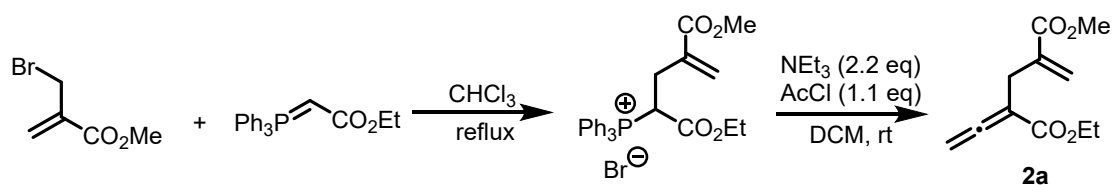

#### Allenoate **2a**:

To a stirred solution of (carbethoxymethylene)triphenylphosphorane (20.89 g, 60 mmol) in chloroform (250 mL) was added 1.0 eq of methyl 2-(bromomethyl)acrylate (10.74 g, 60 mmol) in an oven-dried 500 mL glass vial at room temperature. The reaction mixture was refluxed until methyl 2-(bromomethyl)acrylate (monitored by TLC) was disappeared. The solvent was evaporated under reduced pressure. To the resulting phosphonium salt was added dichloromethane (300 mL) and 2.2 eq of triethylamine (17 mL, 132 mmol). After stirred for about 1 hr, 1.1 eq of acetyl chloride (5.4 mL, 66 mmol) was added dropwise over 30 min. Then the reaction mixture was allowed to be stirred overnight. The resulting mixture was poured into a Buchner funnel that was packed with silica gel and was washed with dichloromethane for several times. The combined filtrate was carefully concentrated and the residue was subjected to a flash column chromatography (petroleum ether : ethyl acetate = 20:1) to provide allenoate **2a** as a colorless oil (7.5 g, 60 mmol, 60% yield).

**<sup>1</sup>H NMR (400 MHz, CDCl<sub>3</sub>)** δ 6.17 (s, 1H), 5.57 (s, 1H), 5.06 (t, *J* = 2.8 Hz, 2H), 4.14 (q, *J* = 7.1 Hz, 2H), 3.68 (s, 3H), 3.21 (s, 2H), 1.21 (t, *J* = 7.1 Hz, 3H);  
**<sup>13</sup>C NMR (101 MHz, CDCl<sub>3</sub>)** δ 213.97, 166.83, 166.33, 137.16, 126.61, 98.09, 79.31, 60.96, 51.70, 30.81, 14.03;  
**HRMS (ESI):** *m/z* calcd for C<sub>11</sub>H<sub>15</sub>O<sub>4</sub> ([M+H]<sup>+</sup>): 211.0965; found: 211.0963.

**Allenoate 2b:**

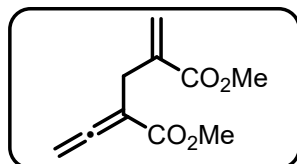

The general procedure outlined above was followed (30 mmol scale, using 1.0 eq of methyl (triphenylphosphoranylidene)acetate). Allenoate **2b** was formed as a colorless oil (3.3 g, 30 mmol, 56% yield).

**<sup>1</sup>H NMR (400 MHz, CDCl<sub>3</sub>)** δ 6.19 (s, 1H), 5.59 (s, 1H), 5.10 (t, *J* = 2.7 Hz, 2H), 3.70 (s, 6H), 3.22 (s, 2H).  
**<sup>13</sup>C NMR (101 MHz, CDCl<sub>3</sub>)** δ 214.21, 166.91, 137.15, 126.81, 97.93, 79.50, 52.24, 51.83, 30.94.  
**HRMS (ESI):** *m/z* calcd for C<sub>10</sub>H<sub>13</sub>O<sub>4</sub> ([M+H]<sup>+</sup>): 197.0809; found: 197.0809.

**Allenoate 2c:**

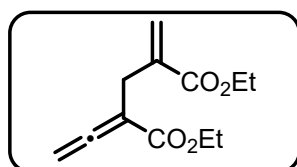

The general procedure outlined above was followed (30 mmol scale, using 1.0 eq of ethyl 2-(bromomethyl)acrylate). Allenoate **2c** was formed as a colorless oil (4.5 g, 30 mmol, 67% yield).  
**<sup>1</sup>H NMR (400 MHz, CDCl<sub>3</sub>)** δ 6.20 (s, 1H), 5.57 (s, 1H), 5.09 (t, *J* = 2.8 Hz, 2H), 4.17 (m, 4H), 3.24 (s, 2H), 1.25 (m, 6H);  
**<sup>13</sup>C NMR (101 MHz, CDCl<sub>3</sub>)** δ 214.14, 166.47, 166.43, 144.87, 122.97, 97.45, 79.97, 61.42, 60.40, 31.29, 14.34, 14.32.  
**HRMS (ESI):** *m/z* calcd for C<sub>12</sub>H<sub>17</sub>O<sub>4</sub> ([M+H]<sup>+</sup>): 225.1121; found: 225.1120.

**Allenoate 2d:**

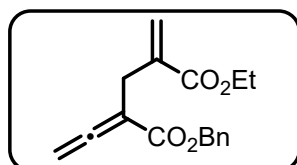

The general procedure outlined above was followed (using 30 mmol ethyl 2-(bromomethyl)acrylate and 1.0 eq benzyl 2-(triphenylphosphoranylidene)acetate). Allenoate **2d** was formed as a colorless oil (4.8 g, 30 mmol, 56% yield);  
**<sup>1</sup>H NMR (400 MHz, CDCl<sub>3</sub>)** δ 7.37 – 7.30 (m, 5H), 6.24 (s, 1H), 5.61 (d, *J* = 0.9 Hz, 1H), 5.19 (s, 2H),

5.14 (t,  $J = 2.8$  Hz, 2H), 4.23 – 4.16 (m, 2H), 3.29 (s, 2H), 1.27 (t,  $J = 7.1$  Hz, 3H).

$^{13}\text{C}$  NMR (101 MHz,  $\text{CDCl}_3$ )  $\delta$  214.43, 166.54, 166.44, 137.54, 136.01, 128.49, 128.08, 127.87, 126.63, 98.23, 79.71, 66.66, 60.75, 30.99, 14.19.

HRMS (ESI):  $m/z$  calcd for  $\text{C}_{17}\text{H}_{19}\text{O}_4$  ( $[\text{M}+\text{H}]^+$ ): 287.1278; found: 287.1274.

#### Allenolate 2e:

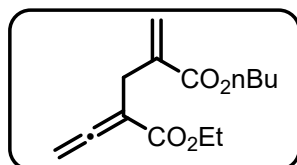

The general procedure outlined above was followed (30 mmol scale, using 1.0 eq of *N*-butyl 2-(bromomethyl)acrylate). Allenolate **2e** was formed as a colorless oil (4.26 g, 30 mmol, 56% yield).

$^1\text{H}$  NMR (400 MHz,  $\text{CDCl}_3$ )  $\delta$  6.19 (s, 1H), 5.56 (s, 1H), 5.08 (d,  $J = 1.2$  Hz, 2H), 4.08–4.18 (m, 4H), 3.22 (s, 2H), 1.66 – 1.54 (m, 2H), 1.41 – 1.29 (m, 2H), 1.27 – 1.19 (m, 3H), 0.93 – 0.85 (m, 3H);

$^{13}\text{C}$  NMR (101 MHz,  $\text{CDCl}_3$ )  $\delta$  214.07, 166.54, 166.47, 137.61, 126.39, 98.35, 79.42, 64.54, 61.05, 30.92, 30.59, 19.11, 14.15, 13.63;

HRMS (ESI):  $m/z$  calcd for  $\text{C}_{14}\text{H}_{21}\text{O}_4$  ( $[\text{M}+\text{H}]^+$ ): 253.1434; found: 253.1433.

#### Allenolate 2f:

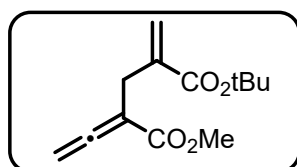

The general procedure outlined above was followed (using 23.8 mmol methyl 2-(bromomethyl)acrylate and 1.0 eq methyl (triphenylphosphoranylidene)acetate). Allenolate **2f** was formed as a colorless oil (2.16 g, 23.8 mmol, 37% yield);

$^1\text{H}$  NMR (400 MHz,  $\text{CDCl}_3$ )  $\delta$  6.08 (s, 1H), 5.48 (d,  $J = 1.3$  Hz, 1H), 5.07 (t,  $J = 2.9$  Hz, 2H), 3.69 (s, 3H), 3.18 (s, 2H), 1.42 (s, 9H);

$^{13}\text{C}$  NMR (101 MHz,  $\text{CDCl}_3$ )  $\delta$  214.08, 166.96, 165.58, 138.84, 125.58, 98.32, 80.52, 79.54, 52.17, 30.99, 27.91;

HRMS (ESI):  $m/z$  calcd for  $\text{C}_{13}\text{H}_{18}\text{O}_4\text{Na}$  ( $[\text{M}+\text{Na}]^+$ ): 261.1097; found: 261.1094.

#### Allenolate 2g:

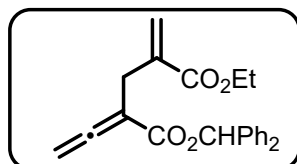

The general procedure outlined above was followed (using 40 mmol methyl 2-(bromomethyl)acrylate and 1.0 eq methyl (triphenylphosphoranylidene)acetate). Allenolate **2g** was formed as a colorless oil (4.14 g, 40 mmol, 29% yield);

**<sup>1</sup>H NMR (400 MHz, CDCl<sub>3</sub>)** δ 7.40 (d, *J* = 1.8 Hz, 1H), 7.38 (d, *J* = 1.1 Hz, 3H), 7.36 (d, *J* = 1.0 Hz, 1H), 7.34 (d, *J* = 1.7 Hz, 2H), 7.33 (d, *J* = 1.6 Hz, 1H), 7.30 (t, *J* = 1.7 Hz, 1H), 7.29 (t, *J* = 2.8 Hz, 1H), 6.94 (s, 1H), 6.25 (d, *J* = 0.5 Hz, 1H), 5.62 (d, *J* = 1.2 Hz, 1H), 5.24 (t, *J* = 2.8 Hz, 2H), 4.21 (q, *J* = 7.1 Hz, 2H), 3.34 (s, 2H), 1.28 (t, *J* = 7.1 Hz, 3H);

**<sup>13</sup>C NMR (101 MHz, CDCl<sub>3</sub>)** δ 214.62, 166.48, 165.55, 140.32, 137.46, 128.43, 127.80, 126.89, 126.60, 98.40, 79.67, 77.34, 60.70, 30.86, 14.13;

**HRMS (ESI):** *m/z* calcd for C<sub>23</sub>H<sub>22</sub>O<sub>4</sub>Na([M+Na]<sup>+</sup>): 385.1410; found: 385.1413.

#### Allenoate 2h:

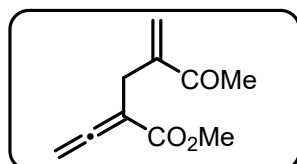

The general procedure outlined above was followed (using 40 mmol 3-(bromomethyl)but-3-en-2-one and 1.0 eq methyl (triphenylphosphoranylidene)acetate). Allenoate **2h** was formed as a colorless oil (0.7 g, 7.5 mmol, 52% yield);

**<sup>1</sup>H NMR (400 MHz, CDCl<sub>3</sub>)** δ 6.08 (s, 1H), 5.84 (s, 1H), 5.10 (t, *J* = 2.8 Hz, 2H), 3.73 (s, 3H), 3.22 (s, 2H), 2.32 (s, 3H);

**<sup>13</sup>C NMR (101 MHz, CDCl<sub>3</sub>)** δ 214.40, 198.76, 167.09, 145.78, 126.62, 98.17, 79.37, 52.32, 30.03, 25.83;

**HRMS (ESI):** *m/z* calcd for C<sub>10</sub>H<sub>13</sub>O<sub>3</sub> ([M+H]<sup>+</sup>): 181.0859; found: 181.0870.

#### Allenoate 2i:

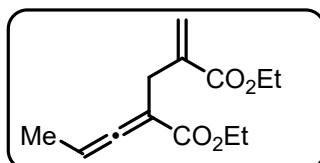

The general procedure outlined above was followed (using 40 mmol 3-(bromomethyl)but-3-en-2-one and 1.0 eq ethyl (triphenylphosphoranylidene)acetate). Allenoate **2i** was formed as a colorless oil (0.75 g, 10 mmol, 32% yield);

**<sup>1</sup>H NMR (400 MHz, CDCl<sub>3</sub>)** δ 6.18 (s, 1H), 5.57 (s, 1H), 5.52 – 5.41 (m, 1H), 4.17 (qd, *J* = 7.1, 2.7 Hz, 4H), 3.31 – 3.16 (m, 2H), 1.69 (d, *J* = 7.3 Hz, 3H), 1.26 (dd, *J* = 15.7, 7.2 Hz, 6H);

**<sup>13</sup>C NMR (101 MHz, CDCl<sub>3</sub>)** δ 210.89, 166.98, 166.64, 138.17, 126.10, 98.17, 90.52, 60.92, 60.65, 31.47, 14.25, 14.21, 13.01;

**HRMS (ESI):** *m/z* calcd for C<sub>13</sub>H<sub>19</sub>O<sub>4</sub> ([M+H]<sup>+</sup>): 239.1278; found: 239.1287.

#### Allenoate 2j:

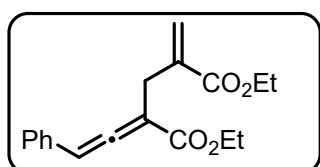



The general procedure outlined above was followed (using 40 mmol 3-(bromomethyl)but-3-en-2-one and 1.0 eq ethyl (triphenylphosphoranylidene)acetate). Allenoate **2j** was formed as a colorless oil (7 g, 40 mmol, 58% yield);

<sup>1</sup>H NMR (400 MHz, CDCl<sub>3</sub>) δ 6.53 (t, *J* = 2.6 Hz, 1H), 6.21 (s, 1H), 5.66 (s, 1H), 4.26 – 4.17 (m, 2H), 4.10 – 3.97 (m, 2H), 3.42 (ddd, *J* = 46.8, 15.9, 2.5 Hz, 2H), 1.25 (t, *J* = 7.1 Hz, 3H), 1.17 (t, *J* = 7.1 Hz, 3H);

<sup>13</sup>C NMR (101 MHz, CDCl<sub>3</sub>) δ 212.52, 166.42, 166.08, 137.63, 131.96, 128.68, 127.80, 127.36, 126.67, 102.54, 99.09, 61.25, 60.73, 31.69, 14.22, 14.02;

HRMS (ESI): *m/z* calcd for C<sub>18</sub>H<sub>21</sub>O<sub>4</sub> ([M+H]<sup>+</sup>): 301.1434; found: 301.1432.

### 3. Optimization of Reaction Conditions

Table S1. Optimization of reaction conditions.<sup>a</sup>

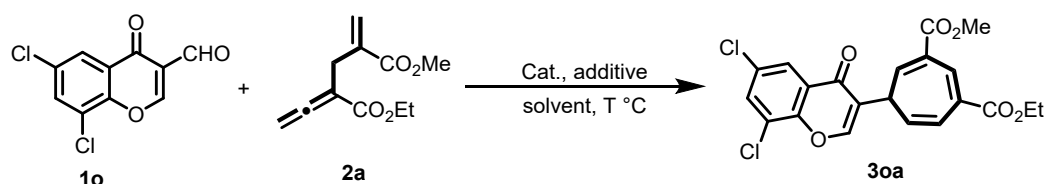

| entry               | cat.                                                 | additive                        | solvent           | yield (%) <sup>b</sup> |
|---------------------|------------------------------------------------------|---------------------------------|-------------------|------------------------|
| 1                   | PPh <sub>3</sub>                                     | -                               | toluene           | 32                     |
| 2                   | (4-MeOC <sub>6</sub> H <sub>4</sub> ) <sub>3</sub> P | -                               | toluene           | 51                     |
| 3                   | (4-FC <sub>6</sub> H <sub>4</sub> ) <sub>3</sub> P   | -                               | toluene           | trace                  |
| 4                   | PCy <sub>3</sub>                                     | -                               | toluene           | trace                  |
| 5                   | (4-MeOC <sub>6</sub> H <sub>4</sub> ) <sub>3</sub> P | -                               | ClPh              | 51                     |
| 6                   | (4-MeOC <sub>6</sub> H <sub>4</sub> ) <sub>3</sub> P | -                               | CHCl <sub>3</sub> | 59                     |
| 7                   | (4-MeOC <sub>6</sub> H <sub>4</sub> ) <sub>3</sub> P | -                               | THF               | NR                     |
| 8                   | (4-MeOC <sub>6</sub> H <sub>4</sub> ) <sub>3</sub> P | Cs <sub>2</sub> CO <sub>3</sub> | CHCl <sub>3</sub> | 30                     |
| 9                   | (4-MeOC <sub>6</sub> H <sub>4</sub> ) <sub>3</sub> P | PhCO <sub>2</sub> H             | CHCl <sub>3</sub> | 86                     |
| 10                  | (4-MeOC <sub>6</sub> H <sub>4</sub> ) <sub>3</sub> P | 4 Å MS                          | CHCl <sub>3</sub> | 50                     |
| 11 <sup>c</sup>     | (4-MeOC <sub>6</sub> H <sub>4</sub> ) <sub>3</sub> P | PhCO <sub>2</sub> H             | CHCl <sub>3</sub> | 89                     |
| 12 <sup>c,d</sup>   | (4-MeOC <sub>6</sub> H <sub>4</sub> ) <sub>3</sub> P | (PhCO <sub>2</sub> H            | CHCl <sub>3</sub> | 92                     |
| 13 <sup>c,d,e</sup> | (4-MeOC <sub>6</sub> H <sub>4</sub> ) <sub>3</sub> P | (L)-N-Ts-Proline                | CHCl <sub>3</sub> | 95                     |
| 14                  | -                                                    | PhCO <sub>2</sub> H             | CHCl <sub>3</sub> | 20                     |

<sup>a</sup>Reaction conditions, unless otherwise noted: 0.1 mmol **1o**, 0.2 mmol **2a**, 30 mol% Cat., 1.2 equiv. additive at 25 °C in solvent (2 mL) for 24 h. <sup>b</sup>Isoalted yield. <sup>c</sup>0.18 mmol **2a**. <sup>d</sup>60 °C. <sup>e</sup>(L)-N-Ts-Proline was used instead of PhCO<sub>2</sub>H.

### 4. General Procedure of New Products 3

#### Procedure A:

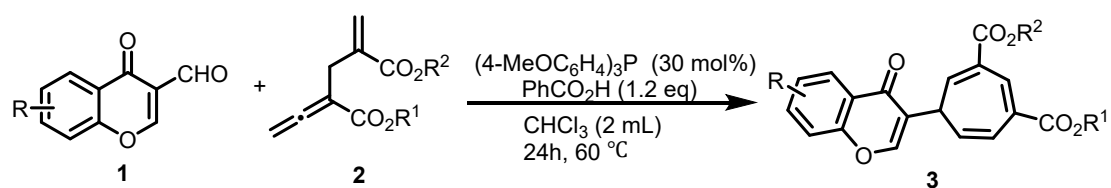

To an oven-dried 10 mL glass vial was added substituted 4-oxo-4H-chromene-3-carbaldehyde **1** (0.1 mmol), allenolate **2** (0.18 mmol), PhCO<sub>2</sub>H (0.12 mmol), (*p*-MeOC<sub>6</sub>H<sub>4</sub>)<sub>3</sub>P (0.3 eq) and 2.0 mL of CHCl<sub>3</sub>. The resulting mixture was stirred at 60 °C for 24 hours until the complete consumption of the starting materials monitored by TLC. After removal of CHCl<sub>3</sub>, the residue was diluted with ethyl acetate (2.0 mL) and washed with brine. The volatile was removed under reduced pressure and the residue was purified by preparative TLC (petroleum ether: ethyl acetate = 5:1) to afford **3**.

#### Procedure B:

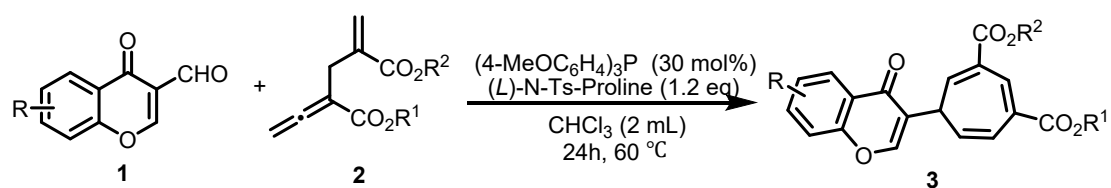

To an oven-dried 10 mL glass vial was added substituted 4-oxo-4H-chromene-3-carbaldehyde **1** (0.1 mmol), allenolate **2** (0.18 mmol), (*L*)-N-Ts-Proline (0.12 mmol), (*p*-MeOC<sub>6</sub>H<sub>4</sub>)<sub>3</sub>P (0.3 eq) and 2.0 mL of CHCl<sub>3</sub>. The resulting mixture was stirred at 60 °C for 24 hours until the complete consumption of the starting materials monitored by TLC. After removal of CHCl<sub>3</sub>, the residue was diluted with ethyl acetate (2.0 mL) and washed with brine. The volatile was removed under reduced pressure and the residue was purified by preparative TLC (petroleum ether: ethyl acetate = 5:1) to afford **3**.

## 5. Primary Attempt on Asymmetric Edition in the Presence of Chiral Phosphine Catalysts

### 5.1. Primary attempt on asymmetric edition

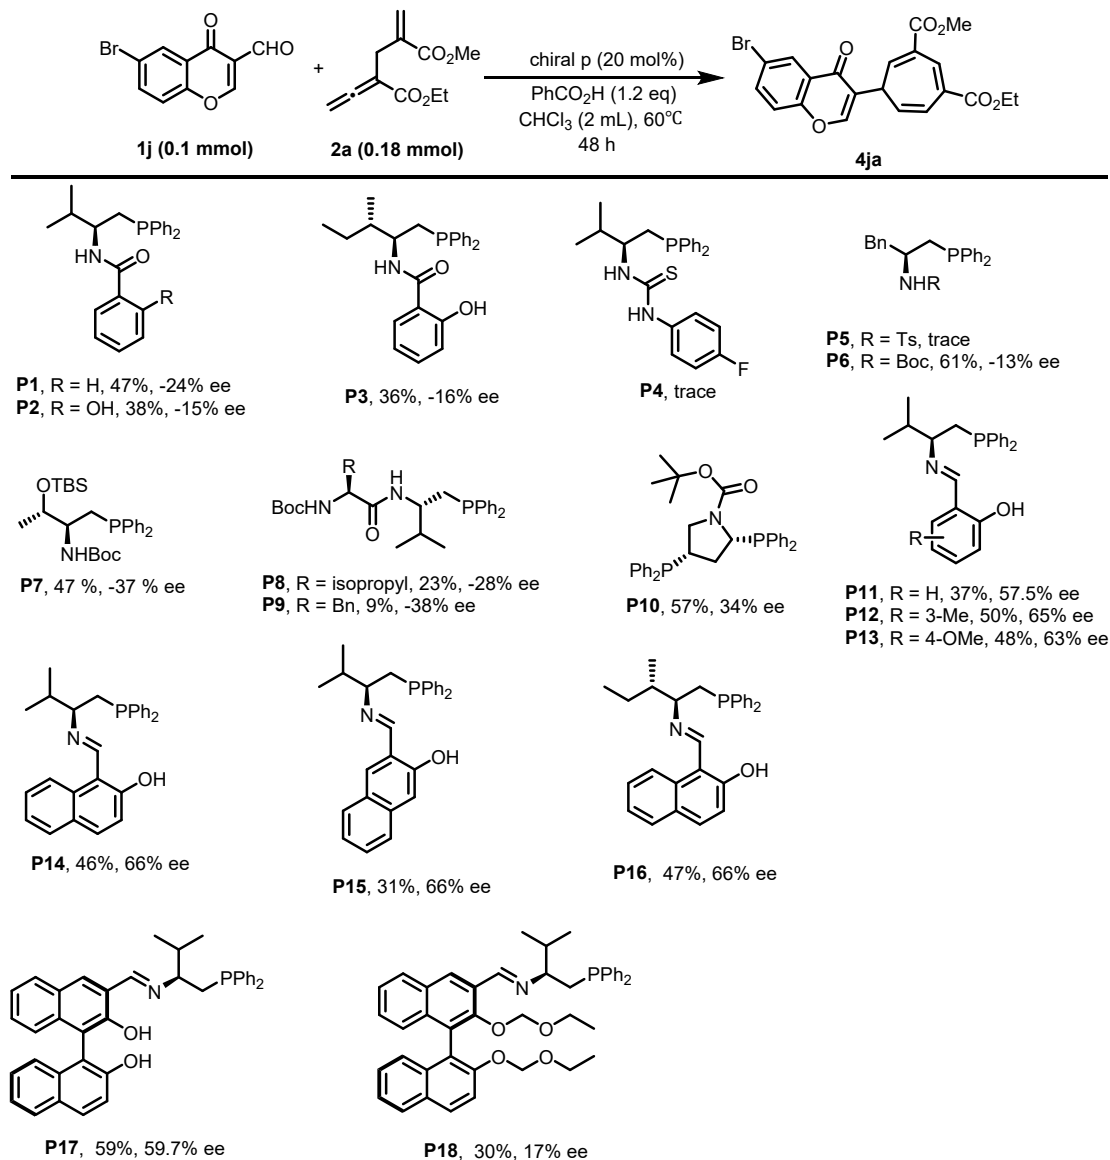

**Table S2. Optimization of an asymmetric version of [6+1] annulation<sup>a</sup>**

| entry    | Cat.                | Solvent                         | Temp(°C)  | Time      | Yield(%) <sup>b</sup> | ee(%) <sup>c</sup> |
|----------|---------------------|---------------------------------|-----------|-----------|-----------------------|--------------------|
| 1        | <b>P14</b> (0.3 eq) | CHCl <sub>3</sub> (2 mL)        | 60        | 48        | 34                    | 65                 |
| 2        | <b>P14</b> (0.4 eq) | CHCl <sub>3</sub> (2 mL)        | 60        | 48        | 49                    | 65                 |
| <b>3</b> | <b>P14</b> (0.4 eq) | <b>CHCl<sub>3</sub>(0.5 mL)</b> | <b>60</b> | <b>48</b> | <b>57</b>             | <b>66</b>          |
| 4        | <b>P14</b> (0.4 eq) | CHCl <sub>3</sub> (1 mL)        | 60        | 48        | 45                    | 66                 |
| 5        | <b>P14</b> (0.4 eq) | CHCl <sub>3</sub> (3 mL)        | 60        | 48        | 38                    | 66                 |
| 6        | <b>P14</b> (0.4 eq) | CHCl <sub>3</sub> (0.5 mL)      | 0         | 48        | -                     | -                  |
| 7        | <b>P14</b> (0.4 eq) | CHCl <sub>3</sub> (0.5 mL)      | 50        | 48        | 48                    | 42                 |

|    |                     |                            |    |    |    |    |
|----|---------------------|----------------------------|----|----|----|----|
| 8  | <b>P14</b> (0.4 eq) | CHCl <sub>3</sub> (0.5 mL) | 70 | 12 | 12 | 46 |
| 9  | <b>P14</b> (0.4 eq) | CHCl <sub>3</sub> (0.5 mL) | 80 | 12 | 48 | 66 |
| 10 | <b>P14</b> (0.4 eq) | CHCl <sub>3</sub> (0.5 mL) | 90 | 12 | 39 | 66 |

<sup>a</sup>Reaction conditions: **1** (0.1 mmol), **2** (0.18 mmol), PhCO<sub>2</sub>H (120 mol%) in CHCl<sub>3</sub> (x mL) at T °C;

<sup>b</sup>Yields of isolated products; <sup>c</sup>ee was determined by chiral HPLC.

## 5.2. General Procedure for Enantioselective version of New Products 4

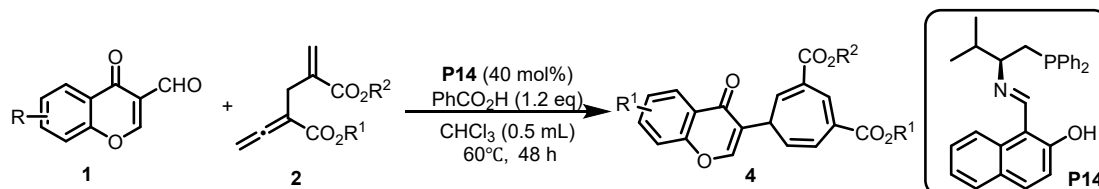

To an oven-dried 10 mL glass vial was added substituted 4-oxo-4H-chromene-3-carbaldehyde **1** (0.1 mmol), allenolate **2** (0.18 mmol), PhCO<sub>2</sub>H (0.12 mmol), **P14** (0.4 eq) and 0.5 mL of CHCl<sub>3</sub>. The resulting mixture was stirred at 60 °C for 48 hours until the complete consumption of the starting materials monitored by TLC. After removal of CHCl<sub>3</sub>, the residue was diluted with ethyl acetate (2.0 mL) and washed with brine. The volatile was removed under reduced pressure and the residue was purified by preparative TLC (petroleum ether: ethyl acetate = 5:1) to afford **4**. The ee was determined chiral HPLC analysis of the isolated products.

### Chiral product 4aa:

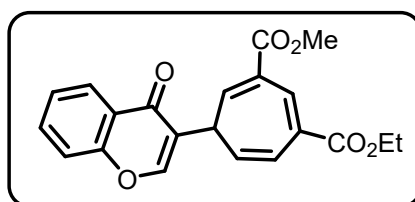

Purification by column chromatography on silica gel (petroleum ether: ethyl acetate = 5:1) afforded the compound **4aa** (21.3 mg, 55% yield) as a yellow oil. [ $\alpha$ ]<sub>D</sub><sup>25</sup> = +13 (c = 0.5, CHCl<sub>3</sub>). The ee value was 66%, *t<sub>r</sub>* (major) = 21.528 min, *t<sub>r</sub>* (minor) = 25.594 min (Chiralcel AD-H,  $\lambda$  = 220 nm, hexanes : *i*PrOH = 85:10, flow rate = 1.0 mL/min).

### <Chromatogram>

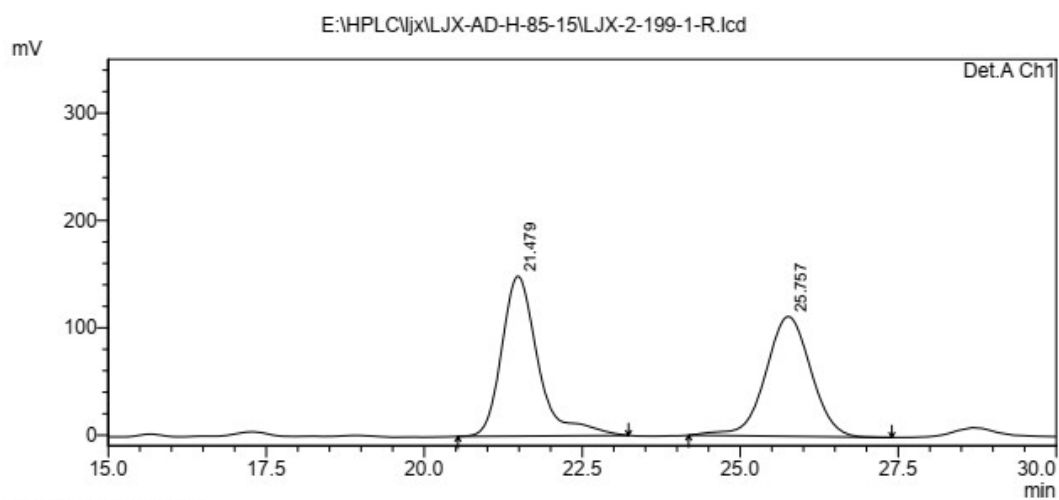

1 Det.A Ch1/254nm

PeakTable

Detector A Ch1 254nm

| Peak# | Ret. Time | Area     | Height | Area %  | Height % |
|-------|-----------|----------|--------|---------|----------|
| 1     | 21.479    | 5974025  | 148879 | 51.728  | 57.158   |
| 2     | 25.757    | 5575005  | 111591 | 48.272  | 42.842   |
| Total |           | 11549030 | 260470 | 100.000 | 100.000  |

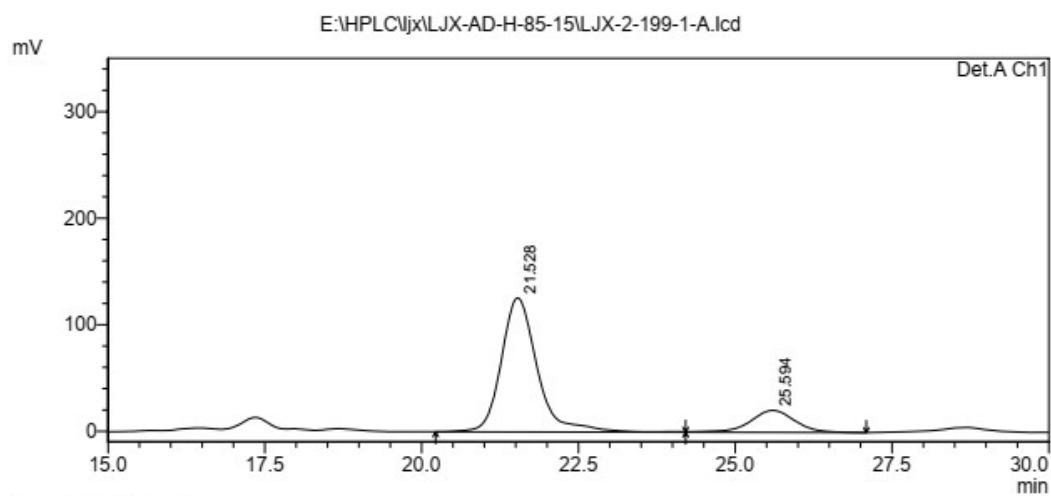

1 Det.A Ch1/254nm

PeakTable

Detector A Ch1 254nm

| Peak# | Ret. Time | Area    | Height | Area %  | Height % |
|-------|-----------|---------|--------|---------|----------|
| 1     | 21.528    | 5022154 | 125820 | 83.124  | 85.884   |
| 2     | 25.594    | 1019613 | 20680  | 16.876  | 14.116   |
| Total |           | 6041768 | 146500 | 100.000 | 100.000  |

### Chiral product 4da:

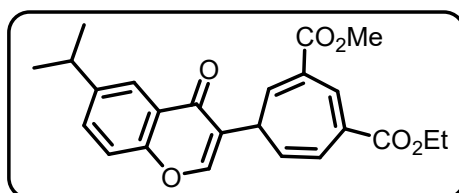

Purification by column chromatography on silica gel (petroleum ether: ethyl acetate = 5:1) afforded the compound **4da** (23.2 mg, 54% yield) as a yellow oil.  $[\alpha]_D^{25} = +0.6$  ( $c = 0.4$ ,  $\text{CHCl}_3$ ). The ee value was 51%,  $t_r$  (major) = 14.607 min,  $t_r$  (minor) = 18.604 min (Chiralcel AD-H,  $\lambda = 220$  nm, hexanes : *i*PrOH = 85 : 15, flow rate = 1.0 mL/min).

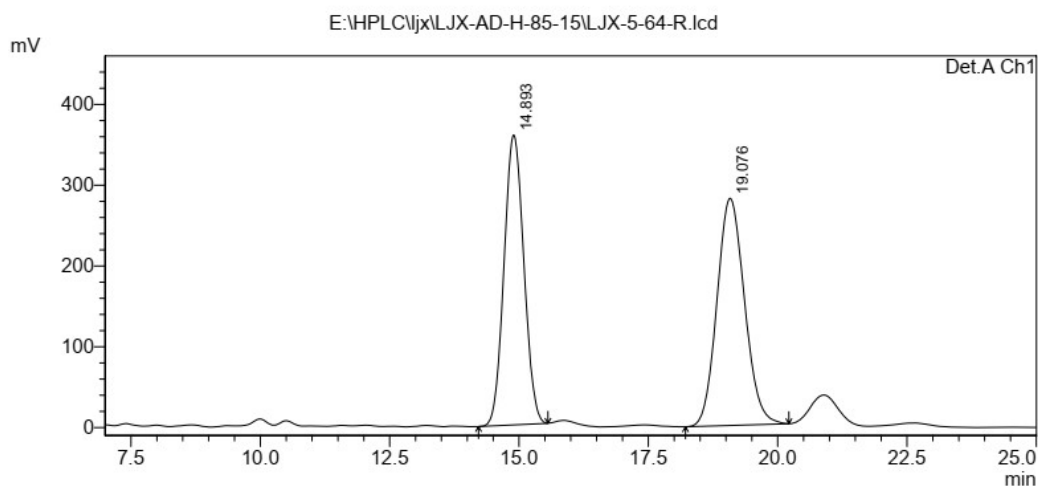

PeakTable

| Peak# | Ret. Time | Area     | Height | Area %  | Height % |
|-------|-----------|----------|--------|---------|----------|
| 1     | 14.893    | 9549744  | 359044 | 47.844  | 56.070   |
| 2     | 19.076    | 10410357 | 281302 | 52.156  | 43.930   |
| Total |           | 19960102 | 640346 | 100.000 | 100.000  |

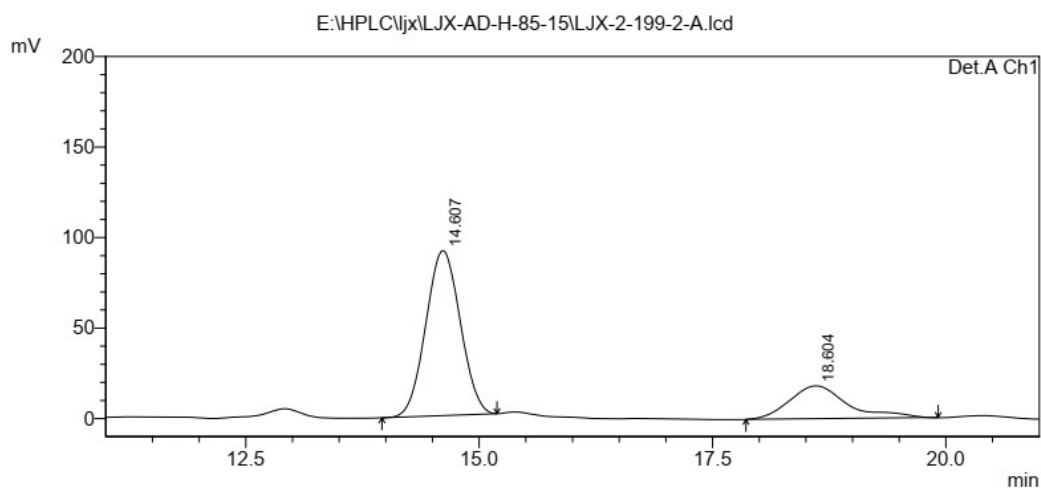

PeakTable

| Peak# | Ret. Time | Area    | Height | Area %  | Height % |
|-------|-----------|---------|--------|---------|----------|
| 1     | 14.607    | 2342562 | 91186  | 74.987  | 83.399   |
| 2     | 18.604    | 781376  | 18151  | 25.013  | 16.601   |
| Total |           | 3123938 | 109337 | 100.000 | 100.000  |

### Chiral product 4ha:

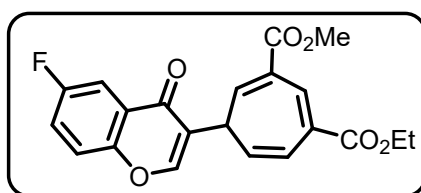

Purification by column chromatography on silica gel (petroleum ether: ethyl acetate = 5:1) afforded the compound **4ha** (23 mg, 68% yield) as a white solid.  $[\alpha]_{25}^D = +4.3$  ( $c = 0.7$ ,  $\text{CHCl}_3$ ). The ee value was 72.5%,  $t_R$  (major) = 24.628 min,  $t_R$  (minor) = 33.392 min (Chiralcel AD-H,  $\lambda = 220$  nm, hexanes : *i*PrOH = 85 : 15, flow rate = 1.0 mL/min).

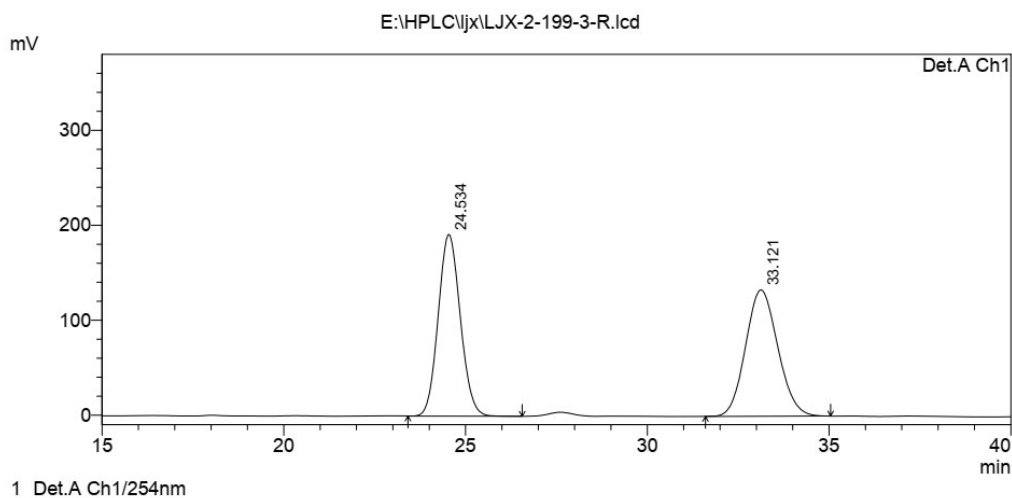

PeakTable

| Peak# | Ret. Time | Area     | Height | Area %  | Height % |
|-------|-----------|----------|--------|---------|----------|
| 1     | 24.534    | 8078997  | 191312 | 49.632  | 58.975   |
| 2     | 33.121    | 8198640  | 133084 | 50.368  | 41.025   |
| Total |           | 16277637 | 324396 | 100.000 | 100.000  |

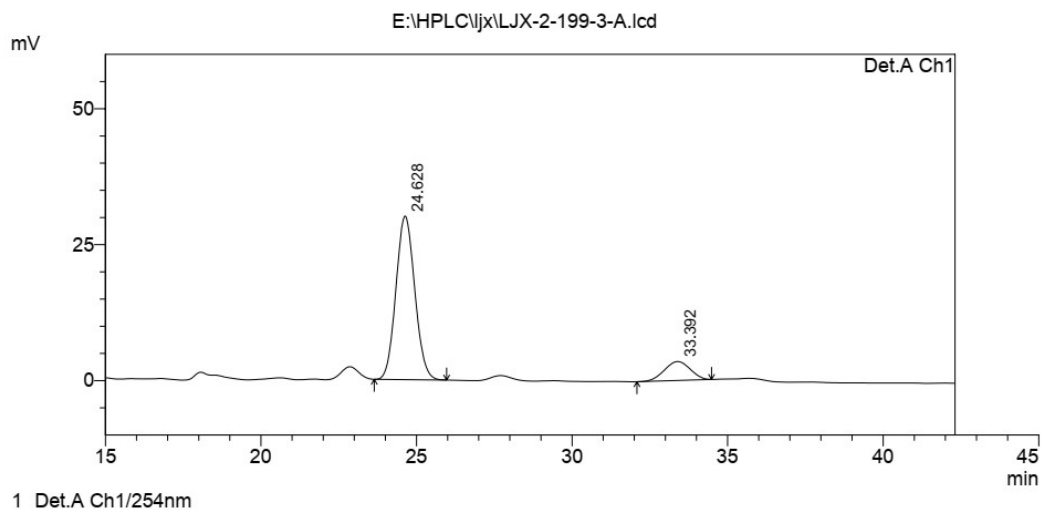

PeakTable

| Peak# | Ret. Time | Area    | Height | Area %  | Height % |
|-------|-----------|---------|--------|---------|----------|
| 1     | 24.628    | 1268687 | 30091  | 86.294  | 89.625   |
| 2     | 33.392    | 201503  | 3483   | 13.706  | 10.375   |
| Total |           | 1470191 | 33574  | 100.000 | 100.000  |

#### Chiral product 4ka:

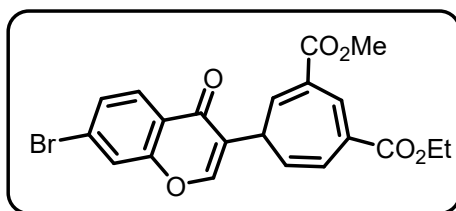

Purification by column chromatography on silica gel (petroleum ether: ethyl acetate = 5:1) afforded the compound **4ka** (28.2 mg, 61% yield) as a white solid.  $[\alpha]_{25}^D = +0.8$  ( $c = 1$ ,  $\text{CHCl}_3$ ). The ee value was 71%,  $t_R$  (major) = 27.957 min,  $t_R$  (minor) = 33.298 min (Chiralcel AD-H,  $\lambda = 220$  nm, hexanes : *i*PrOH = 85 : 15, flow rate = 1.0 mL/min).



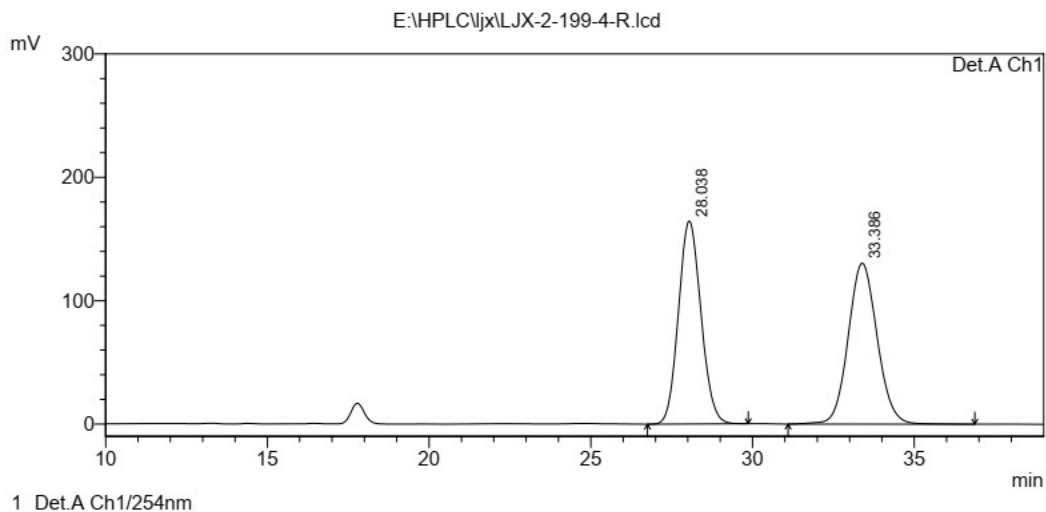

PeakTable

| Peak# | Ret. Time | Area     | Height | Area %  | Height % |
|-------|-----------|----------|--------|---------|----------|
| 1     | 28.038    | 7950628  | 164425 | 49.460  | 55.756   |
| 2     | 33.386    | 8124376  | 130478 | 50.540  | 44.244   |
| Total |           | 16075004 | 294903 | 100.000 | 100.000  |

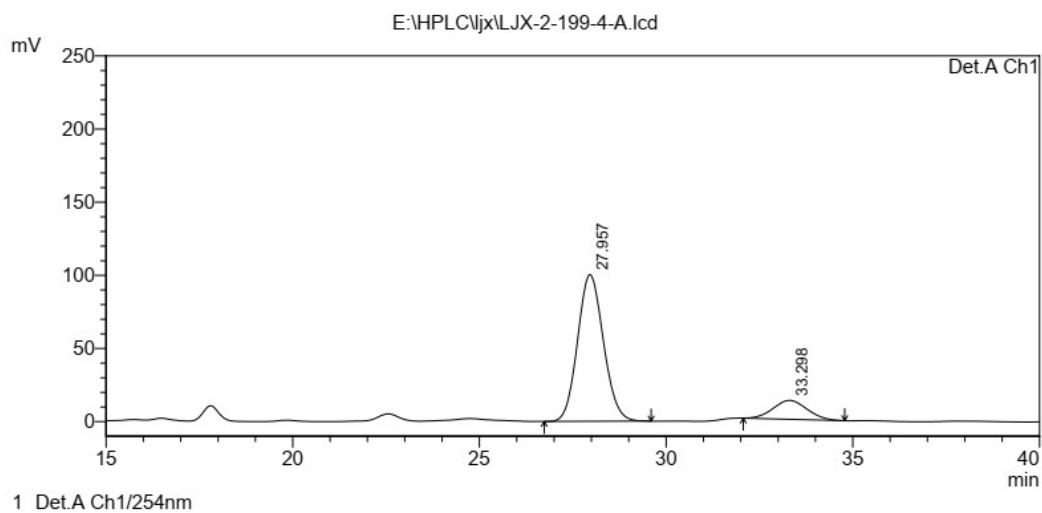

PeakTable

| Peak# | Ret. Time | Area    | Height | Area %  | Height % |
|-------|-----------|---------|--------|---------|----------|
| 1     | 27.957    | 4833414 | 100308 | 85.512  | 88.577   |
| 2     | 33.298    | 818918  | 12936  | 14.488  | 11.423   |
| Total |           | 5652332 | 113244 | 100.000 | 100.000  |

**Chiral product 40a:**

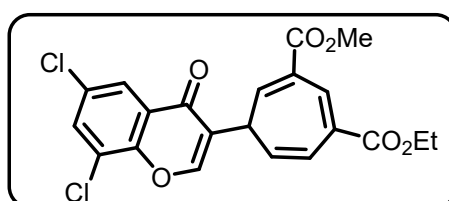

Purification by column chromatography on silica gel (petroleum ether: ethyl acetate = 5:1) afforded the compound **40a** (27.4 mg, 60% yield) as a white solid.  $[\alpha]_{25}^D = +6.7$  ( $c = 0.9$ ,  $\text{CHCl}_3$ ). The ee value was 67%,  $t_R$  (major) = 20.773 min,  $t_R$  (minor) = 23.775 min (Chiralcel AD-H,  $\lambda = 220$  nm, hexanes :  $i\text{PrOH} = 85 : 15$ , flow rate = 1.0 mL/min).

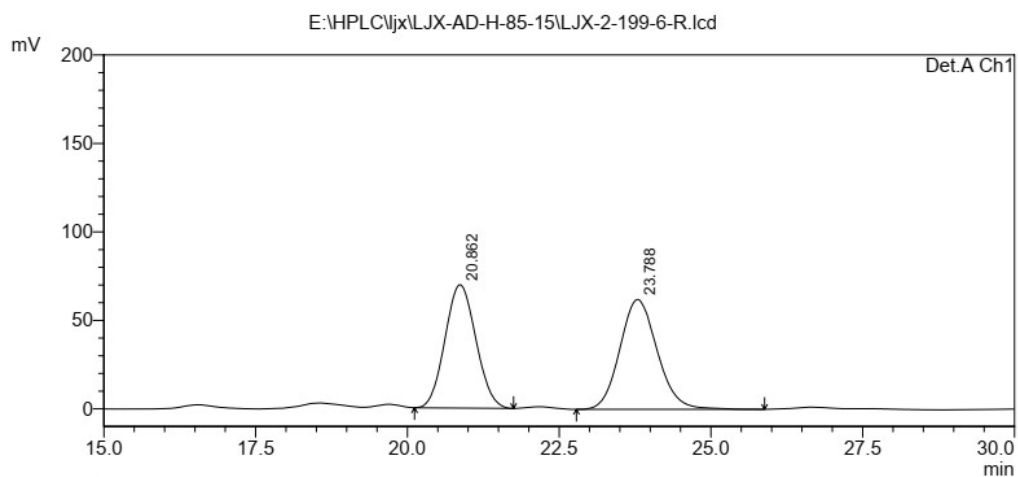

PeakTable

Detector A Ch1 254nm

| Peak# | Ret. Time | Area    | Height | Area %  | Height % |
|-------|-----------|---------|--------|---------|----------|
| 1     | 20.862    | 2468736 | 69759  | 48.099  | 52.892   |
| 2     | 23.788    | 2663927 | 62132  | 51.901  | 47.108   |
| Total |           | 5132664 | 131891 | 100.000 | 100.000  |

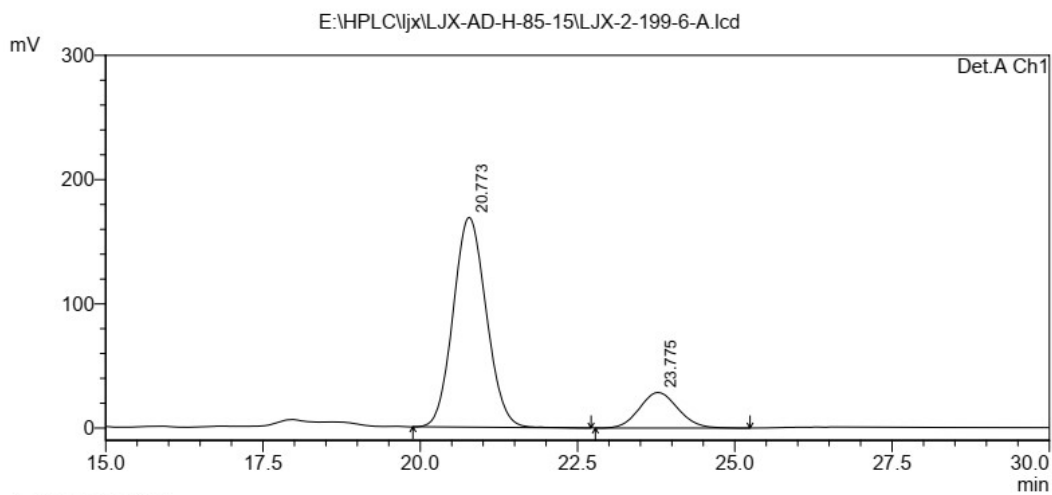

PeakTable

Detector A Ch1 254nm

| Peak# | Ret. Time | Area    | Height | Area %  | Height % |
|-------|-----------|---------|--------|---------|----------|
| 1     | 20.773    | 6176557 | 168831 | 83.496  | 85.504   |
| 2     | 23.775    | 1220905 | 28622  | 16.504  | 14.496   |
| Total |           | 7397462 | 197453 | 100.000 | 100.000  |

### Chiral product 4pa:

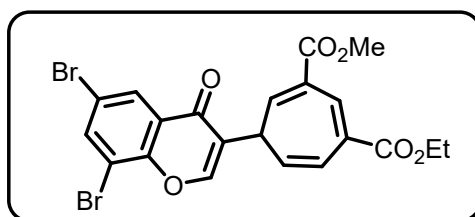

Purification by column chromatography on silica gel (petroleum ether: ethyl acetate = 5:1) afforded the compound **4pa** (37 mg, 69% yield) as a white solid.  $[\alpha]_D^{25} = +6.8$  ( $c = 1$ ,  $\text{CHCl}_3$ ). The ee value was 53%,  $t_r$  (major) = 22.431 min,  $t_r$  (minor) = 25.847 min (Chiralcel AD-H,  $\lambda = 220$  nm, hexanes : *i*PrOH = 85 : 15, flow rate = 1.0 mL/min).

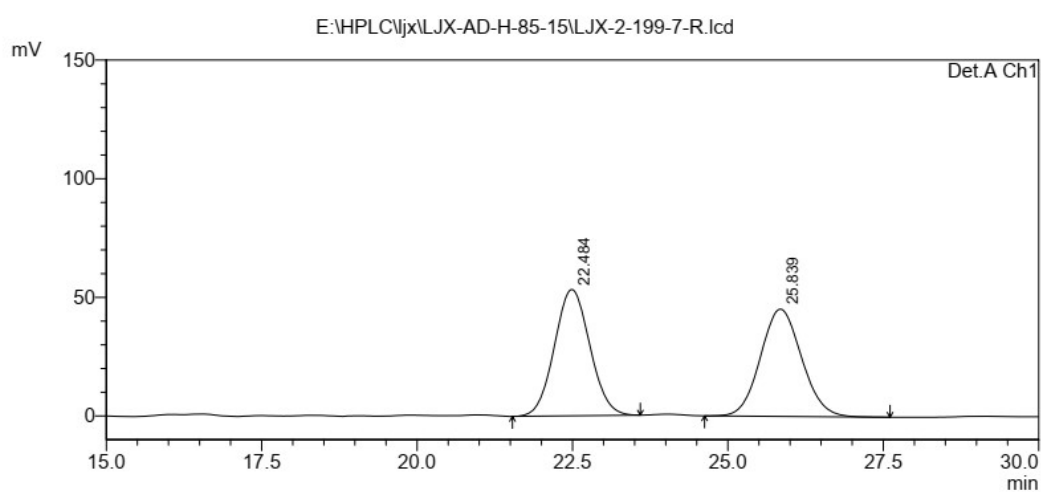

PeakTable

| Peak# | Ret. Time | Area    | Height | Area %  | Height % |
|-------|-----------|---------|--------|---------|----------|
| 1     | 22.484    | 2115355 | 53260  | 50.319  | 54.075   |
| 2     | 25.839    | 2088548 | 45232  | 49.681  | 45.925   |
| Total |           | 4203903 | 98493  | 100.000 | 100.000  |

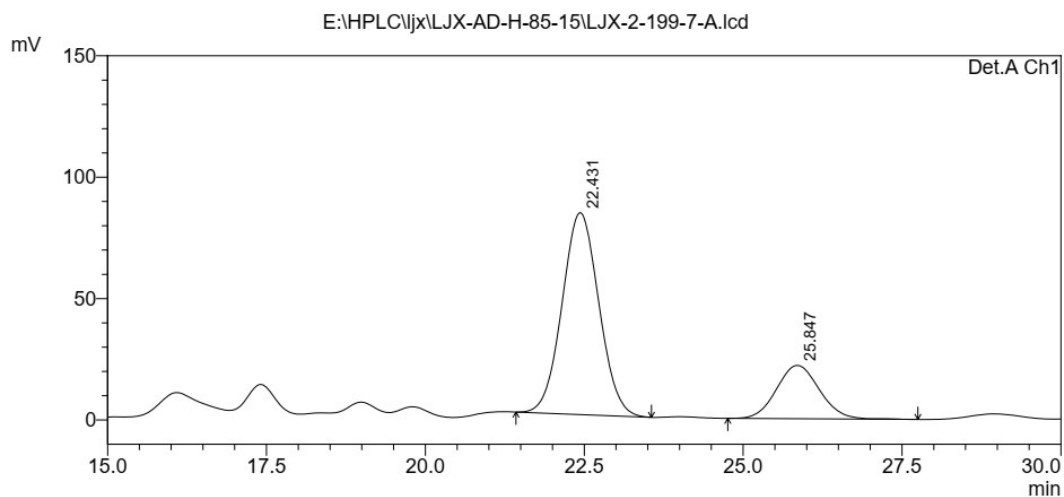

PeakTable

| Peak# | Ret. Time | Area    | Height | Area %  | Height % |
|-------|-----------|---------|--------|---------|----------|
| 1     | 22.431    | 3350918 | 83150  | 76.424  | 79.083   |
| 2     | 25.847    | 1033747 | 21993  | 23.576  | 20.917   |
| Total |           | 4384665 | 105143 | 100.000 | 100.000  |

#### Chiral product 4ua:

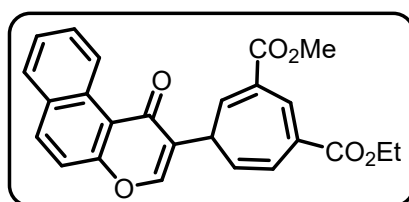

Purification by column chromatography on silica gel (petroleum ether: ethyl acetate = 5:1) afforded the compound **4pa** (30 mg, 72% yield) as a white solid.  $[\alpha]_{25}^D = +4.5$  ( $c = 0.5$ ,  $\text{CHCl}_3$ ). The ee value was 63.5%,  $t_R$  (major) = 20.443 min,  $t_R$  (minor) = 32.097 min (Chiralcel AD-H,  $\lambda = 220$  nm, hexanes : *i*PrOH = 85 : 15, flow rate = 1.0 mL/min).

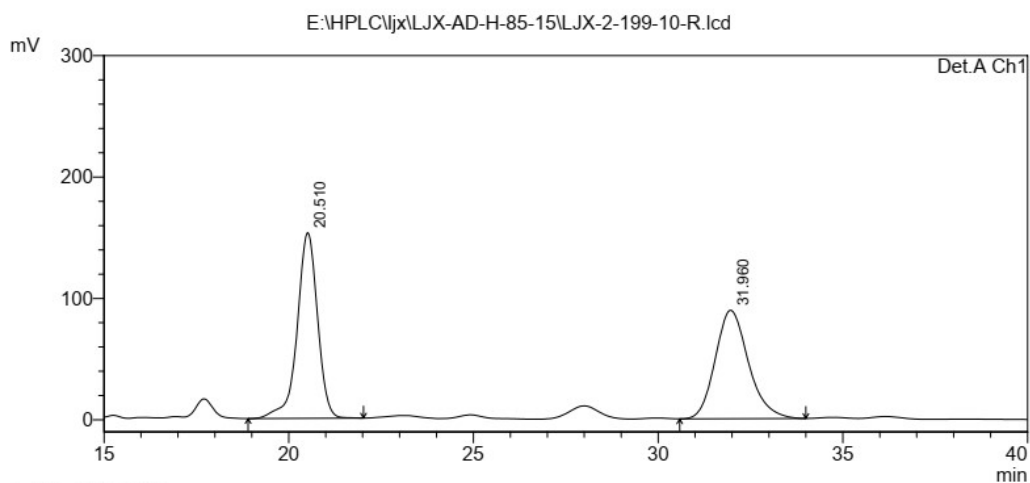

PeakTable

| Peak# | Ret. Time | Area     | Height | Area %  | Height % |
|-------|-----------|----------|--------|---------|----------|
| 1     | 20.510    | 5871664  | 152957 | 51.249  | 63.130   |
| 2     | 31.960    | 5585388  | 89331  | 48.751  | 36.870   |
| Total |           | 11457052 | 242288 | 100.000 | 100.000  |

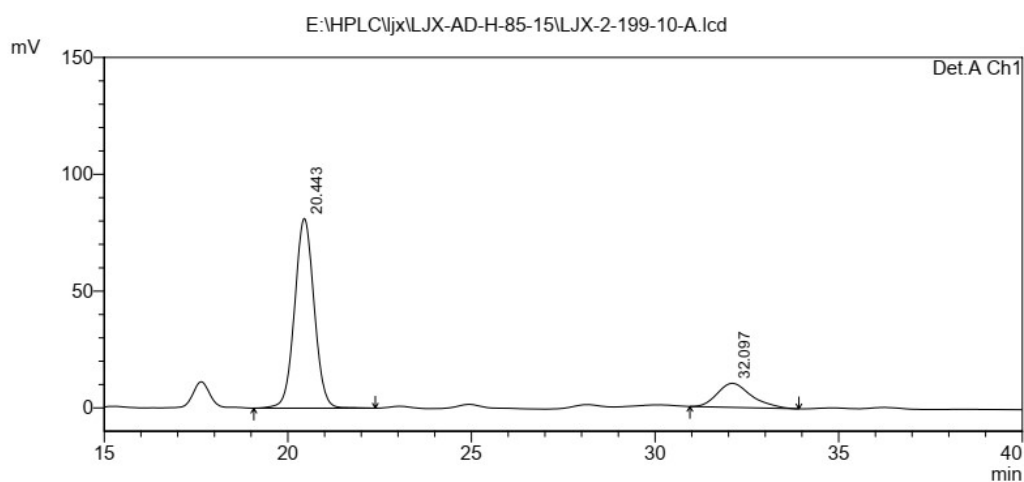

PeakTable

| Peak# | Ret. Time | Area    | Height | Area %  | Height % |
|-------|-----------|---------|--------|---------|----------|
| 1     | 20.443    | 2996794 | 81169  | 81.756  | 88.726   |
| 2     | 32.097    | 668720  | 10313  | 18.244  | 11.274   |
| Total |           | 3665514 | 91482  | 100.000 | 100.000  |

**Chiral product 4ja:**

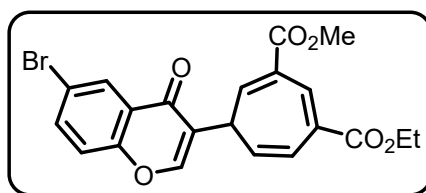

Purification by column chromatography on silica gel (petroleum ether: ethyl acetate = 5:1) afforded

the compound **4ja** (25.3 mg, 57% yield) as a white solid.  $[\alpha]_D^{25} = +15$  ( $c = 0.5$ ,  $\text{CHCl}_3$ ). The ee value was 66%,  $t_R$  (major) = 28.286 min,  $t_R$  (minor) = 32.998 min (Chiralcel AD-H,  $\lambda = 220$  nm, hexanes : *i*PrOH = 85 : 15, flow rate = 1.0 mL/min).

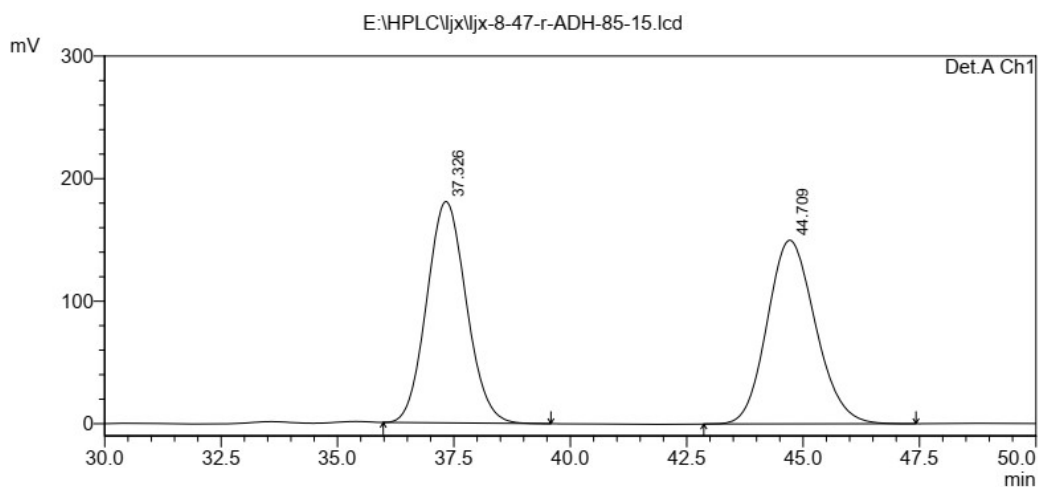

1 Det.A Ch1/254nm

PeakTable

Detector A Ch1 254nm

| Peak# | Ret. Time | Area     | Height | Area %  | Height % |
|-------|-----------|----------|--------|---------|----------|
| 1     | 37.326    | 10690611 | 180685 | 49.738  | 54.664   |
| 2     | 44.709    | 10803129 | 149853 | 50.262  | 45.336   |
| Total |           | 21493740 | 330538 | 100.000 | 100.000  |

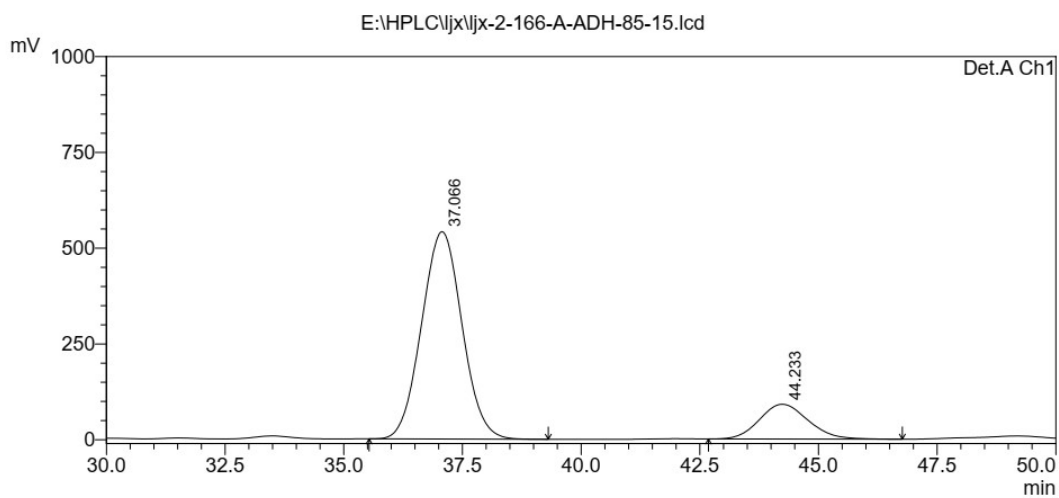

1 Det.A Ch1/254nm

PeakTable

Detector A Ch1 254nm

| Peak# | Ret. Time | Area     | Height | Area %  | Height % |
|-------|-----------|----------|--------|---------|----------|
| 1     | 37.066    | 32114531 | 541250 | 83.183  | 85.606   |
| 2     | 44.233    | 6492403  | 91005  | 16.817  | 14.394   |
| Total |           | 38606935 | 632255 | 100.000 | 100.000  |

**Chiral product 4jd:**

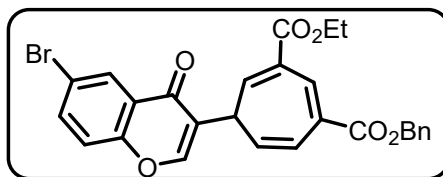

Purification by column chromatography on silica gel (petroleum ether: ethyl acetate = 5:1) afforded the compound **4jd** (30 mg, 56% yield) as a white solid (m.p. 160-162°C).  $[\alpha]_D^{25} = +6$  (c = 0.5, CHCl<sub>3</sub>). The ee value was 69.3%,  $t_R$  (major) = 37.958 min,  $t_R$  (minor) = 47.234 min (Chiralcel AD-H,  $\lambda$  = 220 nm, hexanes : *i*PrOH = 85 : 15, flow rate = 1.0 mL/min).

**<sup>1</sup>H NMR (400 MHz, CDCl<sub>3</sub>)**  $\delta$  8.36 (d,  $J$  = 2.4 Hz, 1H), 8.27 (s, 1H), 7.84 (s, 1H), 7.77 (dd,  $J$  = 8.9, 2.4 Hz, 1H), 7.40 (ddd,  $J$  = 16.3, 12.5, 4.9 Hz, 6H), 6.92 (d,  $J$  = 9.3 Hz, 1H), 6.54 (d,  $J$  = 6.4 Hz, 1H), 5.41 – 5.36 (m, 1H), 5.31 (dd,  $J$  = 24.9, 12.5 Hz, 2H), 4.25 (q,  $J$  = 7.1 Hz, 2H), 2.77 (t,  $J$  = 6.0 Hz, 1H), 1.30 (t,  $J$  = 7.1 Hz, 3H).

**<sup>13</sup>C NMR (101 MHz, CDCl<sub>3</sub>)**  $\delta$  175.68, 166.48, 165.68, 155.09, 153.35, 136.93, 135.82, 134.35, 132.99, 130.13, 128.64, 128.62, 128.50, 128.35, 128.29, 126.13, 125.35, 122.95, 120.15, 118.85, 118.07, 67.07, 61.38, 36.75, 14.28.

**HRMS (ESI):**  $m/z$  calcd for C<sub>27</sub>H<sub>22</sub>BrO<sub>6</sub> ([M+H]<sup>+</sup>): 521.0594; found: 521.0592

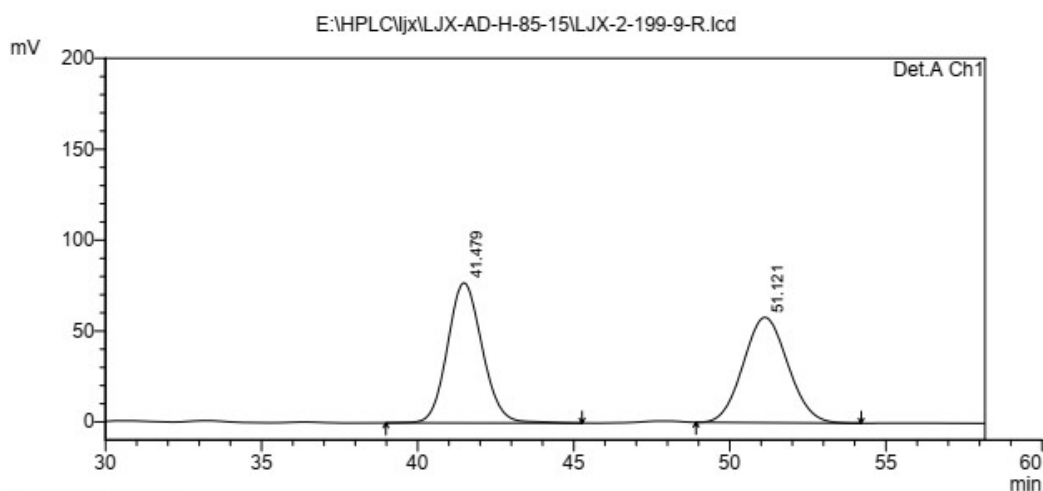

PeakTable

Detector A Ch1 254nm

| Peak# | Ret. Time | Area     | Height | Area %  | Height % |
|-------|-----------|----------|--------|---------|----------|
| 1     | 41.479    | 5966084  | 77056  | 50.837  | 57.086   |
| 2     | 51.121    | 5769676  | 57927  | 49.163  | 42.914   |
| Total |           | 11735759 | 134983 | 100.000 | 100.000  |

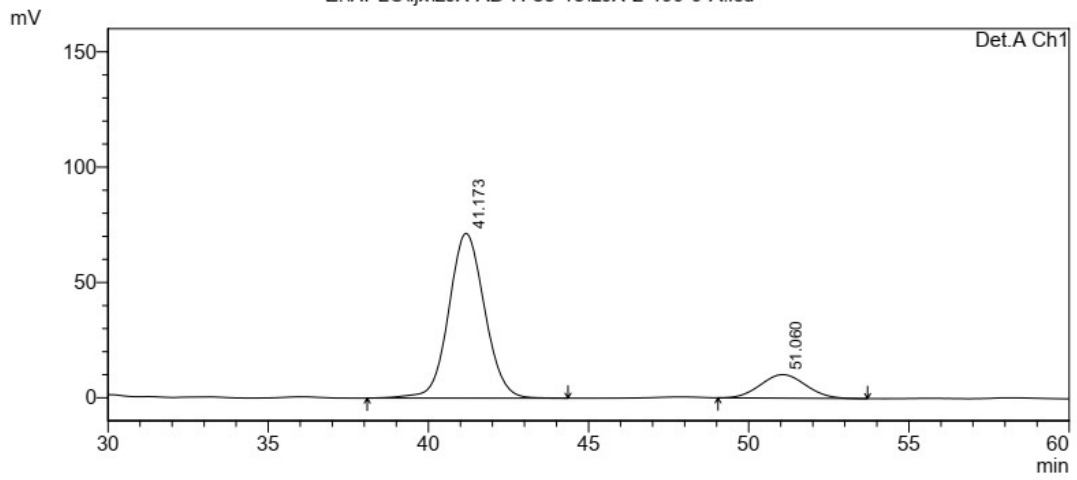

1 Det.A Ch1/254nm

PeakTable

Detector A Ch1 254nm

| Peak# | Ret. Time | Area    | Height | Area %  | Height % |
|-------|-----------|---------|--------|---------|----------|
| 1     | 41.173    | 5559976 | 71421  | 84.683  | 87.486   |
| 2     | 51.060    | 1005632 | 10216  | 15.317  | 12.514   |
| Total |           | 6565609 | 81637  | 100.000 | 100.000  |



## 6. Scale-up Experiment of the New Product 3

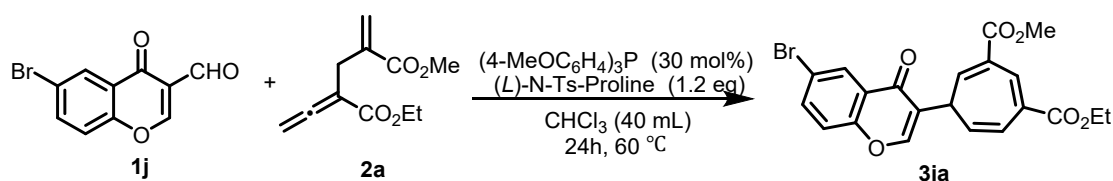

To an oven-dried 100 mL glass vial was added compound **1j** (2 mmol), allenolate **2a** (3.6 mmol),  $(L)\text{-N-Ts-Proline}$  (2.4 mmol),  $(p\text{-MeOC}_6\text{H}_4)_3\text{P}$  (0.3 eq) and 40 mL of  $\text{CHCl}_3$ . The resulting mixture was stirred at 60 °C for 24 hours until the complete consumption of the starting materials monitored by TLC. After removal of  $\text{CHCl}_3$ , the residue was subjected to a flash column chromatography (petroleum ether: ethyl acetate = 5:1) to provide **3ja** as a white solid (853 mg, 2 mmol, 96% yield)

## 7. Control and Deuterium-labeling Experiments

### 7.1. Control experiment

#### a) Cyclization of the allenolate under phosphine.

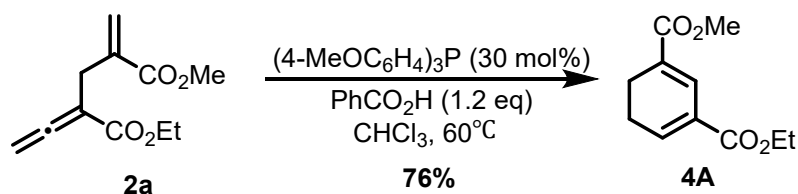

To an oven-dried 10 mL glass vial was added allenolate **2a** (0.18 mmol),  $\text{PhCO}_2\text{H}$  (0.12 mmol),  $(p\text{-MeOC}_6\text{H}_4)_3\text{P}$  (0.3 eq) and 2 mL of  $\text{CHCl}_3$ . The resulting mixture was stirred at 60 °C for 24 hours until the complete consumption of the starting materials monitored by TLC. The volatile was removed under reduced pressure and the residue was purified by preparative TLC (petroleum ether: ethyl acetate = 5:1) to afford **4A** as colorless oil (28.6 mg, 76% yield).

$^1\text{H NMR}$  (400 MHz,  $\text{CDCl}_3$ )  $\delta$  7.42 (s, 1H), 7.23 – 7.17 (m, 1H), 4.23 (q,  $J = 7.1$  Hz, 2H), 3.76 (s, 3H), 2.45 (s, 4H), 1.30 (t,  $J = 7.1$  Hz, 3H).

$^{13}\text{C NMR}$  (101 MHz,  $\text{CDCl}_3$ )  $\delta$  167.40, 164.80, 142.70, 130.52, 128.85, 128.16, 60.84, 51.78, 23.65, 20.06, 14.24.

**HRMS (ESI):**  $m/z$  calcd for  $\text{C}_{11}\text{H}_{15}\text{O}_4$  ( $[\text{M}+\text{H}]^+$ ): 211.0965; found: 211.0963.

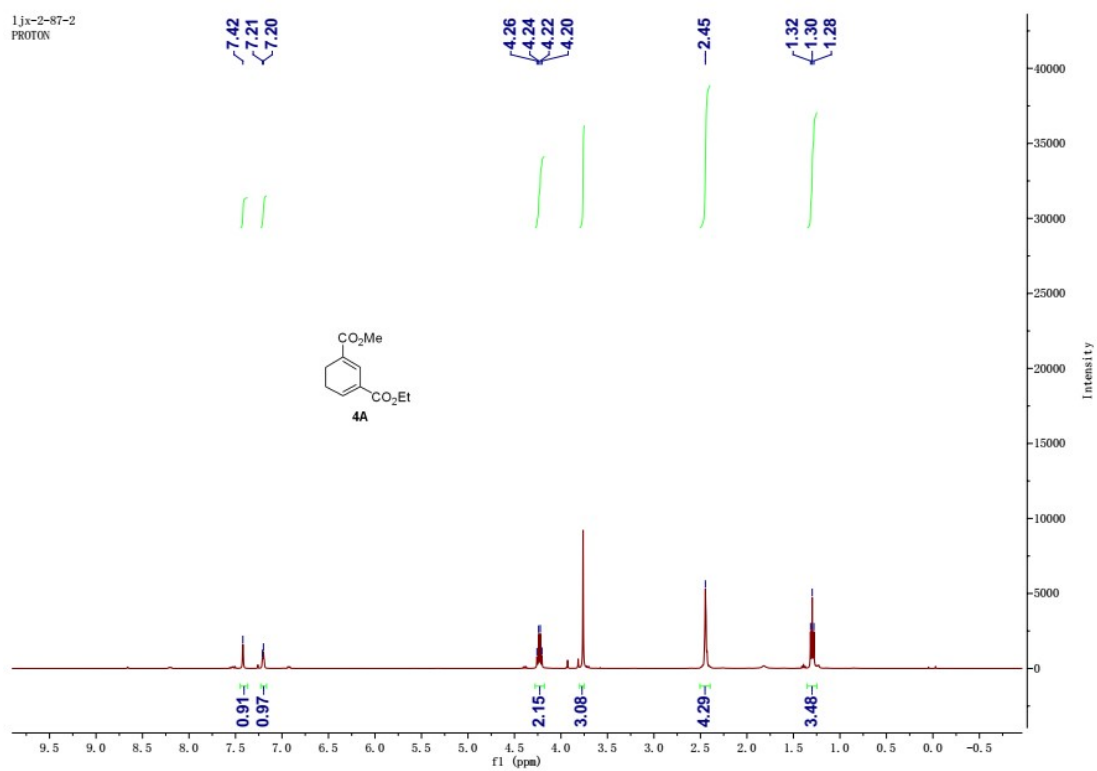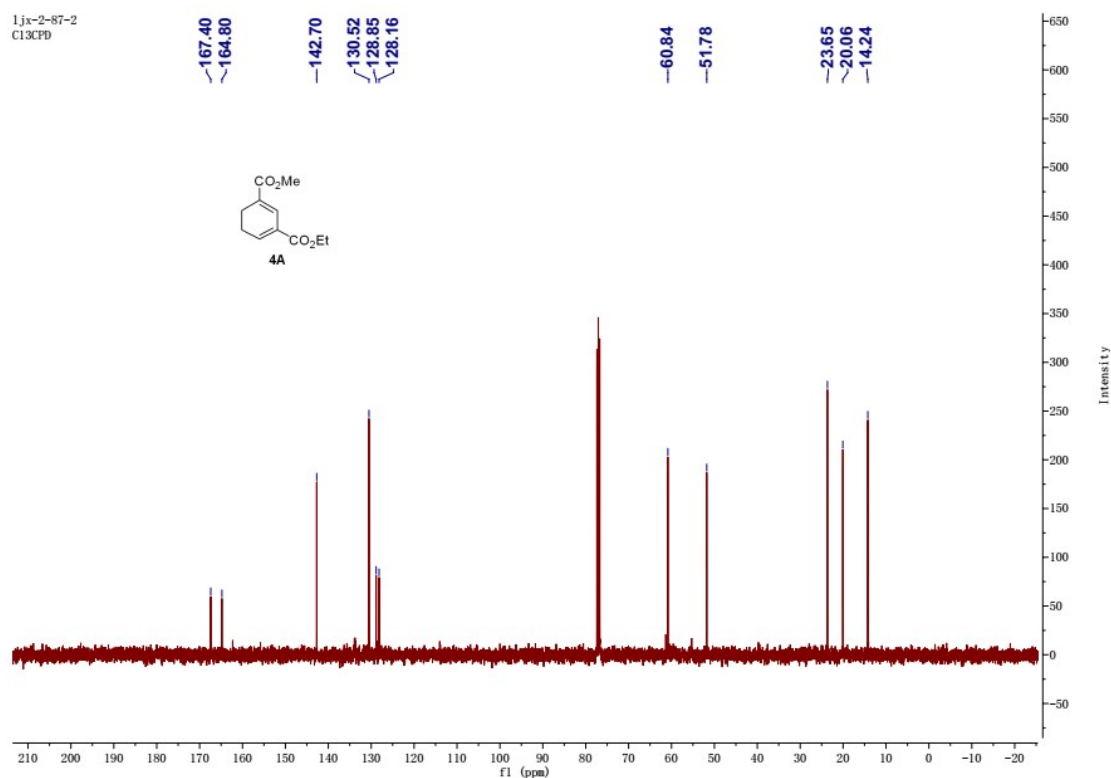

Under standard condition, cyclization product of allenoate **2a** confirmed our hypothesis that the newly-designed allenoate can work as C<sub>6</sub> synthon under proper conditions.

## b) Reaction of deuterium-labeling substrate **1a-D** under standard condition

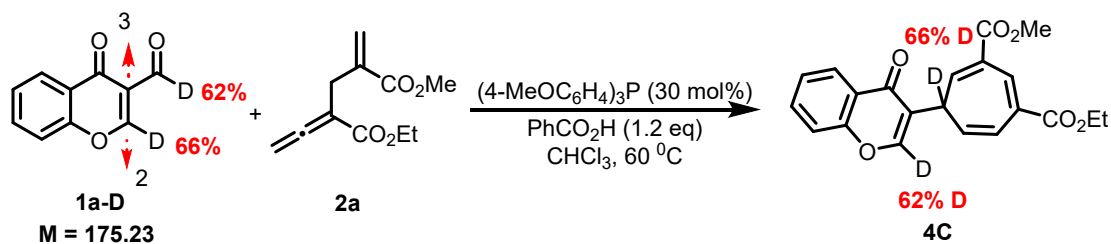

Under the standard conditions, product **4C** was obtained as colorless oil (30.8 mg, 84% yield) with exchange value of deuterium labeling, suggesting that the reaction may undergo a ring opening and ring closing process. Therefore, the electronic property of substituted 3-formylchromones affected the reaction greatly.

<sup>1</sup>H NMR (400 MHz, CDCl<sub>3</sub>) δ 8.26 (dd, *J* = 8.0, 1.3 Hz, 1H), 8.22 (s, 1H), 7.86 (d, *J* = 2.1 Hz, 1H), 7.74 – 7.68 (m, 1H), 7.48 (d, *J* = 8.4 Hz, 1H), 7.44 (t, *J* = 7.6 Hz, 1H), 6.89 (d, *J* = 9.3 Hz, 1H), 6.63 (d, *J* = 6.4 Hz, 1H), 5.44 (dd, *J* = 9.2, 5.2 Hz, 1H), 4.38 – 4.29 (m, 2H), 3.80 (s, 3H), 2.78 (t, *J* = 5.9 Hz, 1H), 1.38 (t, *J* = 7.1 Hz, 3H).

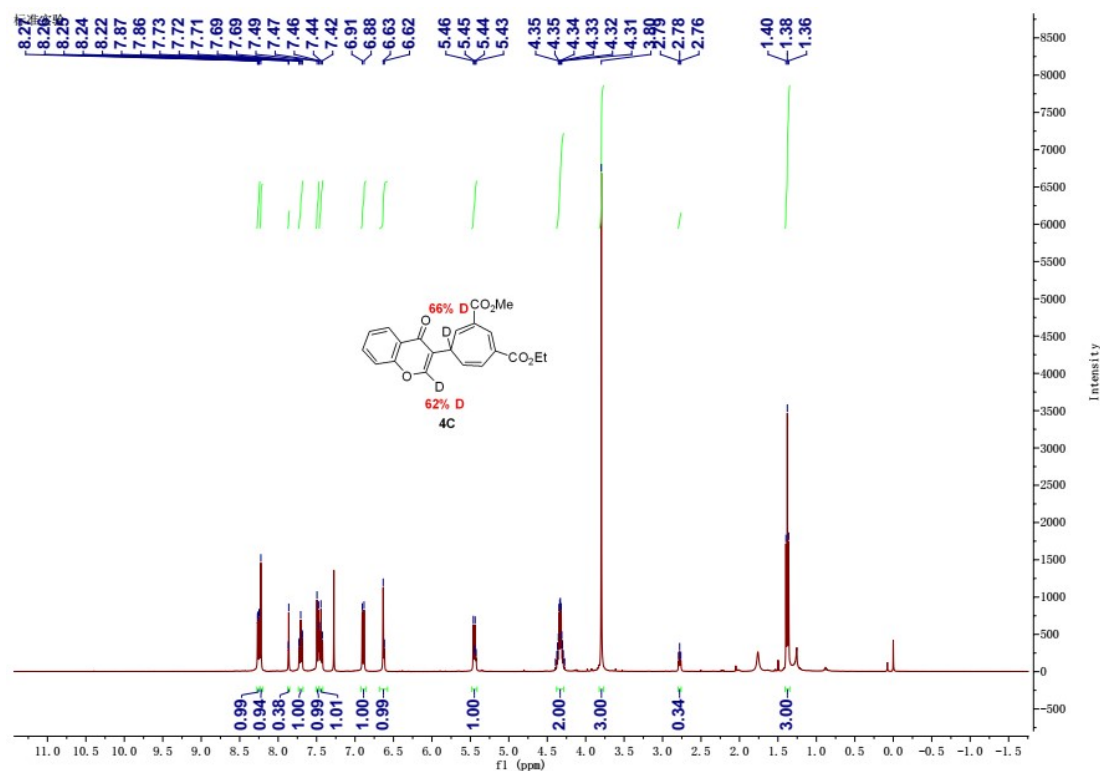

## c) Substrates control experiments

Under the standard conditions, no corresponding product was obtained when allenolate **2a** reacted with **1a-Ph**, suggesting that the steric phenyl could stop the Michael addition of zwitterion **A** to C2 of **1a-Ph**,

which thus inhibited the reaction. This experiment also confirmed the existence of ring opening and ring closing process. Alkenyl-carbaldehyde substrates **5a-5b** could not undergo the process of ring opening and ring closing, which plays important role in the reaction, failed to give the desired products.

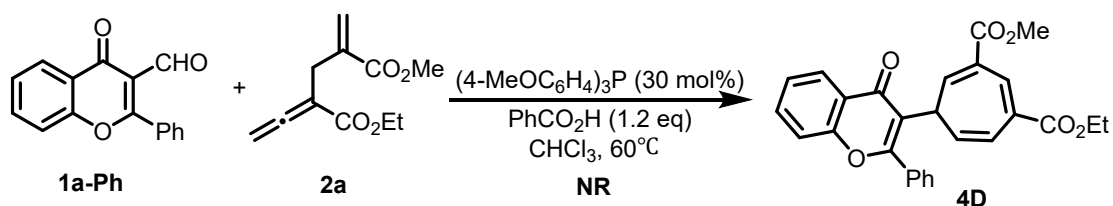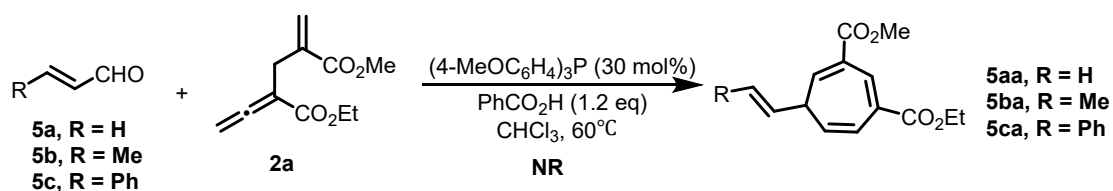

## 7.2. Deuterium-labeling reaction(d)

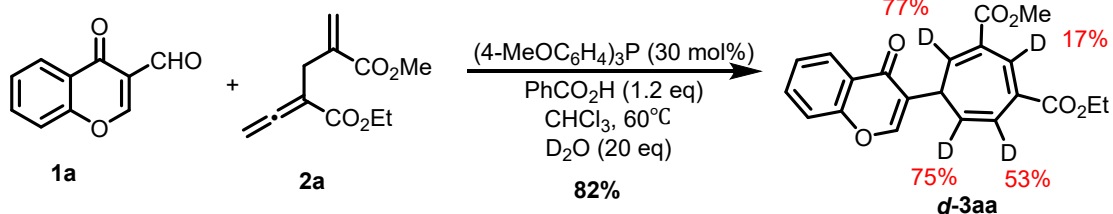

To an oven-dried 10 mL glass vial was added compound **1a** (0.1 mmol), allenolate **2** (0.18 mmol), PhCO<sub>2</sub>H (0.12 mmol), (*p*-MeOC<sub>6</sub>H<sub>4</sub>)<sub>3</sub>P (0.3 equiv) and 2.0 mL of CHCl<sub>3</sub>. Then D<sub>2</sub>O (2.0 mmol, 20.0 equiv) was added to the system. The resulting mixture was stirred at 60 °C for 24 hours until the complete consumption of the starting materials monitored by TLC. After removal of CHCl<sub>3</sub>, the residue was diluted with ethyl acetate (2.0 mL) and washed with brine. The volatile was removed under reduced pressure and the residue was purified by preparative TLC (petroleum ether: ethyl acetate = 5:1) to afford colorless oil **d-3aa** (30 mg, 82%).

<sup>1</sup>H NMR (400 MHz, CDCl<sub>3</sub>) δ 8.24 (d, *J* = 7.9 Hz, 1H), 8.20 (s, 1H), 7.85 (s, 1H), 7.69 (t, *J* = 7.7 Hz, 1H), 7.50 – 7.39 (m, 2H), 6.89 (s, 1H), 6.59 (dd, *J* = 11.3, 6.4 Hz, 1H), 5.40 (dd, *J* = 9.7, 4.9 Hz, 1H), 4.37 – 4.27 (m, 2H), 3.78 (s, 3H), 2.75 (d, *J* = 7.8 Hz, 1H), 1.36 (t, *J* = 7.1 Hz, 3H).

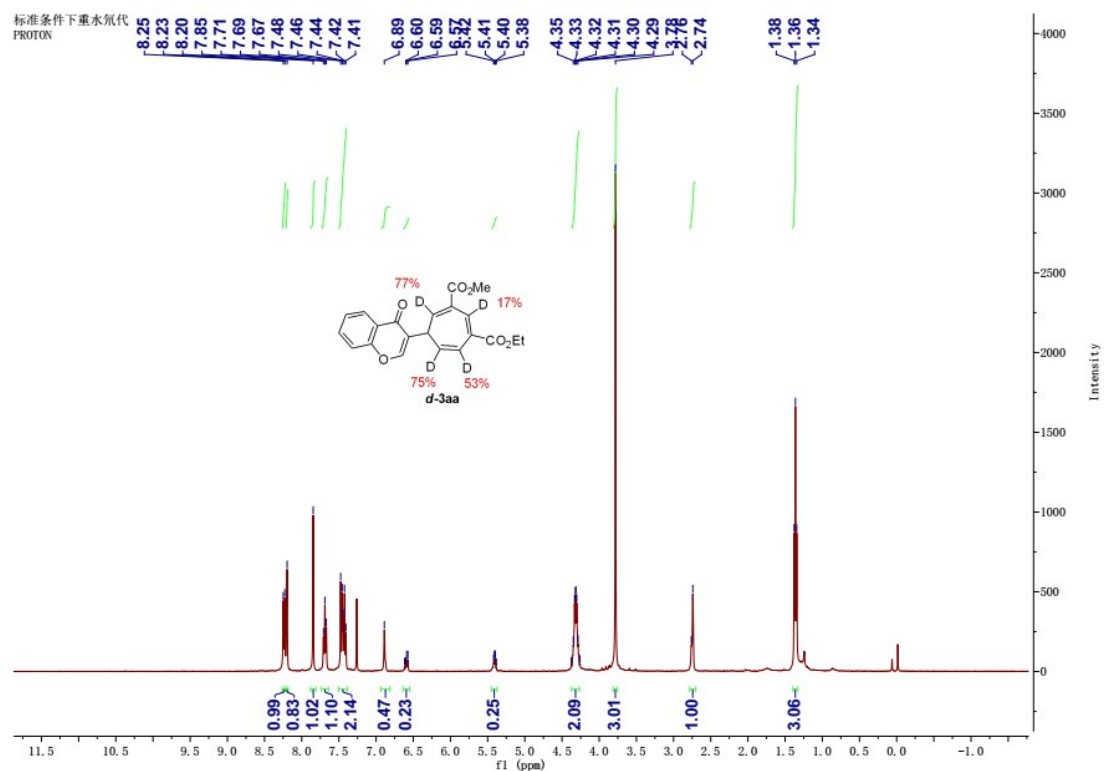

During annulation reaction catalyzed by nucleophilic phosphine, there may be four position of the allenolate involving nucleophilic site or carbanion (intermediate **A**, **E**, **G**, **H**, **I**, **J**), which would be deuterated in the present of  $D_2O$  (**Figure S1**). The nucleophilic addition of phosphine to allenolate formed zwitterion **A**, with its  $\gamma$  position 75% deuterated.

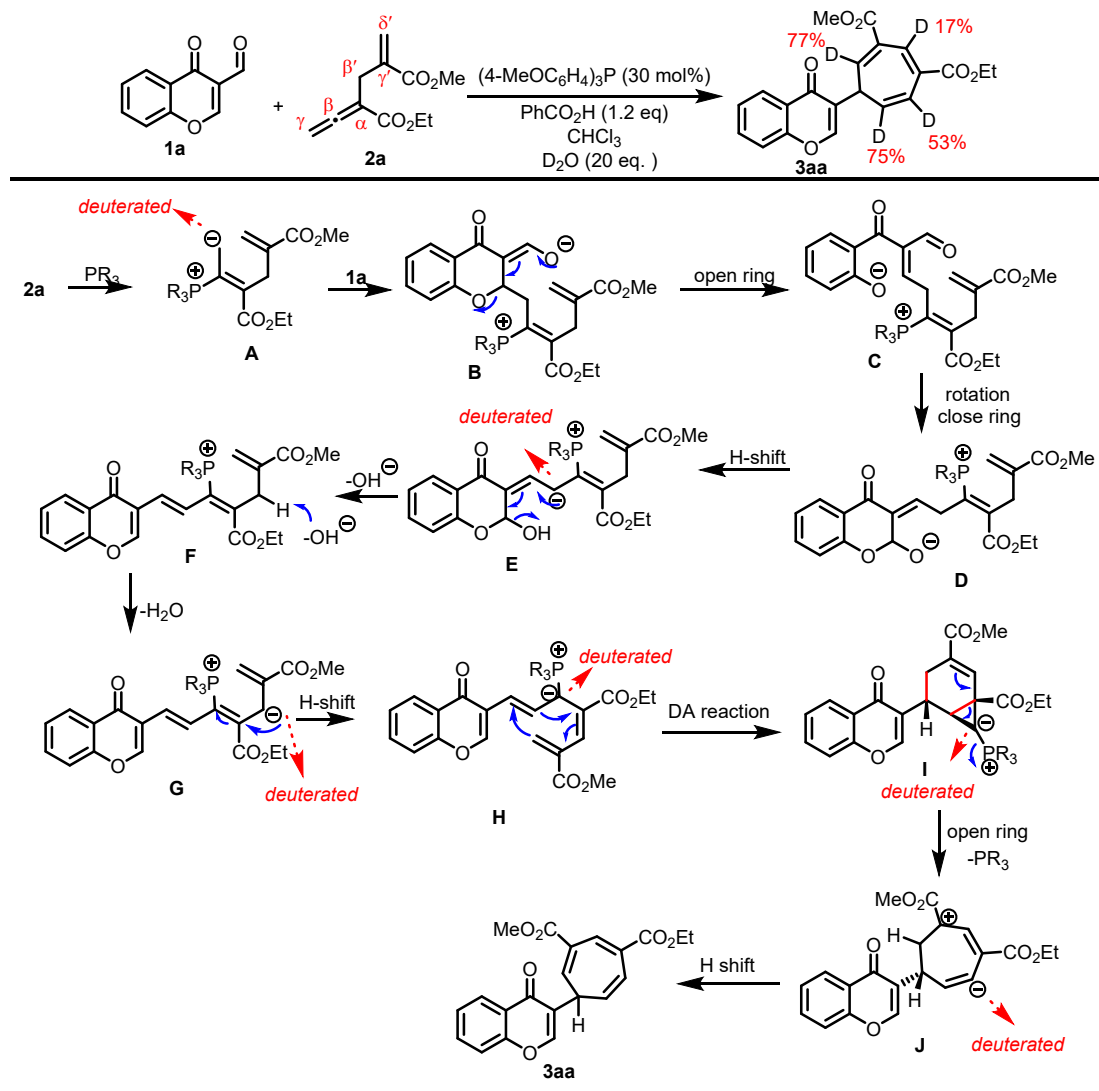

Figure S1. The exchange process of hydrogen and deuterium

## 8. Characterization Data of New Products 3

1-ethyl 3-methyl 5-(4-oxo-4H-chromen-3-yl)cyclohepta-1,3,6-triene-1,3-dicarboxylate (3aa).

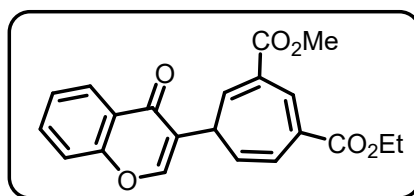

Yellow oil (34.9 mg, 95% yield) according to procedure B.

<sup>1</sup>H NMR (400 MHz, CDCl<sub>3</sub>) δ 8.18-8.21 (m, *J* = 10.5 Hz, 2H), 7.85 (s, 1H), 7.69 – 7.63 (m, 1H), 7.46 – 7.37 (m, 2H), 6.85 (d, *J* = 9.3 Hz, 1H), 6.59 (d, *J* = 6.4 Hz, 1H), 5.41 (dd, *J* = 9.1, 5.6 Hz, 1H), 4.29 (m, *J* = 7.7, 3.7 Hz, 2H), 3.75 (s, 3H), 2.73 (t, *J* = 5.9 Hz, 1H), 1.33 (t, *J* = 7.1 Hz, 3H).

<sup>13</sup>C NMR (101 MHz, CDCl<sub>3</sub>) δ 176.75, 166.46, 166.04, 156.12, 153.06, 133.74, 133.67, 133.20, 131.46, 127.78, 125.71, 125.61, 125.19, 123.86, 122.48, 119.02, 117.99, 61.17, 52.07, 36.92, 14.13.

HRMS (ESI): *m/z* calcd for C<sub>21</sub>H<sub>19</sub>NO<sub>6</sub> ([M+H]<sup>+</sup>): 367.1176; found: 367.1174

**1-ethyl 3-methyl 5-(6-methyl-4-oxo-4H-chromen-3-yl)cyclohepta-1,3,6-triene-1,3-dicarboxylate (3ba).**

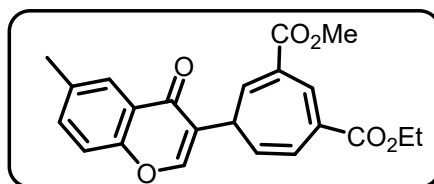

Yellow oil (28.1 mg, 74% yield) according to procedure A.

**<sup>1</sup>H NMR (400 MHz, CDCl<sub>3</sub>)** δ 8.20 (s, 1H), 8.00 (s, 1H), 7.82 (s, 1H), 7.49 (d, *J* = 8.5 Hz, 1H), 7.35 (d, *J* = 8.5 Hz, 1H), 6.86 (d, *J* = 9.2 Hz, 1H), 6.60 (d, *J* = 6.2 Hz, 1H), 5.42 (dd, *J* = 8.7, 5.8 Hz, 1H), 4.31 (dd, *J* = 6.9, 4.6 Hz, 2H), 3.77 (s, 3H), 2.74 (t, *J* = 5.6 Hz, 1H), 2.45 (s, 3H), 1.35 (t, *J* = 7.1 Hz, 3H).

**<sup>13</sup>C NMR (101 MHz, CDCl<sub>3</sub>)** δ 176.98, 166.68, 166.26, 154.60, 153.08, 135.36, 135.16, 133.84, 133.37, 131.92, 127.91, 125.73, 125.14, 123.71, 122.43, 119.42, 117.89, 61.34, 52.22, 37.13, 20.97, 14.28.

**HRMS (ESI):** *m/z* calcd for C<sub>22</sub>H<sub>21</sub>O<sub>6</sub> ([M+H]<sup>+</sup>): 381.1333; found: 381.1328

**1-ethyl 3-methyl 5-(6-ethyl-4-oxo-4H-chromen-3-yl)cyclohepta-1,3,6-triene-1,3-dicarboxylate (3ca).**

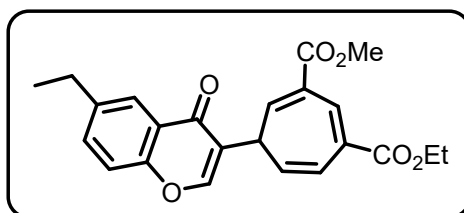

Yellow oil (29.2 mg, 74% yield) according to procedure A.

**<sup>1</sup>H NMR (400 MHz, CDCl<sub>3</sub>)** δ 8.22 (s, 1H), 8.05 (s, 1H), 7.83 (s, 1H), 7.53 (d, *J* = 7.4 Hz, 1H), 7.39 (d, *J* = 8.6 Hz, 1H), 6.87 (d, *J* = 9.2 Hz, 1H), 6.63 (d, *J* = 6.2 Hz, 1H), 5.44 (dd, *J* = 8.8, 5.7 Hz, 1H), 4.32 (dd, *J* = 6.9, 4.7 Hz, 2H), 3.78 (s, 3H), 2.74-2.79 (m, *J* = 14.8, 7.3 Hz, 3H), 1.37 (m, *J* = 7.1 Hz, 3H), 1.28 (t, *J* = 7.5 Hz, 3H).

**<sup>13</sup>C NMR (101 MHz, CDCl<sub>3</sub>)** δ 177.11, 166.71, 166.29, 154.77, 153.09, 141.72, 134.19, 133.89, 133.41, 132.06, 127.94, 125.73, 123.97, 123.85, 122.43, 119.54, 118.02, 61.36, 52.25, 37.23, 28.40, 15.53, 14.31.

**HRMS (ESI):** *m/z* calcd for C<sub>23</sub>H<sub>23</sub>O<sub>6</sub> ([M+H]<sup>+</sup>): 395.1489; found: 395.1486

**1-ethyl 3-methyl 5-(6-isopropyl-4-oxo-4H-chromen-3-yl)cyclohepta-1,3,6-triene-1,3-dicarboxylate (3da).**

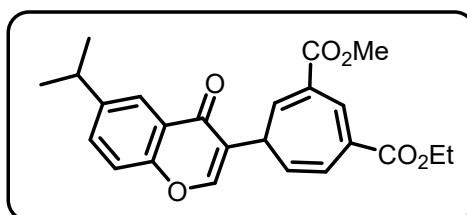

Yellow oil (25.7 mg, 63% yield) according to procedure A.

**<sup>1</sup>H NMR (400 MHz, CDCl<sub>3</sub>)** δ 8.22 (s, 1H), 8.16 (d, *J* = 8.1 Hz, 1H), 7.82 (s, 1H), 7.34 – 7.29 (m, 2H), 6.88 (d, *J* = 9.3 Hz, 1H), 6.63 (d, *J* = 6.4 Hz, 1H), 5.44 (dd, *J* = 9.3, 5.5 Hz, 1H), 4.39 – 4.28 (m, 2H), 3.79 (s, 3H), 3.05 (m, *J* = 6.9 Hz, 1H), 2.76 (t, *J* = 6.0 Hz, 1H), 1.38 (t, *J* = 7.1 Hz, 3H), 1.32 (d, *J* = 6.9 Hz, 6H).

**<sup>13</sup>C NMR (101 MHz, CDCl<sub>3</sub>)** δ 176.83, 166.69, 166.28, 156.66, 156.13, 152.95, 133.85, 133.38, 131.82, 127.95, 125.81, 125.76, 124.52, 122.52, 122.15, 119.37, 115.19, 61.34, 52.22, 50.00, 37.11, 34.38, 23.57, 14.30.

**HRMS (ESI):** *m/z* calcd for C<sub>24</sub>H<sub>25</sub>O<sub>6</sub> ([M+H]<sup>+</sup>): 409.1646; found: 409.1643

**1-ethyl 3-methyl 5-(6-(tert-butyl)-4-oxo-4H-chromen-3-yl)cyclohepta-1,3,6-triene-1,3-dicarboxylate (3ea).**

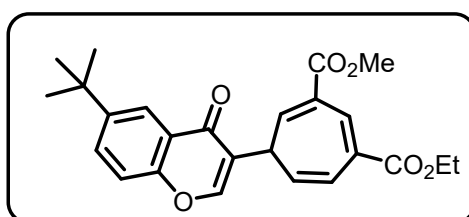

Yellow oil (27.5 mg, 65% yield) according to procedure A.

**<sup>1</sup>H NMR (400 MHz, CDCl<sub>3</sub>)** δ 8.22 (s, 2H), 7.82 (s, 1H), 7.75 (d, *J* = 7.9 Hz, 1H), 7.41 (d, *J* = 8.8 Hz, 1H), 6.87 (d, *J* = 9.3 Hz, 1H), 6.65 (d, *J* = 6.3 Hz, 1H), 5.46 (dd, *J* = 8.9, 5.7 Hz, 1H), 4.32 (dd, *J* = 6.9, 4.3 Hz, 2H), 3.78 (s, 3H), 2.75 (t, *J* = 5.7 Hz, 1H), 1.38 (s, 12H).

**<sup>13</sup>C NMR (101 MHz, CDCl<sub>3</sub>)** δ 177.46, 166.86, 166.44, 154.66, 153.22, 148.86, 134.00, 133.81, 133.49, 132.12, 132.04, 130.29, 128.58, 128.02, 125.83, 123.51, 122.48, 121.65, 119.57, 117.89, 61.49, 52.37, 37.41, 35.01, 31.40, 14.40.

**HRMS (ESI):** *m/z* calcd for C<sub>25</sub>H<sub>27</sub>O<sub>6</sub> ([M+H]<sup>+</sup>): 423.1802; found: 423.1801

**1-ethyl 3-methyl 5-(6-acetoxy-4-oxo-4H-chromen-3-yl)cyclohepta-1,3,6-triene-1,3-dicarboxylate (3fa).**

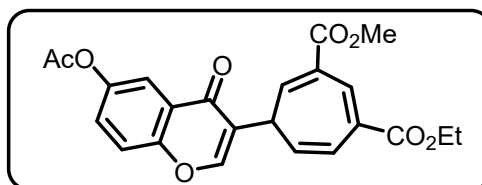

Yellow oil (27.4 mg, 65% yield) according to procedure A.

**<sup>1</sup>H NMR (400 MHz, CDCl<sub>3</sub>)** δ 8.21 (s, 1H), 7.92 (d, *J* = 2.7 Hz, 1H), 7.85 (s, 1H), 7.50 (d, *J* = 9.0 Hz, 1H), 7.43 (dd, *J* = 9.0, 2.8 Hz, 1H), 6.88 (d, *J* = 9.3 Hz, 1H), 6.59 (t, *J* = 7.9 Hz, 1H), 5.40 (dd, *J* = 9.3, 5.5 Hz, 1H), 4.41 – 4.24 (m, 2H), 3.79 (s, 3H), 2.77 (t, *J* = 6.0 Hz, 1H), 2.34 (s, 3H), 1.37 (t, *J* = 7.1 Hz, 3H).

**<sup>13</sup>C NMR (101 MHz, CDCl<sub>3</sub>)** δ 176.30, 169.29, 166.65, 166.23, 153.84, 153.29, 147.70, 133.84, 133.42, 130.88, 128.21, 128.10, 126.02, 124.77, 122.38, 119.56, 118.59, 117.93, 61.40, 52.28, 36.87, 21.02, 14.30.

**HRMS (ESI):** *m/z* calcd for C<sub>23</sub>H<sub>21</sub>O<sub>8</sub> ([M+H]<sup>+</sup>): 425.1231; found: 425.1233



**1-ethyl 3-methyl 5-(6-nitro-4-oxo-4H-chromen-3-yl)cyclohepta-1,3,6-triene-1,3-dicarboxylate (3ga).**

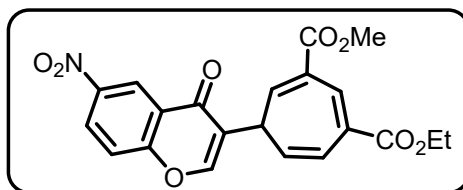

White solid (30.3 mg, 74% yield, m.p. 178-181 °C) according to procedure B.

**<sup>1</sup>H NMR (400 MHz, CDCl<sub>3</sub>)** δ 9.10 (d, *J* = 2.7 Hz, 1H), 8.52 (dd, *J* = 9.2, 2.8 Hz, 1H), 8.19 (s, 1H), 7.90 (d, *J* = 0.4 Hz, 1H), 7.64 (d, *J* = 9.2 Hz, 1H), 6.92 (d, *J* = 9.2 Hz, 1H), 6.51 (d, *J* = 6.6 Hz, 1H), 5.35 (dd, *J* = 9.3, 5.7 Hz, 1H), 4.40 – 4.22 (m, 2H), 3.80 (s, 3H), 2.84 (t, *J* = 6.1 Hz, 1H), 1.36 (t, *J* = 7.1 Hz, 3H).

**<sup>13</sup>C NMR (101 MHz, CDCl<sub>3</sub>)** δ 175.58, 166.46, 166.09, 159.05, 153.48, 144.88, 133.73, 133.35, 128.36, 128.22, 126.66, 124.01, 123.60, 122.80, 120.04, 116.42, 116.33, 61.47, 52.37, 36.17, 14.29.

**HRMS (ESI):** *m/z* calcd for C<sub>21</sub>H<sub>18</sub>NO<sub>8</sub> ([M+H]<sup>+</sup>): 412.1027; found: 412.1022.

**1-ethyl 3-methyl 5-(6-fluoro-4-oxo-4H-chromen-3-yl)cyclohepta-1,3,6-triene-1,3-dicarboxylate (3ha).**

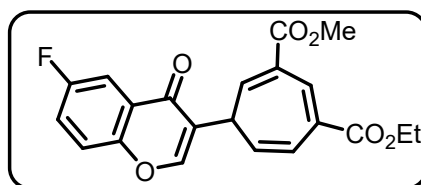

White solid (37.5 mg, 98% yield, m.p. 138-140 °C) according to procedure B.

**<sup>1</sup>H NMR (400 MHz, CDCl<sub>3</sub>)** δ 8.18 (s, 1H), 7.86 (s, 1H), 7.83 (m, *J* = 8.2, 2.6, 1.5 Hz, 1H), 7.47 (dd, *J* = 9.2, 4.2 Hz, 1H), 7.44 – 7.36 (m, 1H), 6.86 (d, *J* = 9.3 Hz, 1H), 6.55 (d, *J* = 6.4 Hz, 1H), 5.38 (dd, *J* = 9.3, 5.5 Hz, 1H), 4.36 – 4.24 (m, 2H), 3.76 (s, 3H), 2.74 (t, *J* = 5.9 Hz, 1H), 1.34 (t, *J* = 7.1 Hz, 3H).

**<sup>13</sup>C NMR (101 MHz, CDCl<sub>3</sub>)** δ 176.19, 166.57, 166.16, 159.57 (d, *J* = 247.2 Hz), 153.42, 152.54, 133.79, 133.36, 130.75, 128.05, 125.99, 125.14 (d, *J* = 7.5 Hz), 122.24 (d, *J* = 25.6 Hz), 122.08, 120.36 (d, *J* = 8.1 Hz), 118.44, 110.65 (d, *J* = 23.7 Hz), 61.37, 52.26, 36.80, 14.28.

**<sup>19</sup>F NMR (376 MHz, CDCl<sub>3</sub>)** δ -114.60.

**HRMS (ESI):** *m/z* calcd for C<sub>21</sub>H<sub>18</sub>FO<sub>6</sub> ([M+H]<sup>+</sup>): 385.1082; found: 385.1079

**1-ethyl 3-methyl 5-(6-chloro-4-oxo-4H-chromen-3-yl)cyclohepta-1,3,6-triene-1,3-dicarboxylate (3ia).**

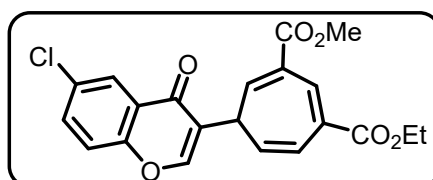

White solid (39 mg, 98% yield, m.p. 160-163 °C) according to procedure B.

**<sup>1</sup>H NMR (400 MHz, CDCl<sub>3</sub>)** δ 8.19 (s, 1H), 8.17 (d, *J* = 2.5 Hz, 1H), 7.84 (s, 1H), 7.62 (dd, *J* = 8.9, 2.6 Hz, 1H), 7.43 (d, *J* = 8.9 Hz, 1H), 6.88 (d, *J* = 9.3 Hz, 1H), 6.54 (d, *J* = 6.5 Hz, 1H), 5.37 (dd, *J* = 9.2, 5.6 Hz, 1H), 4.39 – 4.23 (m, 2H), 3.78 (s, 3H), 2.77 (t, *J* = 6.0 Hz, 1H), 1.36 (t, *J* = 7.1 Hz, 3H).

$^{13}\text{C}$  NMR (101 MHz,  $\text{CDCl}_3$ )  $\delta$  175.78, 166.56, 166.16, 154.63, 153.32, 134.15, 133.78, 133.37, 131.35, 130.28, 128.12, 126.14, 125.32, 124.94, 122.82, 119.92, 118.03, 61.38, 52.27, 36.70, 14.28.  
HRMS (ESI):  $m/z$  calcd for  $\text{C}_{21}\text{H}_{18}\text{ClO}_6$  ( $[\text{M}+\text{H}]^+$ ): 401.0786; found: 401.0784

**1-ethyl 3-methyl 5-(6-bromo-4-oxo-4H-chromen-3-yl)cyclohepta-1,3,6-triene-1,3-dicarboxylate (3ja).**

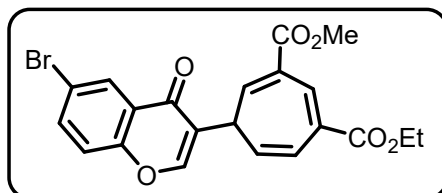

White solid (42.5 mg, 96% yield, m.p. 150-152 °C) according to procedure B.

$^1\text{H}$  NMR (400 MHz,  $\text{CDCl}_3$ )  $\delta$  8.31 (d,  $J = 2.4$  Hz, 1H), 8.18 (s, 1H), 7.84 (s, 1H), 7.74 (dd,  $J = 8.9$ , 2.5 Hz, 1H), 7.36 (d,  $J = 8.9$  Hz, 1H), 6.87 (d,  $J = 9.3$  Hz, 1H), 6.54 (d,  $J = 6.5$  Hz, 1H), 5.36 (dd,  $J = 9.3$ , 5.5 Hz, 1H), 4.38 – 4.25 (m, 2H), 3.77 (s, 3H), 2.75 (t,  $J = 6.0$  Hz, 1H), 1.35 (t,  $J = 7.1$  Hz, 3H).

$^{13}\text{C}$  NMR (101 MHz,  $\text{CDCl}_3$ )  $\delta$  175.59, 166.51, 166.11, 155.00, 153.31, 136.85, 133.75, 133.32, 130.43, 128.47, 128.04, 126.06, 125.24, 122.86, 120.12, 118.76, 118.13, 61.35, 52.25, 36.71, 14.26.

HRMS (ESI):  $m/z$  calcd for  $\text{C}_{21}\text{H}_{18}\text{BrO}_6$  ( $[\text{M}+\text{H}]^+$ ): 445.0281; found: 445.0279

**1-ethyl 3-methyl 5-(7-bromo-4-oxo-4H-chromen-3-yl)cyclohepta-1,3,6-triene-1,3-dicarboxylate (3ka).**

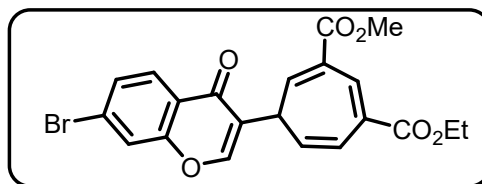

White solid (44.1 mg, 99% yield, m.p. 128-130 °C) according to procedure B.

$^1\text{H}$  NMR (400 MHz,  $\text{CDCl}_3$ )  $\delta$  8.19 (s, 1H), 8.08 (d,  $J = 8.5$  Hz, 1H), 7.81 (s, 1H), 7.65 (s, 1H), 7.53 (d,  $J = 8.5$  Hz, 1H), 6.88 (d,  $J = 9.3$  Hz, 1H), 6.55 (d,  $J = 6.4$  Hz, 1H), 5.37 (dd,  $J = 9.0$ , 5.6 Hz, 1H), 4.36 – 4.25 (m, 2H), 3.78 (s, 3H), 2.76 (t,  $J = 5.9$  Hz, 1H), 1.35 (t,  $J = 7.1$  Hz, 3H).

$^{13}\text{C}$  NMR (101 MHz,  $\text{CDCl}_3$ )  $\delta$  176.47, 166.80, 166.40, 156.55, 153.34, 134.02, 133.60, 130.57, 129.28, 128.47, 128.34, 127.61, 126.35, 123.35, 123.15, 121.48, 118.32, 61.62, 52.51, 36.97, 14.53.

HRMS (ESI):  $m/z$  calcd for  $\text{C}_{21}\text{H}_{18}\text{BrO}_6$  ( $[\text{M}+\text{H}]^+$ ): 445.0281; found: 445.0277

**1-ethyl 3-methyl 5-(7-methoxy-4-oxo-4H-chromen-3-yl)cyclohepta-1,3,6-triene-1,3-dicarboxylate (3la).**

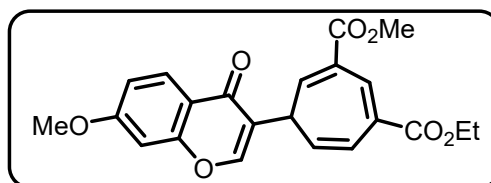

Yellow oil (29.8 mg, 75% yield) according to procedure A.

$^1\text{H}$  NMR (400 MHz,  $\text{CDCl}_3$ )  $\delta$  8.21 (s, 1H), 8.14 (d,  $J = 8.9$  Hz, 1H), 7.77 (s, 1H), 6.99 (dd,  $J = 8.9$ , 2.4 Hz, 1H), 6.87 (d,  $J = 9.3$  Hz, 1H), 6.84 (d,  $J = 2.3$  Hz, 1H), 6.62 (d,  $J = 6.4$  Hz, 1H), 5.43 (dd,  $J =$

9.3, 5.5 Hz, 1H), 4.40 – 4.23 (m, 2H), 3.91 (s, 3H), 3.78 (s, 3H), 2.74 (t,  $J = 6.0$  Hz, 1H), 1.37 (t,  $J = 7.1$  Hz, 3H).

$^{13}\text{C}$  NMR (101 MHz,  $\text{CDCl}_3$ )  $\delta$  176.53, 166.99, 166.58, 164.52, 158.41, 152.93, 134.14, 133.67, 132.21, 128.20, 127.61, 126.00, 122.80, 119.75, 118.30, 115.12, 100.43, 61.63, 56.15, 52.51, 37.37, 14.58.

HRMS (ESI):  $m/z$  calcd for  $\text{C}_{22}\text{H}_{21}\text{O}_7$  ( $[\text{M}+\text{H}]^+$ ): 397.1282; found: 397.1277

**1-ethyl 3-methyl 5-(6,7-dimethyl-4-oxo-4H-chromen-3-yl)cyclohepta-1,3,6-triene-1,3-dicarboxylate (3ma).**

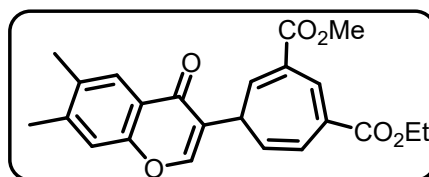

Yellow oil (25 mg, 63% yield) according to procedure A.

$^1\text{H}$  NMR (400 MHz,  $\text{CDCl}_3$ )  $\delta$  8.21 (s, 1H), 7.96 (s, 1H), 7.79 (s, 1H), 7.23 (s, 1H), 6.87 (d,  $J = 9.3$  Hz, 1H), 6.62 (d,  $J = 6.4$  Hz, 1H), 5.43 (dd,  $J = 9.3, 5.5$  Hz, 1H), 4.38 – 4.26 (m, 2H), 3.78 (s, 3H), 2.73 (t,  $J = 6.0$  Hz, 1H), 2.39 (s, 3H), 2.36 (s, 3H), 1.37 (t,  $J = 7.1$  Hz, 3H).

$^{13}\text{C}$  NMR (101 MHz,  $\text{CDCl}_3$ )  $\delta$  176.91, 166.76, 166.34, 154.94, 152.85, 144.48, 134.76, 133.88, 133.39, 132.24, 127.89, 125.69, 125.44, 122.36, 121.96, 119.69, 118.20, 61.37, 52.25, 37.22, 20.50, 19.39, 14.31.

HRMS (ESI):  $m/z$  calcd for  $\text{C}_{23}\text{H}_{23}\text{O}_6$  ( $[\text{M}+\text{H}]^+$ ): 395.1489; found: 395.1488

**1-ethyl 3-methyl 5-(6,8-dimethyl-4-oxo-4H-chromen-3-yl)cyclohepta-1,3,6-triene-1,3-dicarboxylate (3na).**

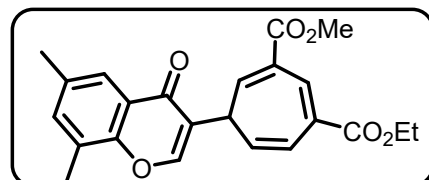

Yellow oil (33.6 mg, 85% yield) according to procedure A.

$^1\text{H}$  NMR (400 MHz,  $\text{CDCl}_3$ )  $\delta$  8.21 (s, 1H), 7.87 (s, 1H), 7.85 (d,  $J = 1.3$  Hz, 1H), 7.34 (s, 1H), 6.87 (d,  $J = 9.3$  Hz, 1H), 6.62 (d,  $J = 6.4$  Hz, 1H), 5.43 (dd,  $J = 9.3, 5.5$  Hz, 1H), 4.38 – 4.24 (m, 2H), 3.78 (s, 3H), 2.76 (t,  $J = 6.0$  Hz, 1H), 2.44 (s, 3H), 2.41 (s, 3H), 1.37 (t,  $J = 7.1$  Hz, 3H).

$^{13}\text{C}$  NMR (101 MHz,  $\text{CDCl}_3$ )  $\delta$  177.34, 166.74, 166.30, 153.21, 152.87, 136.16, 134.81, 133.89, 133.39, 132.23, 127.93, 127.28, 125.70, 123.69, 122.74, 122.20, 119.70, 61.36, 52.24, 37.17, 20.95, 15.45, 14.31.

HRMS (ESI):  $m/z$  calcd for  $\text{C}_{23}\text{H}_{23}\text{O}_6$  ( $[\text{M}+\text{H}]^+$ ): 395.1489; found: 395.1486

**1-ethyl 3-methyl 5-(6,8-dichloro-4-oxo-4H-chromen-3-yl)cyclohepta-1,3,6-triene-1,3-dicarboxylate (3oa).**

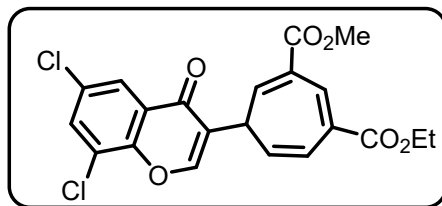

White solid (41.4 mg, 95% yield, m.p. 131-133 °C) according to procedure B.

**<sup>1</sup>H NMR (400 MHz, CDCl<sub>3</sub>)** δ 8.20 (s, 1H), 8.10 (s, 1H), 7.92 (s, 1H), 7.74 (s, 1H), 6.91 (d, *J* = 9.2 Hz, 1H), 6.53 (d, *J* = 6.1 Hz, 1H), 5.43 – 5.28 (m, 1H), 4.33 (dd, *J* = 6.3, 4.6 Hz, 2H), 3.80 (s, 3H), 2.82 (t, *J* = 5.6 Hz, 1H), 1.37 (t, *J* = 7.0 Hz, 3H).

**<sup>13</sup>C NMR (101 MHz, CDCl<sub>3</sub>)** δ 175.18, 166.48, 166.08, 153.21, 150.67, 134.04, 133.76, 133.35, 131.08, 129.21, 128.28, 126.45, 125.70, 124.42, 124.07, 123.17, 117.07, 61.44, 52.33, 36.35, 14.28.

**HRMS (ESI):** *m/z* calcd for C<sub>21</sub>H<sub>17</sub>Cl<sub>2</sub>O<sub>6</sub> ([M+H]<sup>+</sup>): 435.0397; found: 435.0393

**1-ethyl 3-methyl 5-(6,8-dibromo-4-oxo-4H-chromen-3-yl)cyclohepta-1,3,6-triene-1,3-dicarboxylate (3pa).**

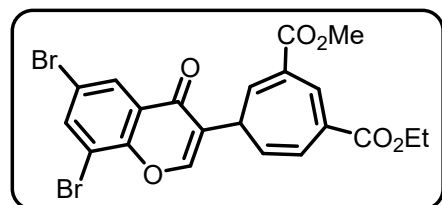

White solid (40 mg, 77% yield, m.p. 128-131 °C) according to procedure A.

**<sup>1</sup>H NMR (400 MHz, CDCl<sub>3</sub>)** δ 8.25 (t, *J* = 2.4 Hz, 1H), 8.16 (s, 1H), 7.99 (t, *J* = 2.1 Hz, 1H), 7.92 (s, 1H), 6.89 (d, *J* = 9.3 Hz, 1H), 6.48 (d, *J* = 6.1 Hz, 1H), 5.32 (dd, *J* = 9.2, 5.7 Hz, 1H), 4.36 – 4.24 (m, 2H), 3.77 (d, *J* = 1.3 Hz, 3H), 2.80 (t, *J* = 6.0 Hz, 1H), 1.35 (td, *J* = 7.1, 1.1 Hz, 3H).

**<sup>13</sup>C NMR (101 MHz, CDCl<sub>3</sub>)** δ 175.01, 166.40, 166.00, 153.30, 151.91, 139.52, 133.68, 133.26, 128.89, 128.22, 127.92, 126.43, 125.90, 123.13, 118.62, 116.80, 112.88, 76.74, 61.37, 52.27, 36.23, 14.25.

**HRMS (ESI):** *m/z* calcd for C<sub>21</sub>H<sub>17</sub>Br<sub>2</sub>O<sub>6</sub> ([M+H]<sup>+</sup>): 522.9386; found: 522.9382

**1-ethyl 3-methyl 5-(4-oxo-6-phenyl-4H-chromen-3-yl)cyclohepta-1,3,6-triene-1,3-dicarboxylate (3qa).**

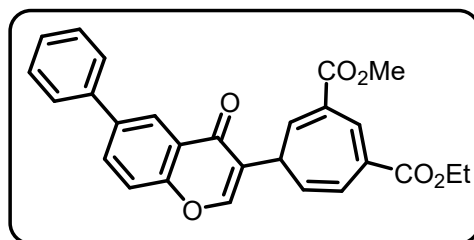

Yellow oil (41.2 mg, 93% yield) according to procedure B.

**<sup>1</sup>H NMR (400 MHz, CDCl<sub>3</sub>)** δ 8.44 (d, *J* = 2.2 Hz, 1H), 8.23 (s, 1H), 7.93 (dd, *J* = 8.7, 2.3 Hz, 1H), 7.86 (s, 1H), 7.65 (d, *J* = 7.9 Hz, 2H), 7.54 (d, *J* = 8.7 Hz, 1H), 7.47 (t, *J* = 7.6 Hz, 2H), 7.39 (t, *J* = 7.3 Hz, 1H), 6.90 (d, *J* = 9.3 Hz, 1H), 6.63 (d, *J* = 6.4 Hz, 1H), 5.44 (dd, *J* = 9.3, 5.6 Hz, 1H), 4.38 – 4.28 (m, 2H), 3.79 (s, 3H), 2.79 (t, *J* = 6.0 Hz, 1H), 1.37 (t, *J* = 7.1 Hz, 3H).

$^{13}\text{C}$  NMR (101 MHz,  $\text{CDCl}_3$ )  $\delta$  176.89, 166.60, 166.19, 155.64, 153.13, 139.14, 138.47, 133.80, 133.33, 132.74, 131.32, 128.98, 127.95, 127.89, 127.11, 125.85, 124.11, 123.61, 122.64, 118.89, 118.62, 61.32, 52.21, 36.97, 14.26.

HRMS (ESI):  $m/z$  calcd for  $\text{C}_{27}\text{H}_{23}\text{O}_6$  ( $[\text{M}+\text{H}]^+$ ): 443.1489; found: 443.1484

**1-ethyl 3-methyl 5-(6-(4-methoxyphenyl)-4-oxo-4H-chromen-3-yl)cyclohepta-1,3,6-triene-1,3-dicarboxylate (3ra).**

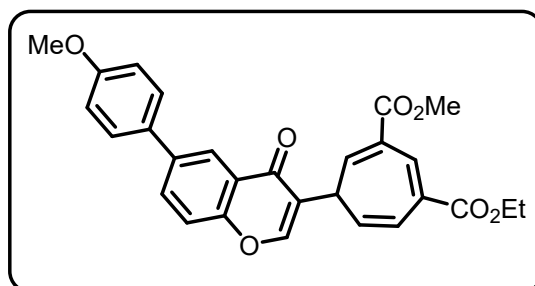

White solid (40.7 mg, 86% yield, m.p. 78-81 °C) according to procedure A.

$^1\text{H}$  NMR (400 MHz,  $\text{CDCl}_3$ )  $\delta$  8.38 (d,  $J = 2.2$  Hz, 1H), 8.22 (s, 1H), 7.85 (s, 1H), 7.57 (d,  $J = 8.6$  Hz, 2H), 7.50 (d,  $J = 8.7$  Hz, 1H), 7.45 (t,  $J = 7.6$  Hz, 1H), 6.99 (d,  $J = 8.6$  Hz, 2H), 6.89 (d,  $J = 9.3$  Hz, 1H), 6.62 (d,  $J = 6.4$  Hz, 1H), 5.43 (dd,  $J = 9.2, 5.5$  Hz, 1H), 4.32 (dt,  $J = 10.8, 7.4, 3.7$  Hz, 2H), 3.84 (s, 3H), 3.79 (s, 3H), 2.78 (t,  $J = 5.9$  Hz, 1H), 1.37 (t,  $J = 7.1$  Hz, 3H).

$^{13}\text{C}$  NMR (101 MHz,  $\text{CDCl}_3$ )  $\delta$  177.01, 166.65, 166.25, 159.62, 155.32, 153.13, 138.18, 133.82, 133.35, 132.41, 131.64, 130.12, 128.42, 128.22, 127.98, 125.90, 124.13, 122.88, 122.58, 118.55, 114.45, 61.34, 55.35, 52.23, 36.97, 14.28.

HRMS (ESI):  $m/z$  calcd for  $\text{C}_{28}\text{H}_{25}\text{O}_7$  ( $[\text{M}+\text{H}]^+$ ): 473.1595; found: 473.1593

**1-ethyl 3-methyl 5-(4-oxo-6-(4-(trifluoromethyl)phenyl)-4H-chromen-3-yl)cyclohepta-1,3,6-triene-1,3-dicarboxylate (3sa).**

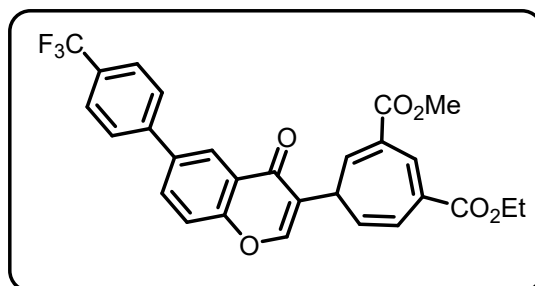

White solid (31 mg, 61% yield, m.p. 160-163 °C) according to procedure A

$^1\text{H}$  NMR (400 MHz,  $\text{CDCl}_3$ )  $\delta$  8.47 (d,  $J = 2.2$  Hz, 1H), 8.22 (s, 1H), 7.93 (dd,  $J = 8.7, 2.3$  Hz, 1H), 7.89 (d,  $J = 6.0$  Hz, 1H), 7.75 (q,  $J = 8.6$  Hz, 4H), 7.59 (d,  $J = 8.7$  Hz, 1H), 6.91 (d,  $J = 9.3$  Hz, 1H), 6.61 (d,  $J = 6.5$  Hz, 1H), 5.43 (dd,  $J = 9.2, 5.6$  Hz, 1H), 4.41 – 4.26 (m, 2H), 3.80 (s, 3H), 2.82 (t,  $J = 6.0$  Hz, 1H), 1.38 (t,  $J = 7.1$  Hz, 3H).

$^{13}\text{C}$  NMR (101 MHz,  $\text{CDCl}_3$ )  $\delta$  176.84, 166.67, 166.27, 156.17, 153.30, 142.74, 137.06, 133.87, 133.43, 132.77, 130.98,  $\delta$  130.04 (q,  $J = 32.8$  Hz), 128.11, 127.53, 126.04 (m,  $J = 6.3, 2.3$  Hz), 124.15 (d,  $J = 272.0$  Hz), 124.30, 122.93, 119.08, 118.60, 61.44, 52.34, 36.93, 14.33.

$^{19}\text{F}$  NMR (376 MHz,  $\text{CDCl}_3$ )  $\delta$  -62.49.

**HRMS (ESI):** m/z calcd for C<sub>28</sub>H<sub>22</sub>F<sub>3</sub>O<sub>6</sub> ([M+H]<sup>+</sup>): 511.1363; found: 511.1363

**1-ethyl 3-methyl 5-(6-(benzo[b]thiophen-2-yl)-4-oxo-4H-chromen-3-yl)cyclohepta-1,3,6-triene-1,3-dicarboxylate (3ta)**

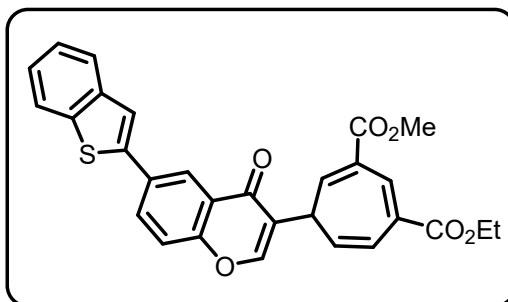

White solid (33.4 mg, 67% yield, m.p. 133-135 °C) according to procedure A.

**<sup>1</sup>H NMR (400 MHz, CDCl<sub>3</sub>)** δ 8.53 (d, *J* = 1.3 Hz, 1H), 8.23 (s, 1H), 8.02 (dd, *J* = 8.8, 1.2 Hz, 1H), 7.84 (d, *J* = 4.9 Hz, 2H), 7.80 (d, *J* = 7.5 Hz, 1H), 7.64 (s, 1H), 7.53 (d, *J* = 8.8 Hz, 1H), 7.40 – 7.31 (m, 2H), 6.91 (d, *J* = 9.3 Hz, 1H), 6.63 (d, *J* = 6.4 Hz, 1H), 5.44 (dd, *J* = 9.2, 5.6 Hz, 1H), 4.40 – 4.26 (m, 2H), 3.81 (s, 3H), 2.80 (t, *J* = 5.9 Hz, 1H), 1.38 (t, *J* = 7.1 Hz, 3H).

**<sup>13</sup>C NMR (101 MHz, CDCl<sub>3</sub>)** δ 176.64, 166.65, 166.24, 155.89, 153.15, 141.99, 140.49, 139.66, 133.83, 133.37, 131.80, 130.14, 128.45, 128.03, 126.00, 124.81, 124.75, 124.22, 123.84, 122.99, 122.77, 122.32, 120.62, 118.93, 118.47, 61.39, 52.28, 36.93, 14.30.

**HRMS (ESI):** m/z calcd for C<sub>29</sub>H<sub>23</sub>O<sub>6</sub>S<sub>8</sub> ([M+H]<sup>+</sup>): 499.1210; found: 499.1212

**1-ethyl 3-methyl 5-(1-oxo-1H-benzo[f]chromen-2-yl)cyclohepta-1,3,6-triene-1,3-dicarboxylate (3ua).**

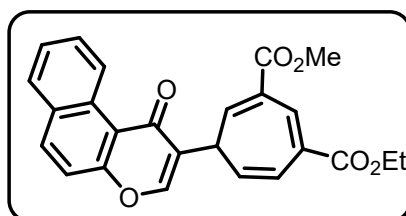

Yellow solid (31.1 mg, 75% yield) according to procedure A.

**<sup>1</sup>H NMR (400 MHz, CDCl<sub>3</sub>)** δ 10.04 (d, *J* = 8.6 Hz, 1H), 8.24 (s, 1H), 8.09 (d, *J* = 9.1 Hz, 1H), 7.91 (d, *J* = 9.9 Hz, 2H), 7.75 (m, *J* = 8.5, 7.0, 1.3 Hz, 1H), 7.66 – 7.59 (m, 1H), 7.50 (d, *J* = 9.1 Hz, 1H), 6.91 (d, *J* = 9.3 Hz, 1H), 6.70 (d, *J* = 6.4 Hz, 1H), 5.51 (dd, *J* = 9.3, 5.5 Hz, 1H), 4.38 – 4.29 (m, 2H), 3.80 (s, 3H), 2.88 (t, *J* = 5.9 Hz, 1H), 1.38 (t, *J* = 7.1 Hz, 3H).

**<sup>13</sup>C NMR (101 MHz, CDCl<sub>3</sub>)** δ 178.44, 166.65, 166.24, 157.57, 150.68, 135.72, 133.85, 133.38, 132.30, 130.56, 130.39, 129.35, 128.37, 128.25, 127.91, 127.00, 126.73, 125.69, 125.08, 119.70, 117.44, 61.30, 52.20, 37.13, 14.27.

**HRMS (ESI):** m/z calcd for C<sub>25</sub>H<sub>21</sub>O<sub>6</sub> ([M+H]<sup>+</sup>): 417.1333; found: 417.1327

**dimethyl 5-(4-oxo-4H-chromen-3-yl)cyclohepta-1,3,6-triene-1,3-dicarboxylate (3ab).**

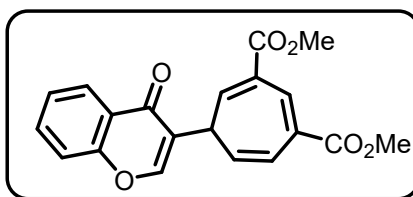

Yellow oil (33.7 mg, 96% yield) according to procedure B.

**<sup>1</sup>H NMR (400 MHz, CDCl<sub>3</sub>)** δ 8.23 (dd, *J* = 8.1, 1.1 Hz, 1H), 8.21 (s, 1H), 7.85 (s, 1H), 7.74 – 7.63 (m, 1H), 7.48 – 7.39 (m, 2H), 6.86 (d, *J* = 9.3 Hz, 1H), 6.62 (d, *J* = 6.4 Hz, 1H), 5.44 (dd, *J* = 9.2, 5.6 Hz, 1H), 3.86 (s, 3H), 3.78 (s, 3H), 2.77 (t, *J* = 5.9 Hz, 1H).

**<sup>13</sup>C NMR (101 MHz, CDCl<sub>3</sub>)** δ 176.97, 167.16, 166.22, 156.35, 153.19, 134.08, 133.94, 133.08, 131.86, 128.03, 125.97, 125.81, 125.41, 124.09, 122.65, 119.38, 118.18, 52.41, 52.29, 37.12.

**HRMS (ESI):** *m/z* calcd for C<sub>20</sub>H<sub>17</sub>O<sub>6</sub> ([M+H]<sup>+</sup>): 353.1020; found: 353.1017

**diethyl 5-(4-oxo-4H-chromen-3-yl)cyclohepta-1,3,6-triene-1,3-dicarboxylate (3ac).**

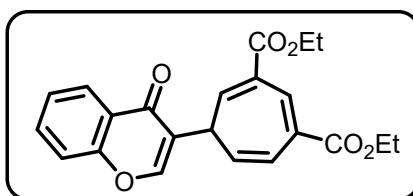

Yellow oil (36 mg, 95% yield) according to procedure B.

**<sup>1</sup>H NMR (400 MHz, CDCl<sub>3</sub>)** δ 8.24 (d, *J* = 9.1 Hz, 1H), 8.22 (s, 1H), 7.85 (s, 1H), 7.69 (t, *J* = 7.5 Hz, 1H), 7.52 – 7.37 (m, 2H), 6.88 (d, *J* = 9.3 Hz, 1H), 6.58 (d, *J* = 6.3 Hz, 1H), 5.43 (dd, *J* = 9.0, 5.6 Hz, 1H), 4.37 – 4.20 (m, 4H), 2.76 (t, *J* = 5.8 Hz, 1H), 1.36 (t, *J* = 7.1 Hz, 3H), 1.30 (t, *J* = 7.1 Hz, 3H).

**<sup>13</sup>C NMR (101 MHz, CDCl<sub>3</sub>)** δ 176.92, 166.69, 165.78, 156.31, 153.18, 133.95, 133.88, 133.30, 131.19, 128.34, 125.93, 125.80, 125.35, 124.05, 122.75, 119.06, 118.14, 61.31, 61.25, 37.02, 14.27.

**HRMS (ESI):** *m/z* calcd for C<sub>22</sub>H<sub>21</sub>O<sub>6</sub> ([M+H]<sup>+</sup>): 381.1333; found: 381.1330

**1-benzyl 3-ethyl 5-(4-oxo-4H-chromen-3-yl)cyclohepta-1,3,6-triene-1,3-dicarboxylate (3ad).**

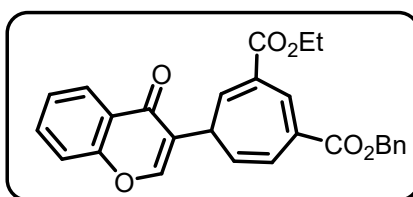

Yellow oil (42.3 mg, 96% yield) according to procedure B.

**<sup>1</sup>H NMR (400 MHz, CDCl<sub>3</sub>)** δ 8.28 (s, 1H), 8.24 (d, *J* = 7.9 Hz, 1H), 7.84 (s, 1H), 7.69 (t, *J* = 7.7 Hz, 1H), 7.51 – 7.30 (m, 7H), 6.91 (d, *J* = 9.3 Hz, 1H), 6.59 (d, *J* = 6.4 Hz, 1H), 5.43 (dd, *J* = 9.1, 5.6 Hz, 1H), 5.31 (q, *J* = 12.4 Hz, 2H), 4.24 (q, *J* = 7.1 Hz, 2H), 2.76 (t, *J* = 5.9 Hz, 1H), 1.30 (t, *J* = 7.1 Hz, 3H).

**<sup>13</sup>C NMR (101 MHz, CDCl<sub>3</sub>)** δ 176.91, 166.51, 165.70, 156.31, 153.19, 135.84, 134.35, 133.88, 132.96, 131.15, 128.59, 128.34, 128.28, 128.23, 125.93, 125.80, 125.36, 124.05, 122.68, 118.95, 118.14, 66.98, 61.27, 37.01, 14.25.

**HRMS (ESI):** *m/z* calcd for C<sub>27</sub>H<sub>23</sub>O<sub>6</sub> ([M+H]<sup>+</sup>): 443.1489; found: 443.1489

**3-butyl 1-ethyl 5-(4-oxo-4H-chromen-3-yl)cyclohepta-1,3,6-triene-1,3-dicarboxylate (3ae).**

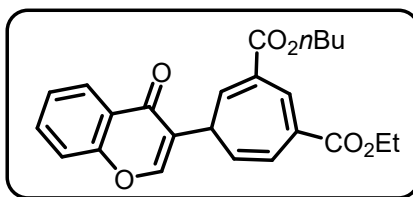

Yellow oil (35.3 mg, 87% yield) according to procedure B.

**<sup>1</sup>H NMR (400 MHz, CDCl<sub>3</sub>)** δ 8.24 (d, *J* = 8.3 Hz, 1H), 8.22 (s, 1H), 7.85 (s, 1H), 7.68 (t, *J* = 7.2 Hz, 1H), 7.51 – 7.37 (m, 2H), 6.88 (d, *J* = 9.3 Hz, 1H), 6.56 (d, *J* = 6.4 Hz, 1H), 5.42 (dd, *J* = 9.0, 5.6 Hz, 1H), 4.31 (q, *J* = 6.9 Hz, 2H), 4.19 (t, *J* = 6.7 Hz, 2H), 2.78 (t, *J* = 5.9 Hz, 1H), 1.72 – 1.59 (m, 2H), 1.38 (dt, *J* = 21.5, 7.3 Hz, 5H), 0.92 (t, *J* = 7.4 Hz, 3H).

**<sup>13</sup>C NMR (101 MHz, CDCl<sub>3</sub>)** δ 176.90, 166.69, 165.86, 156.32, 153.16, 133.95, 133.87, 133.25, 130.77, 128.41, 125.96, 125.91, 125.35, 124.08, 122.77, 118.74, 118.15, 65.16, 61.31, 36.90, 30.66, 19.17, 14.27, 13.74.

**HRMS (ESI):** *m/z* calcd for C<sub>24</sub>H<sub>25</sub>O<sub>6</sub> ([M+H]<sup>+</sup>): 409.1646; found: 409.1647

**3-(tert-butyl) 1-methyl 5-(4-oxo-4H-chromen-3-yl)cyclohepta-1,3,6-triene-1,3-dicarboxylate (3af).**

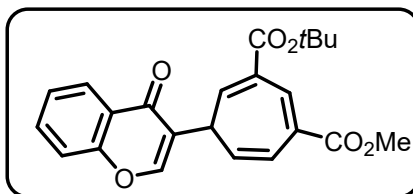

White solid (37.1 mg, 94% yield, m.p. 131-133 °C) according to procedure B.

**<sup>1</sup>H NMR (400 MHz, CDCl<sub>3</sub>)** δ 8.24 (d, *J* = 7.8 Hz, 1H), 8.20 (s, 1H), 7.84 (s, 1H), 7.68 (t, *J* = 7.6 Hz, 1H), 7.54 – 7.36 (m, 2H), 6.85 (d, *J* = 9.2 Hz, 1H), 6.49 (d, *J* = 6.2 Hz, 1H), 5.44 (dd, *J* = 8.8, 5.7 Hz, 1H), 3.84 (s, 3H), 2.75 (t, *J* = 5.7 Hz, 1H), 1.49 (s, 9H).

**<sup>13</sup>C NMR (101 MHz, CDCl<sub>3</sub>)** δ 176.88, 167.26, 164.89, 156.31, 153.16, 134.43, 133.85, 132.69, 130.98, 129.74, 125.97, 125.59, 125.32, 124.08, 122.88, 119.57, 118.14, 81.64, 52.31, 36.93, 28.10.

**HRMS (ESI):** *m/z* calcd for C<sub>23</sub>H<sub>23</sub>O<sub>6</sub> ([M+H]<sup>+</sup>): 395.1489; found: 395.1486

**1-benzhydryl 3-ethyl 5-(4-oxo-4H-chromen-3-yl)cyclohepta-1,3,6-triene-1,3-dicarboxylate (3ag).**

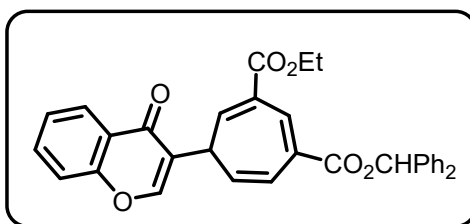

Yellow oil (50.5 mg, 97% yield) according to procedure B.

**<sup>1</sup>H NMR (400 MHz, CDCl<sub>3</sub>)** δ 8.38 (s, 1H), 8.26 (dd, *J* = 8.0, 1.5 Hz, 1H), 7.85 (s, 1H), 7.69 (ddd, *J* = 8.6, 7.2, 1.6 Hz, 1H), 7.47 (d, *J* = 8.5 Hz, 1H), 7.43 (t, *J* = 7.1 Hz, 5H), 7.39 – 7.33 (m, 4H), 7.30 (dd, *J* = 8.2, 6.1 Hz, 2H), 7.07 (s, 1H), 6.98 (d, *J* = 9.3 Hz, 1H), 6.61 (d, *J* = 6.4 Hz, 1H), 5.46 (dd, *J* = 9.2, 5.6 Hz, 1H), 4.26 (q, *J* = 7.1 Hz, 2H), 2.77 (t, *J* = 6.0 Hz, 1H), 1.32 (t, *J* = 7.1 Hz, 3H).

**<sup>13</sup>C NMR (101 MHz, CDCl<sub>3</sub>)** δ 176.92, 165.67, 165.64, 156.29, 153.25, 140.12, 140.10, 134.51, 133.89, 132.94, 131.09, 128.57, 128.30, 128.01, 127.96, 127.17, 127.04, 125.91, 125.80, 125.37, 124.04, 122.62, 118.74, 118.14, 77.75, 61.27, 36.98, 14.24.

**HRMS (ESI):** *m/z* calcd for C<sub>33</sub>H<sub>26</sub>O<sub>6</sub>Na ([M+Na]<sup>+</sup>): 541.1622; found: 541.1620.



**methyl 3-acetyl-5-(4-oxo-4H-chromen-3-yl)cyclohepta-1,3,6-triene-1-carboxylate (3ah).**

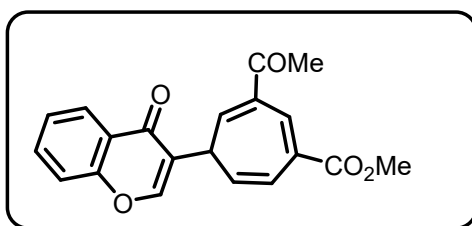

Yellow oil (33 mg, 99% yield) according to procedure A.

**<sup>1</sup>H NMR (400 MHz, CDCl<sub>3</sub>)** δ 8.24 (d, *J* = 7.9 Hz, 1H), 8.17 (s, 1H), 7.84 (s, 1H), 7.70 (t, *J* = 7.6 Hz, 1H), 7.51 – 7.42 (m, 2H), 6.97 (d, *J* = 8.8 Hz, 1H), 6.14 (d, *J* = 5.9 Hz, 1H), 5.20 – 5.12 (m, 1H), 3.84 (s, 3H), 2.55 (t, *J* = 5.7 Hz, 1H), 2.41 (s, 3H).

**<sup>13</sup>C NMR (101 MHz, CDCl<sub>3</sub>)** δ 197.31, 177.18, 166.97, 156.32, 153.37, 136.03, 133.99, 133.00, 132.02, 130.11, 128.43, 128.02, 125.85, 125.45, 124.00, 122.34, 118.20, 52.36, 35.61, 26.44.

**HRMS (ESI):** *m/z* calcd for C<sub>20</sub>H<sub>17</sub>O<sub>5</sub>Na ([M+H]<sup>+</sup>): 337.1071; found: 337.1074.

## 9. Spectra

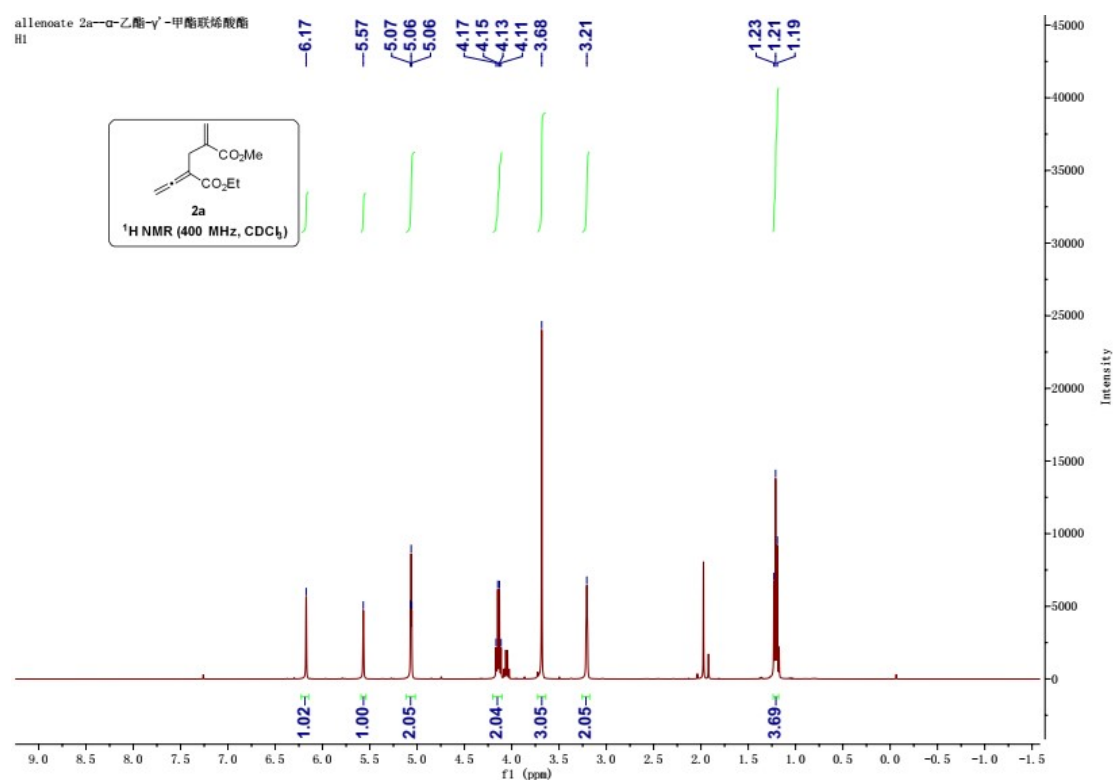

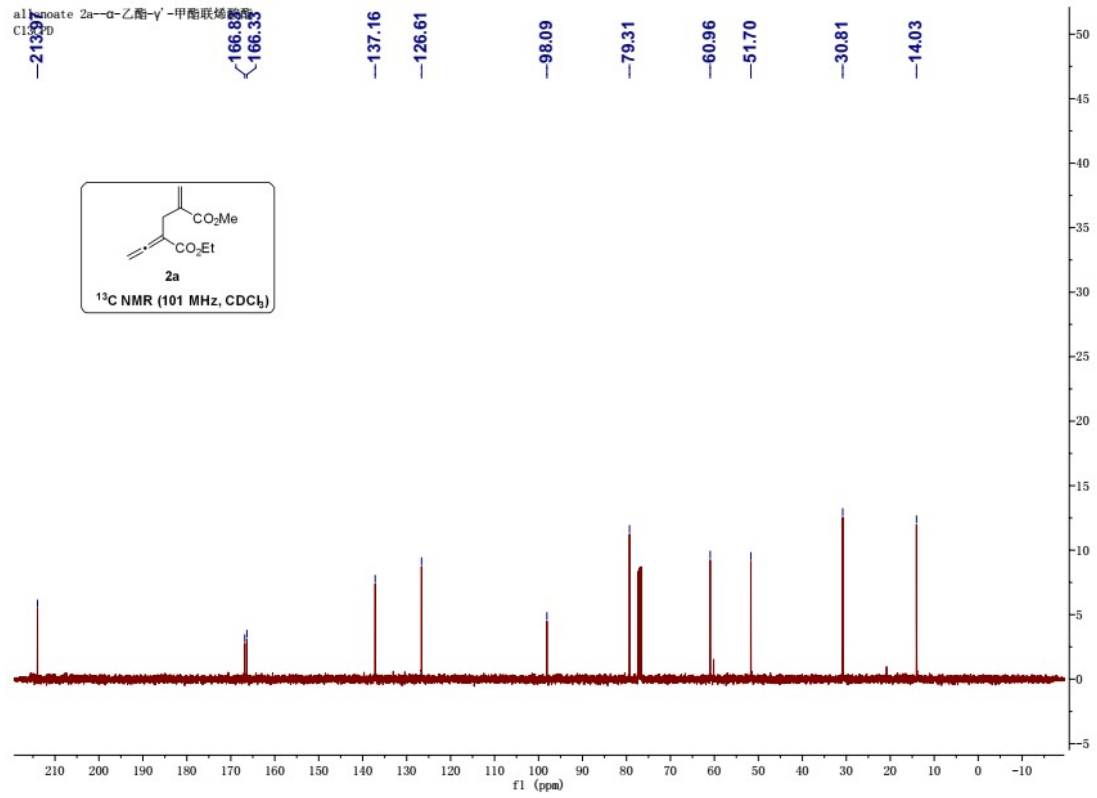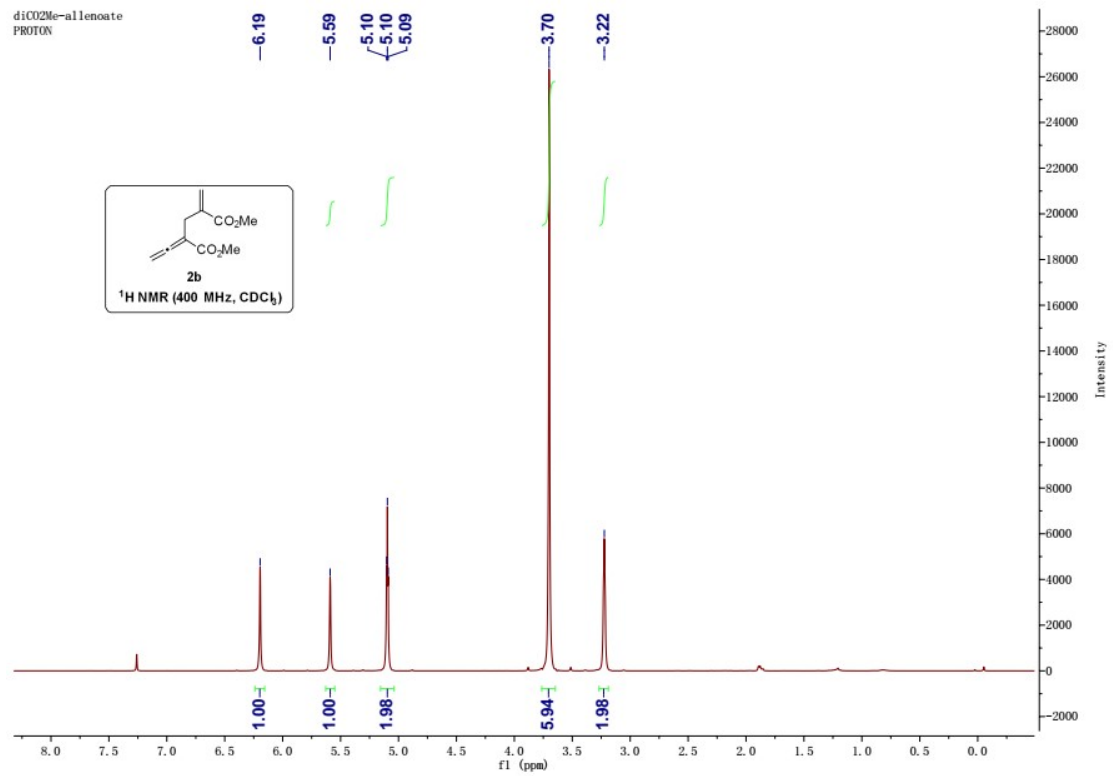

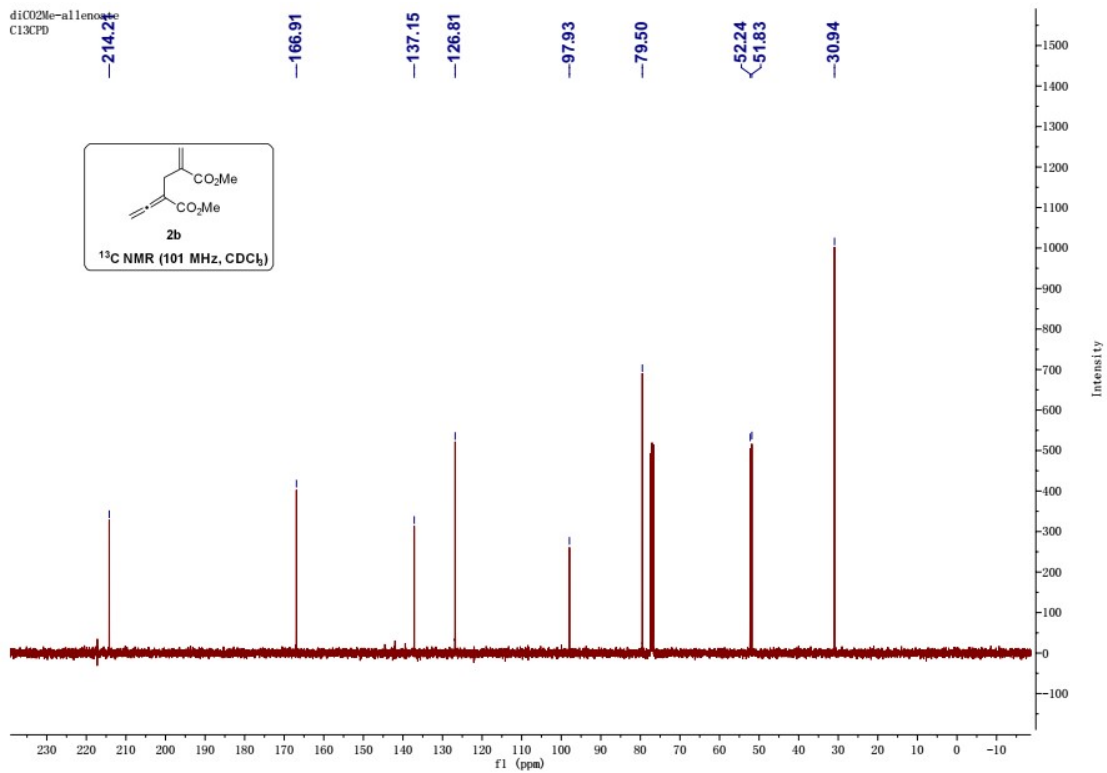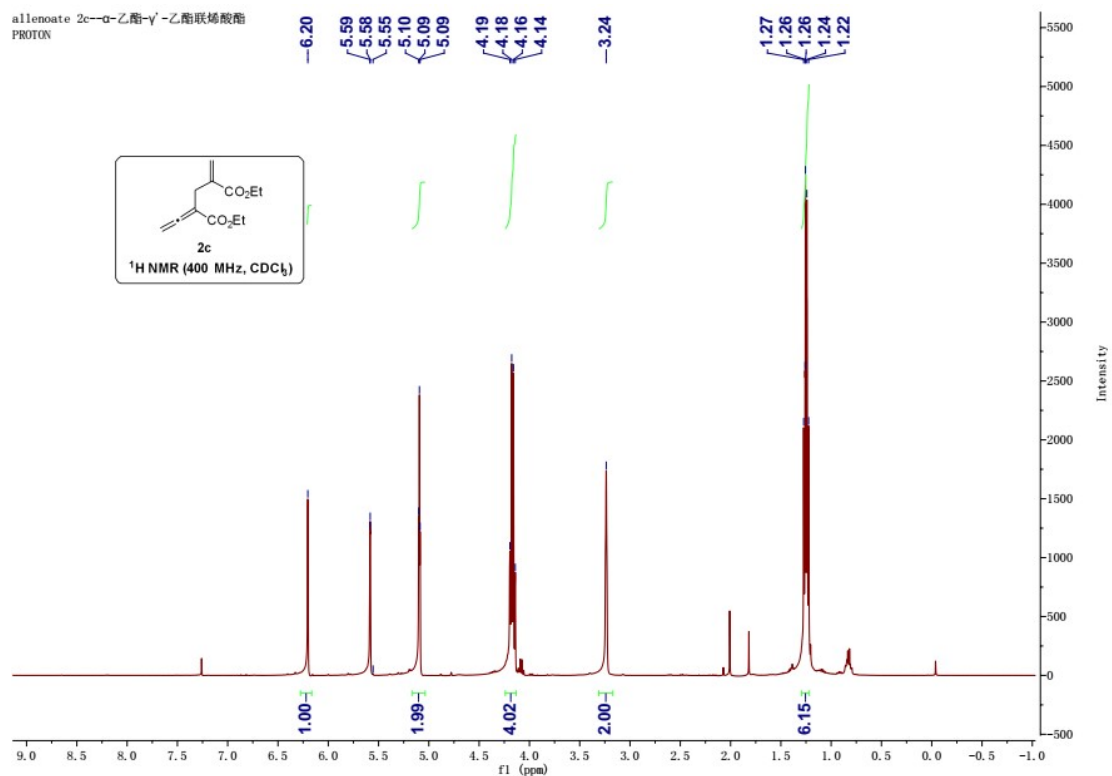

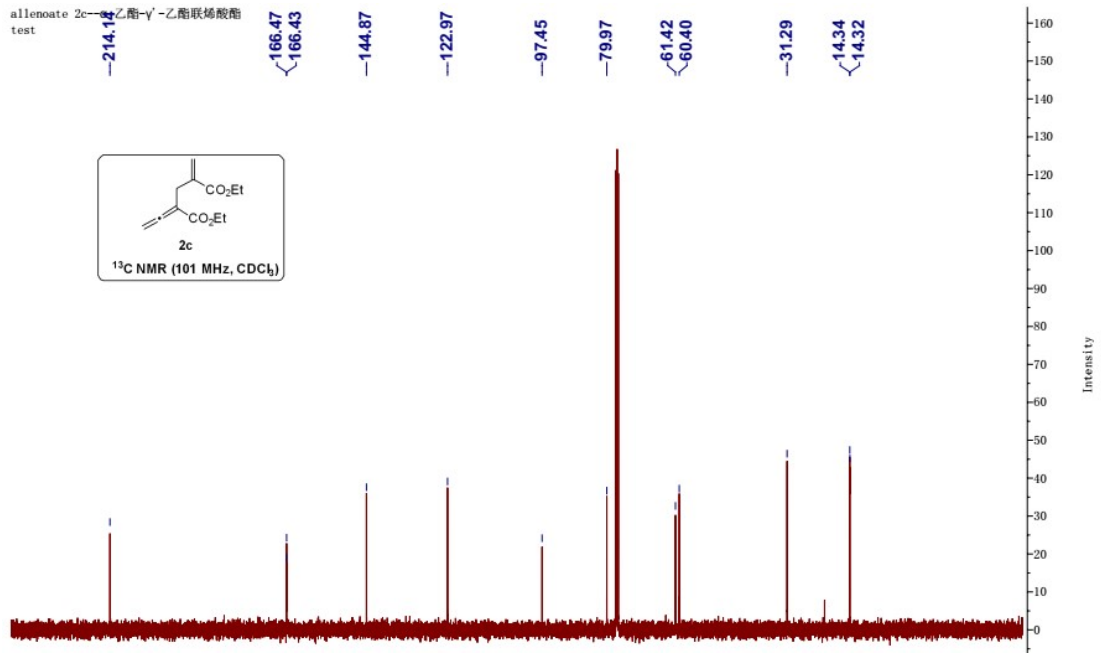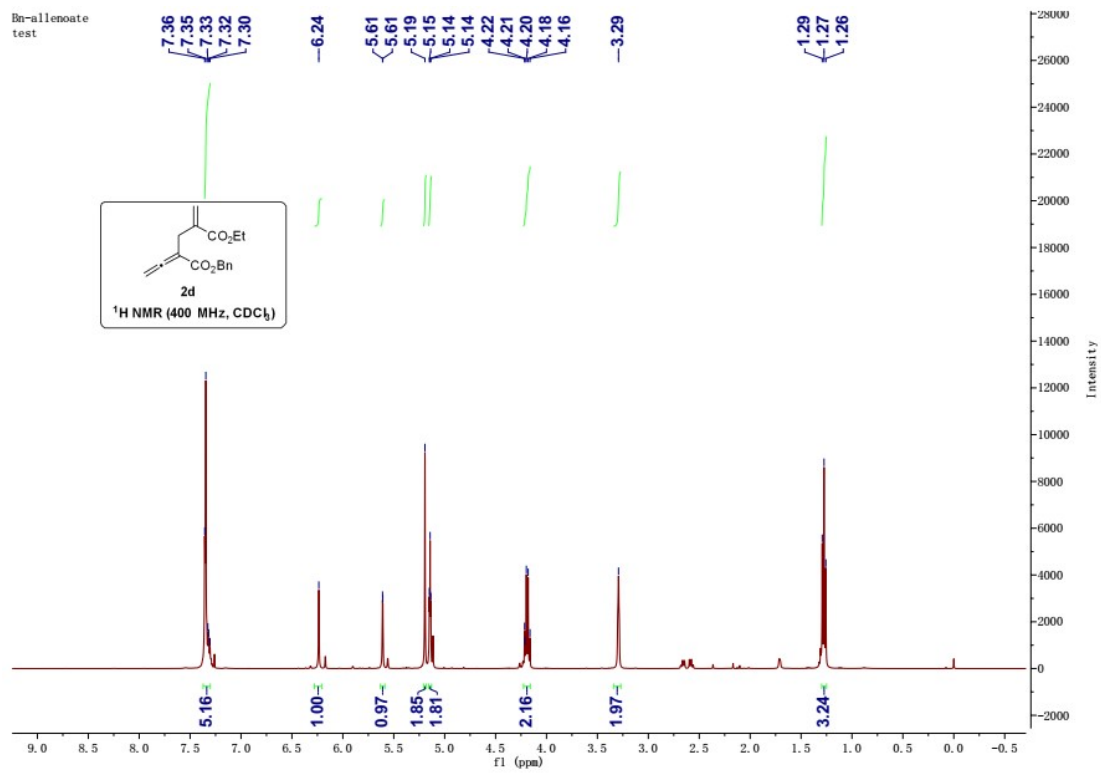

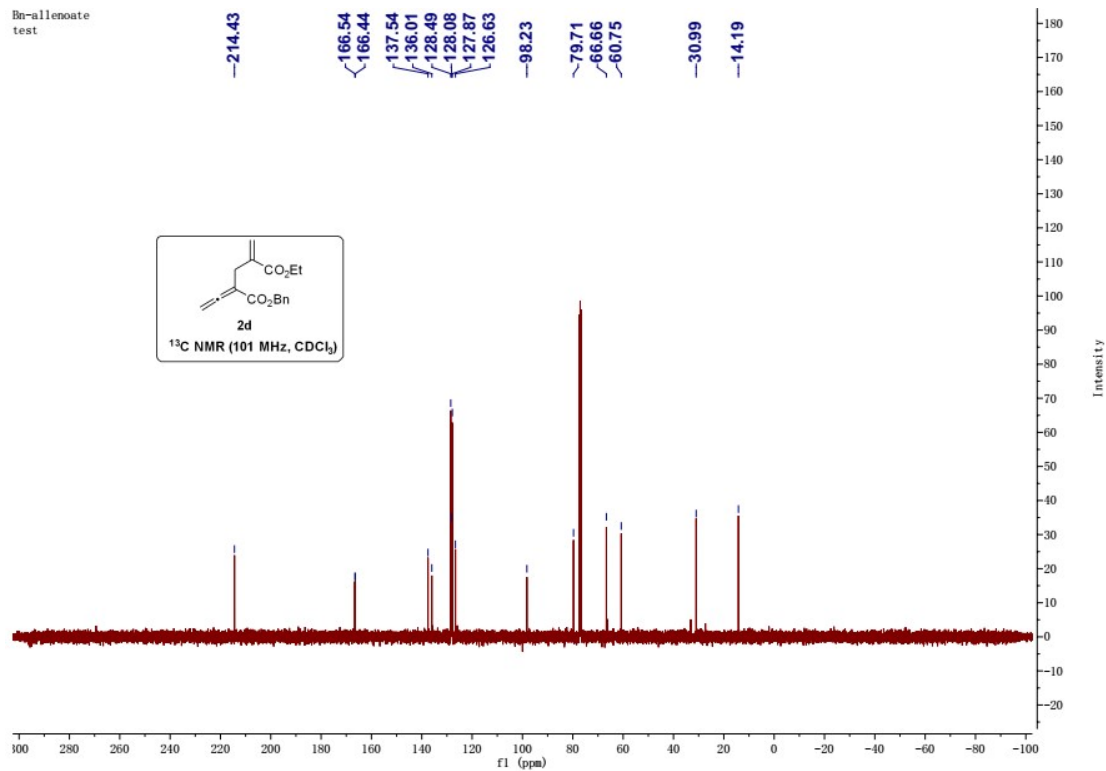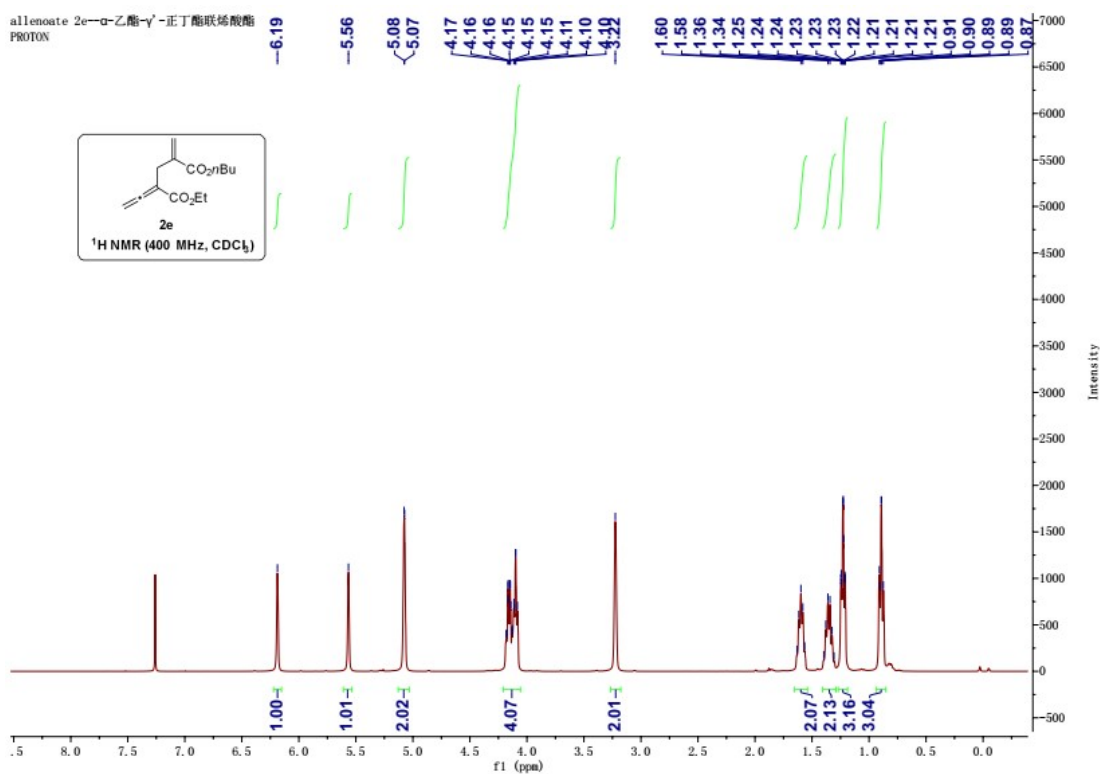

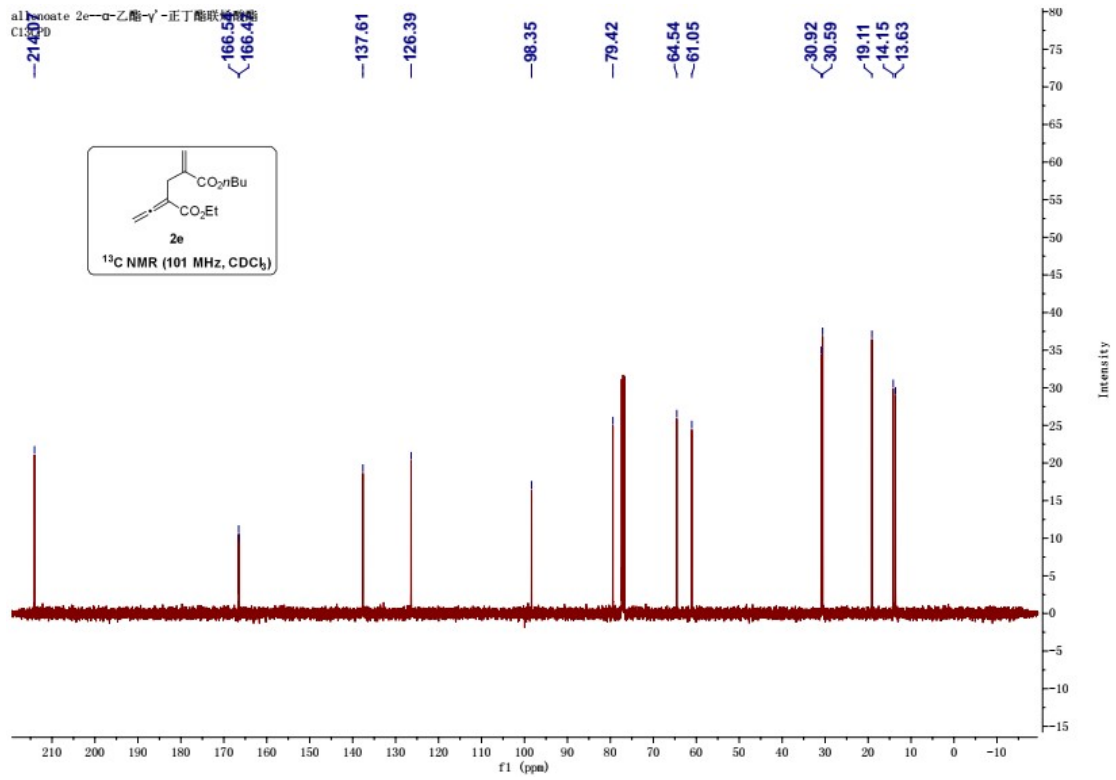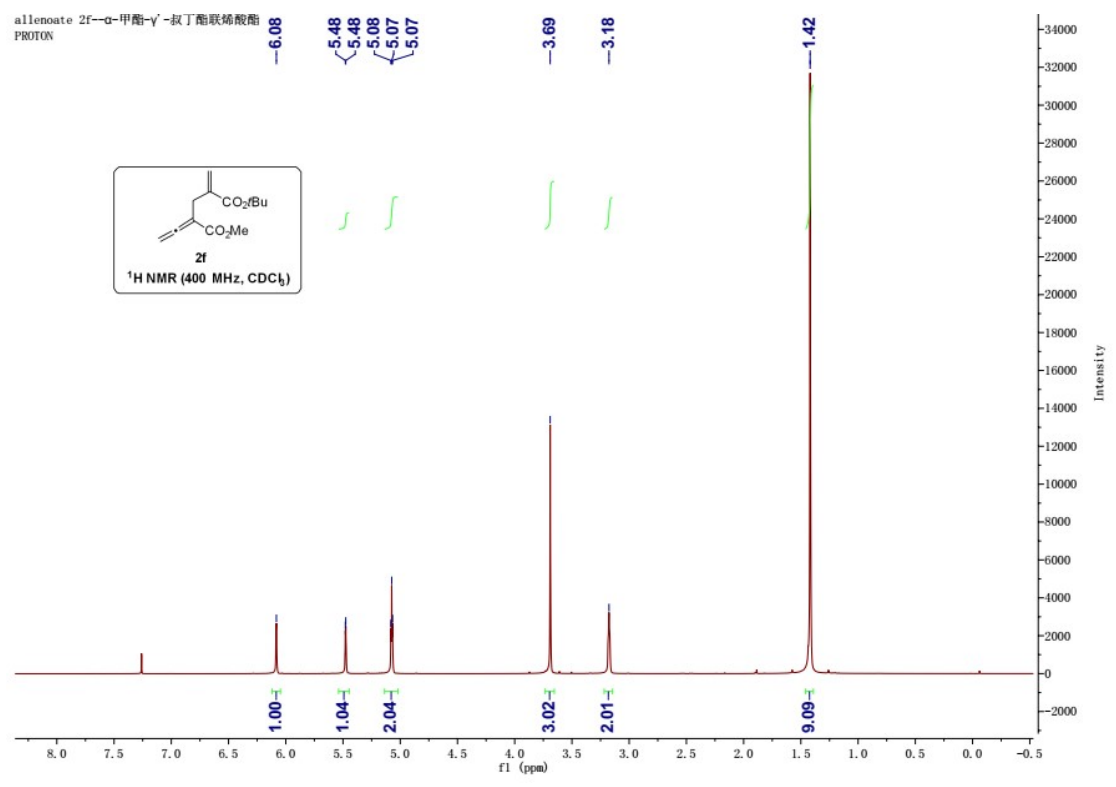

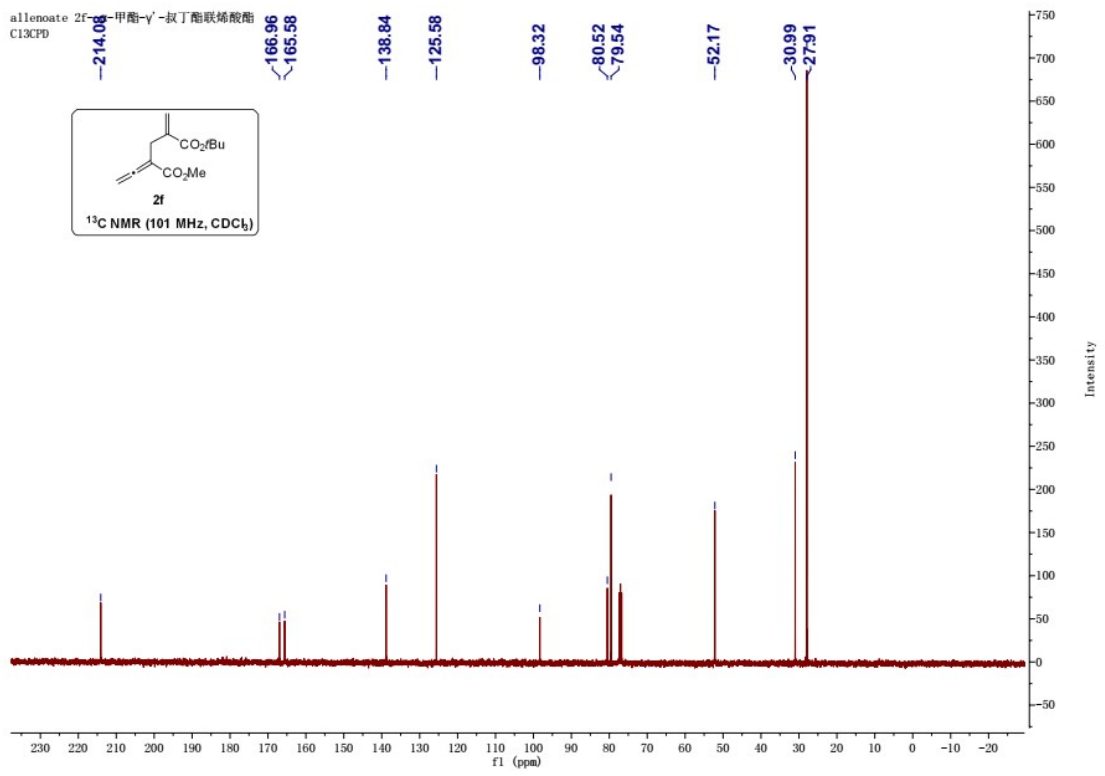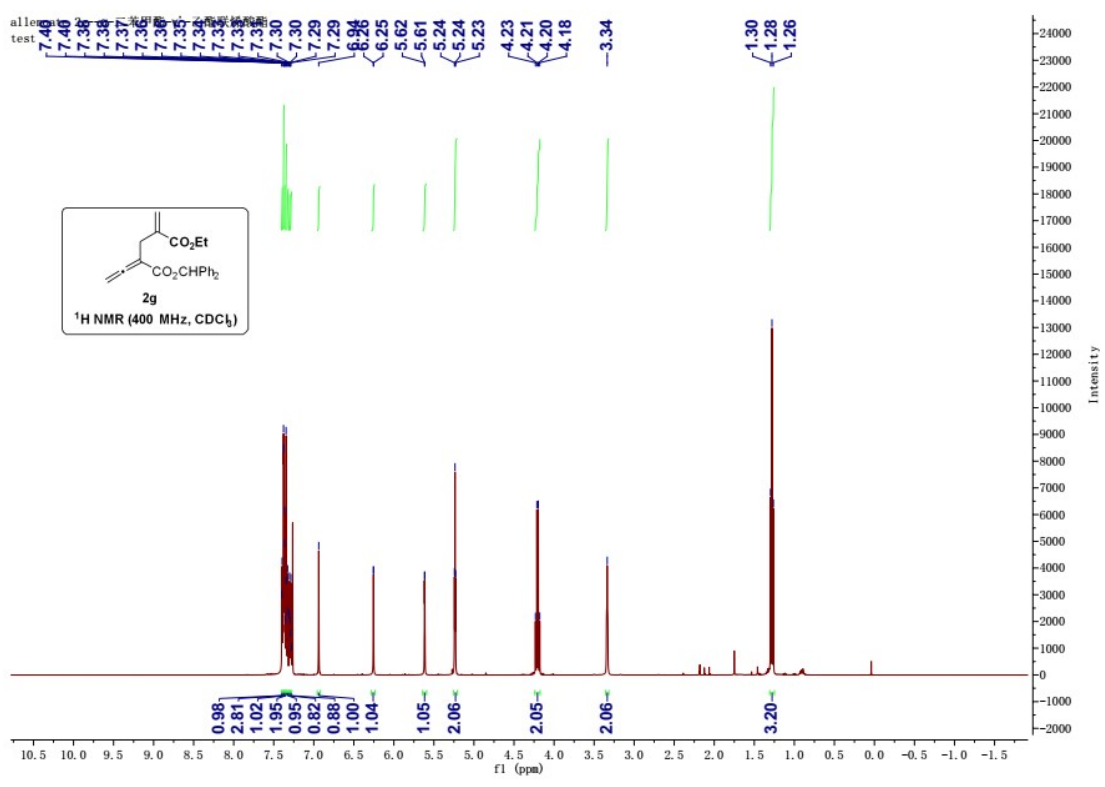

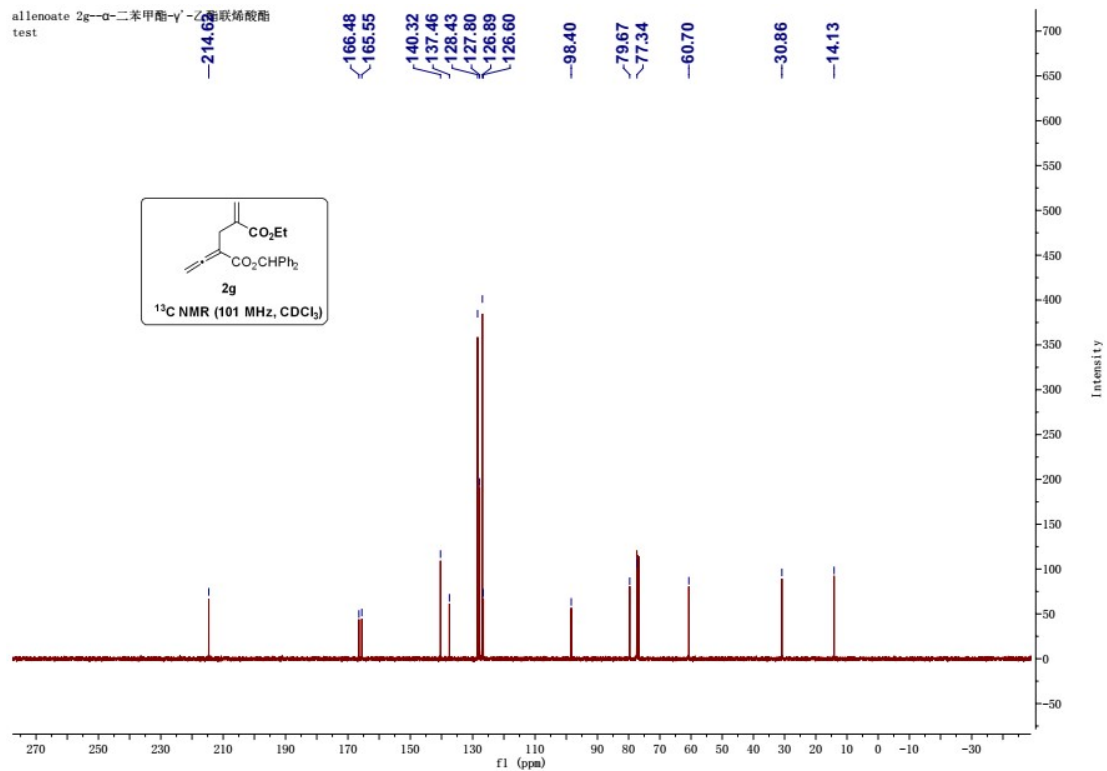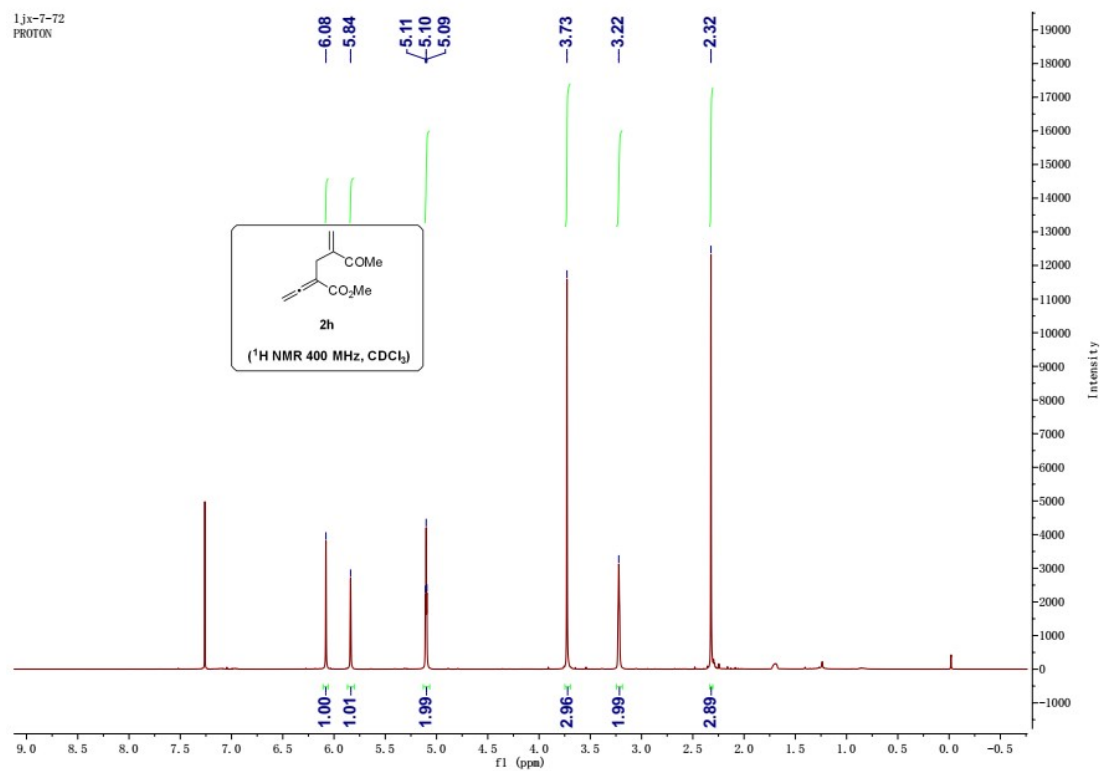



ljx-7-72  
C13CPD

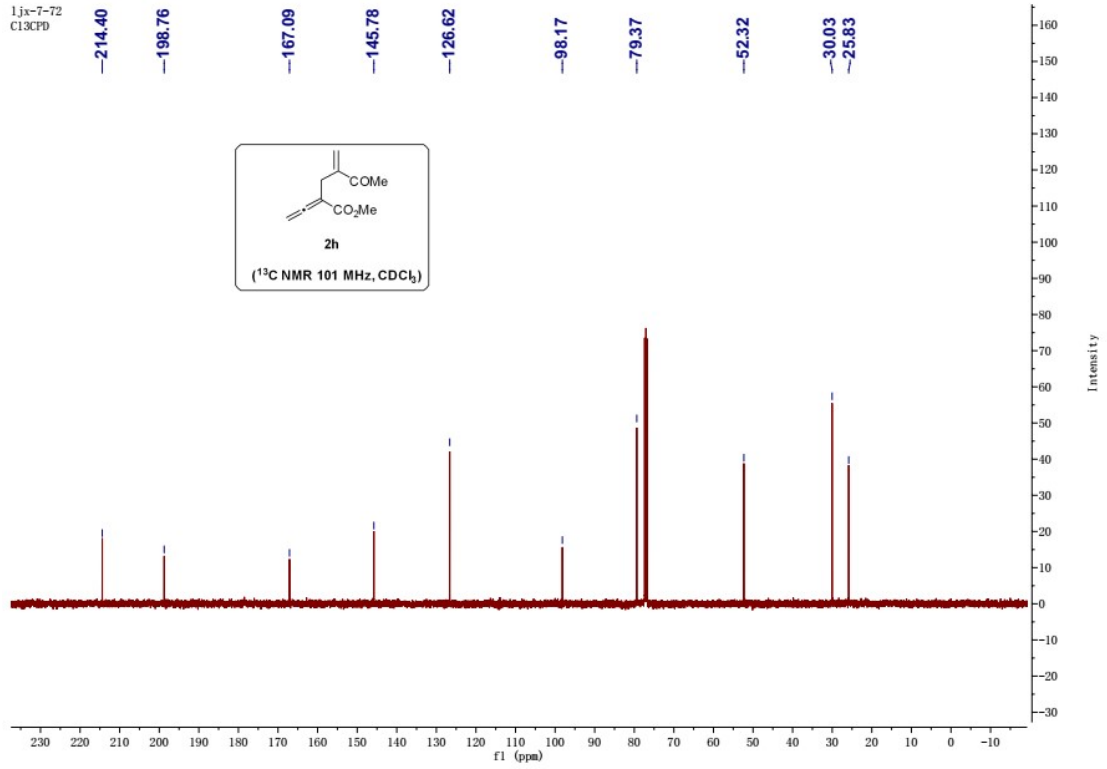

gamma-me-allenoate  
PROTON

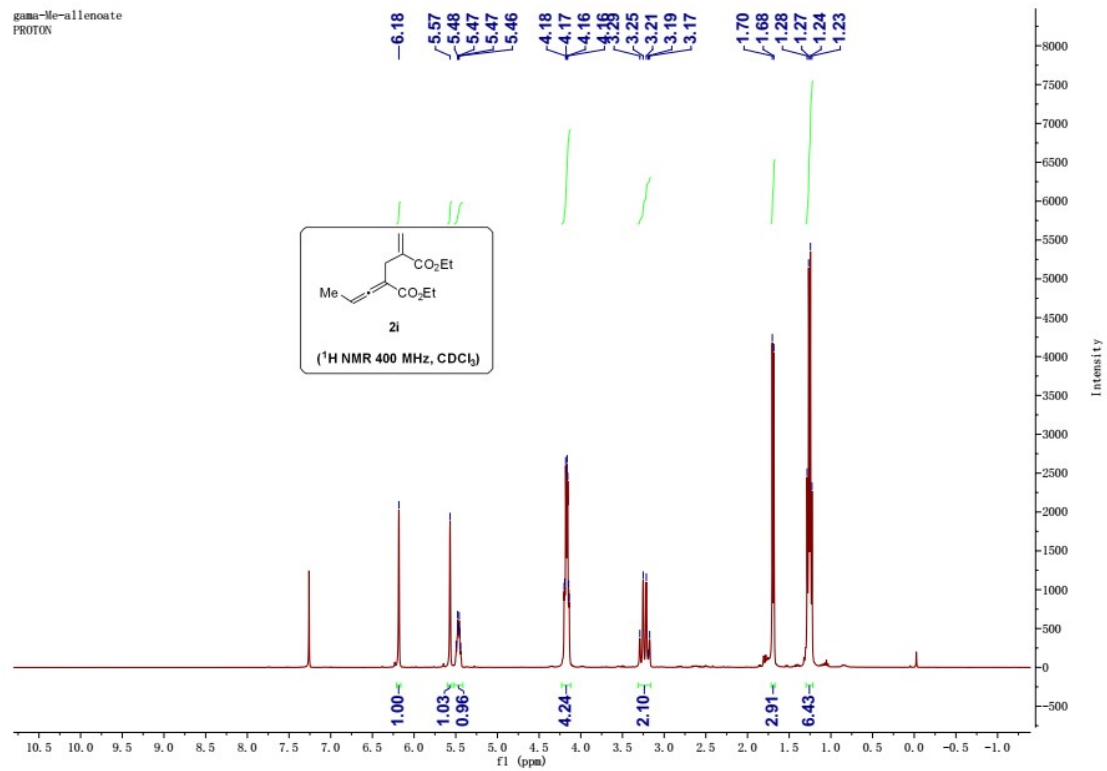

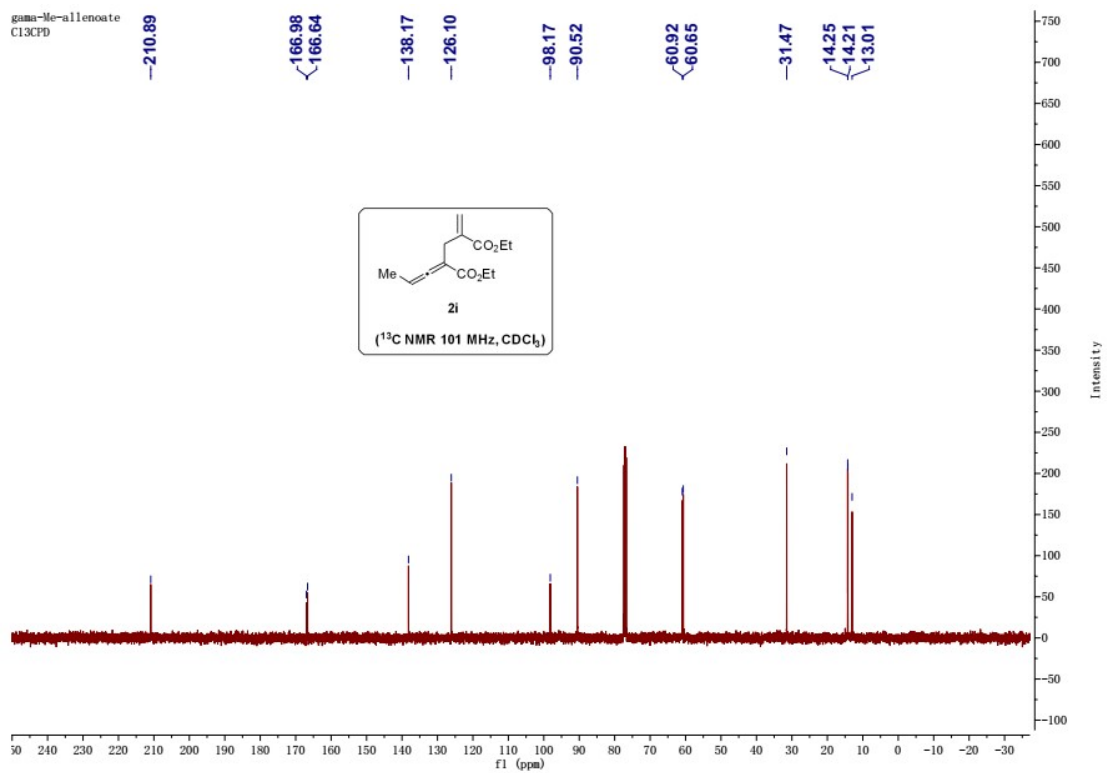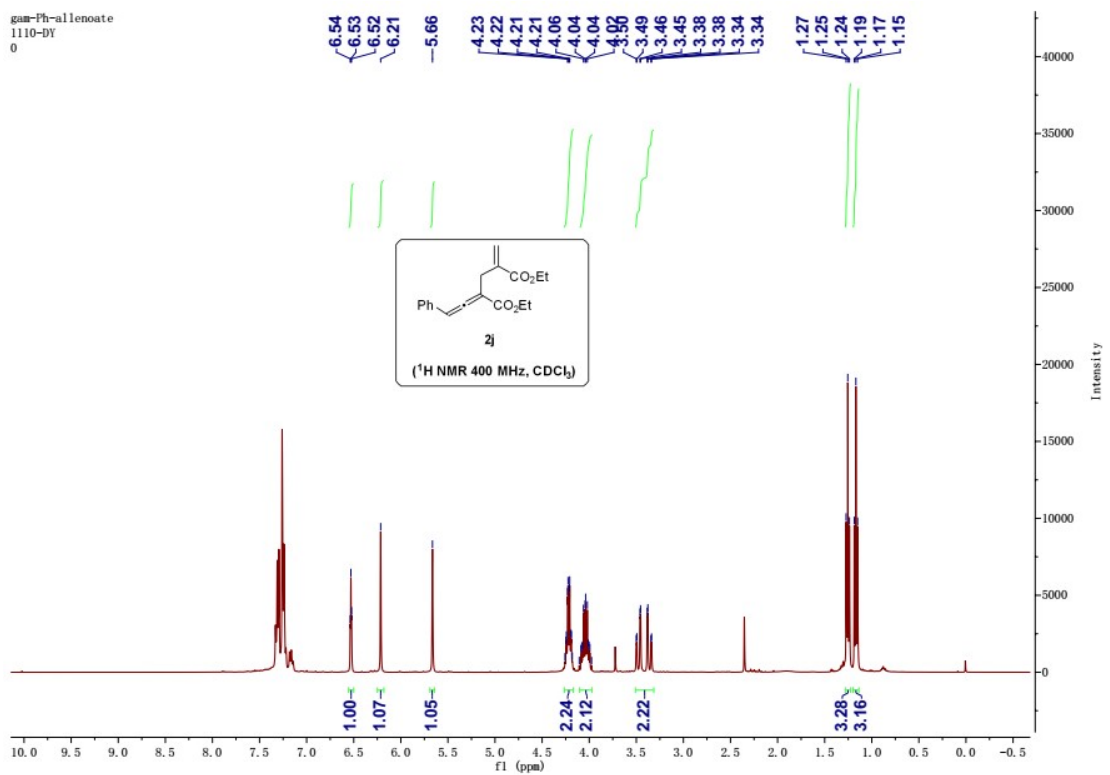

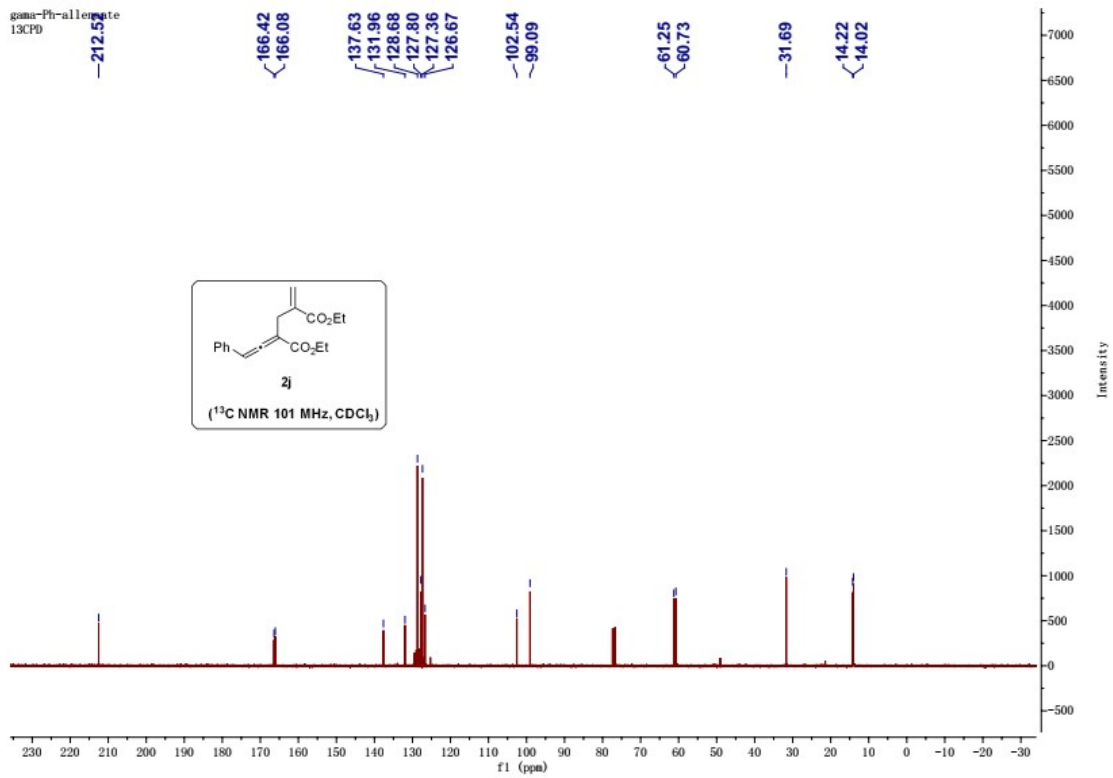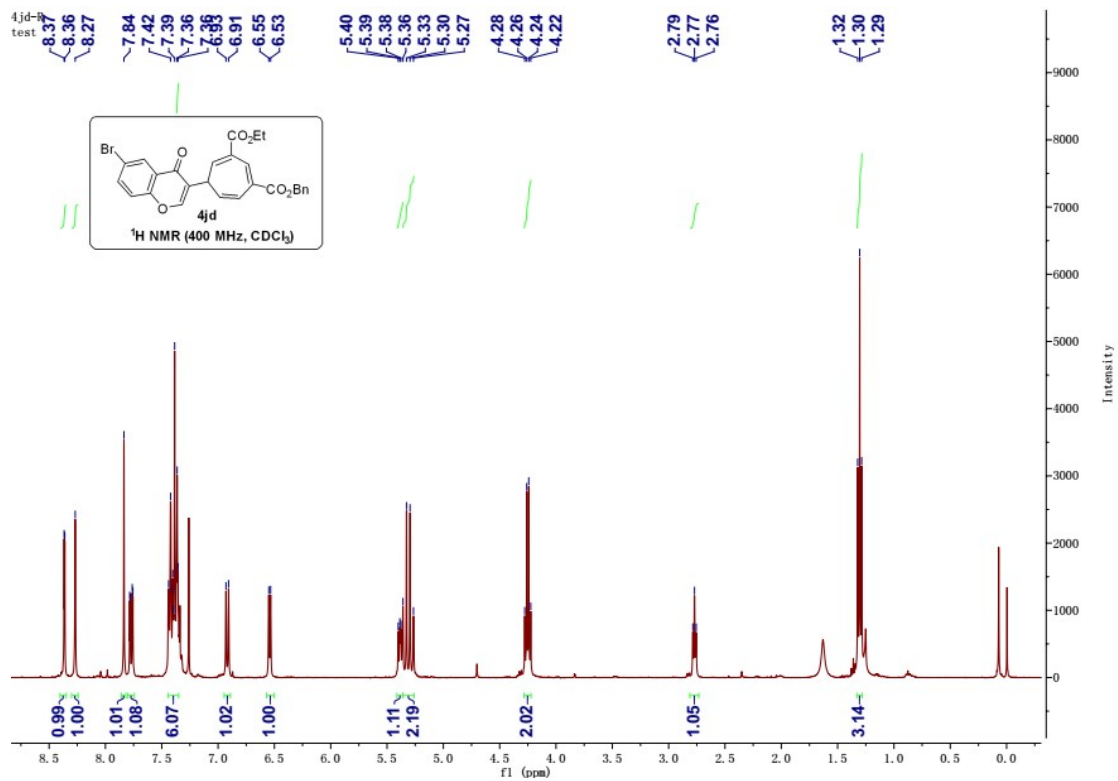

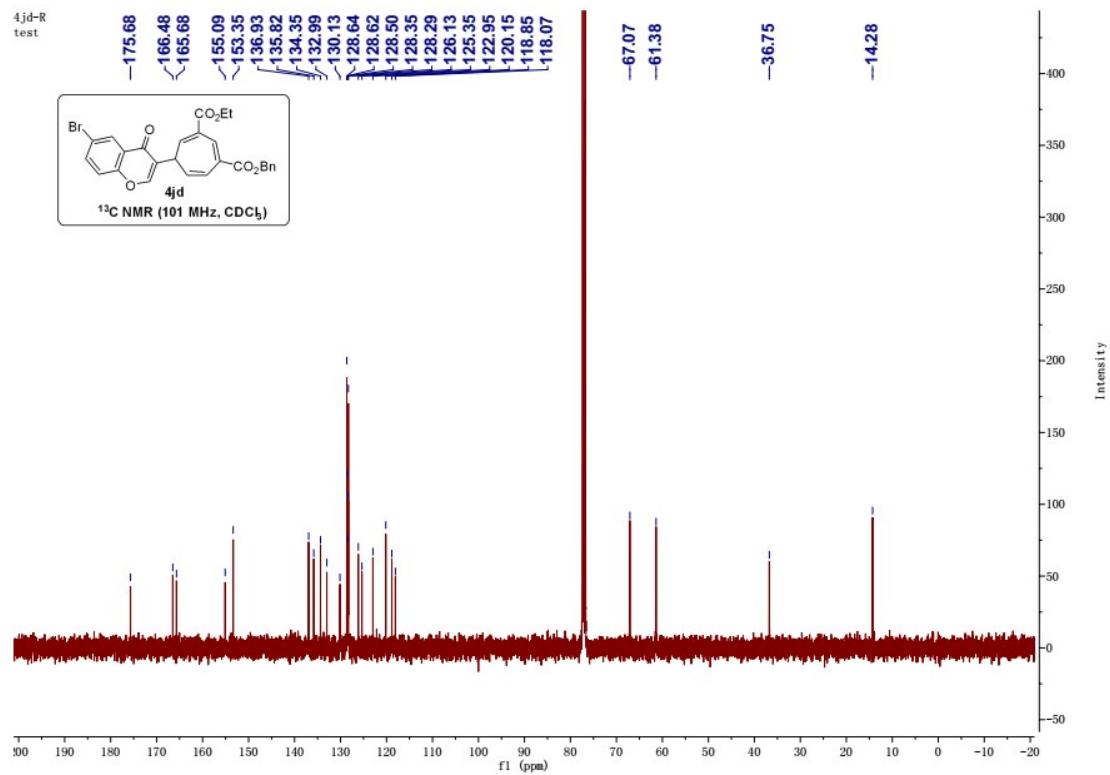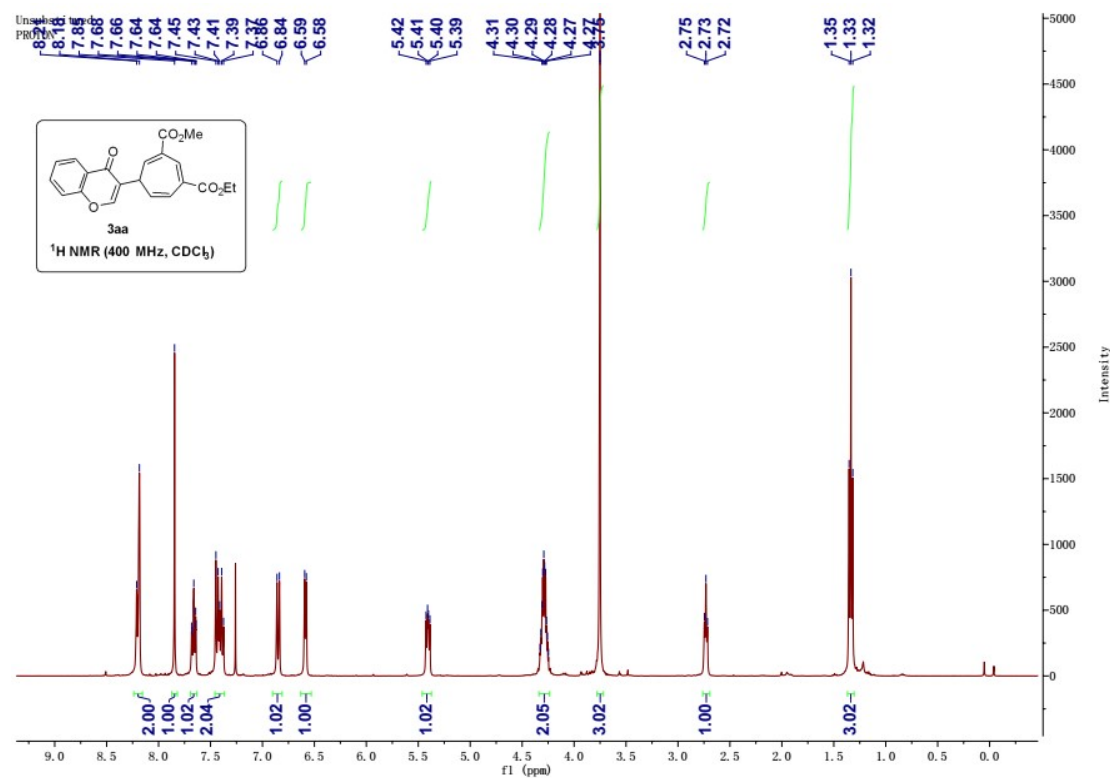

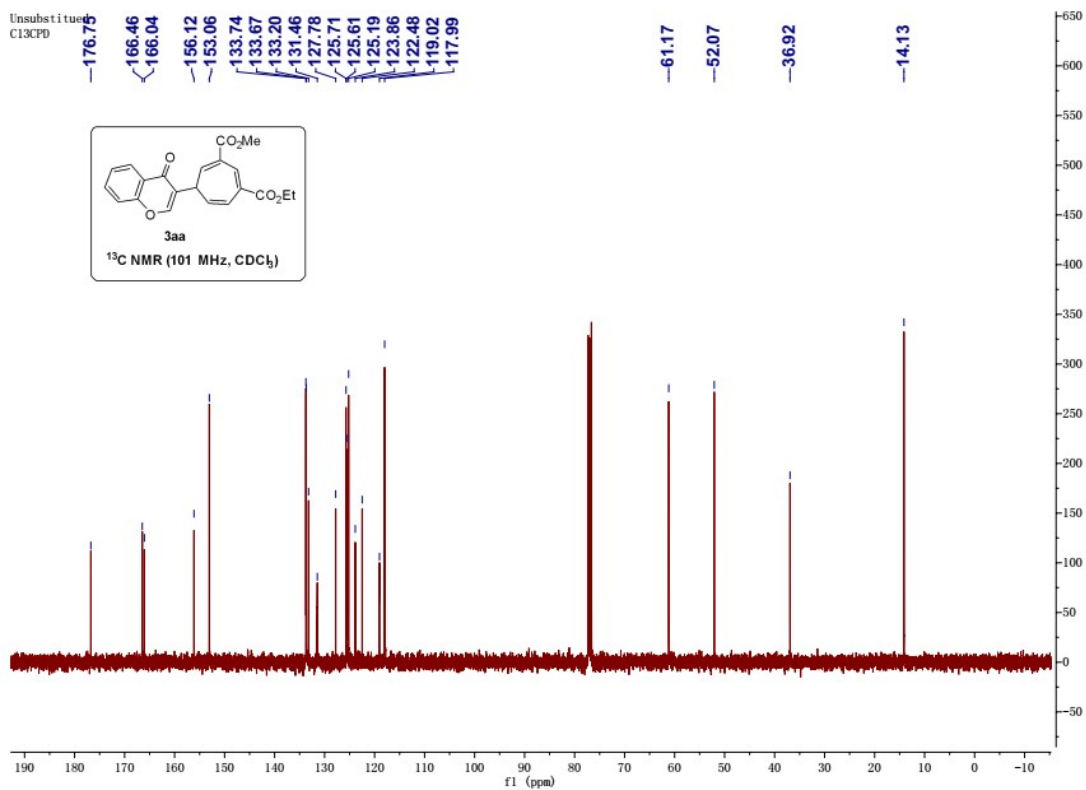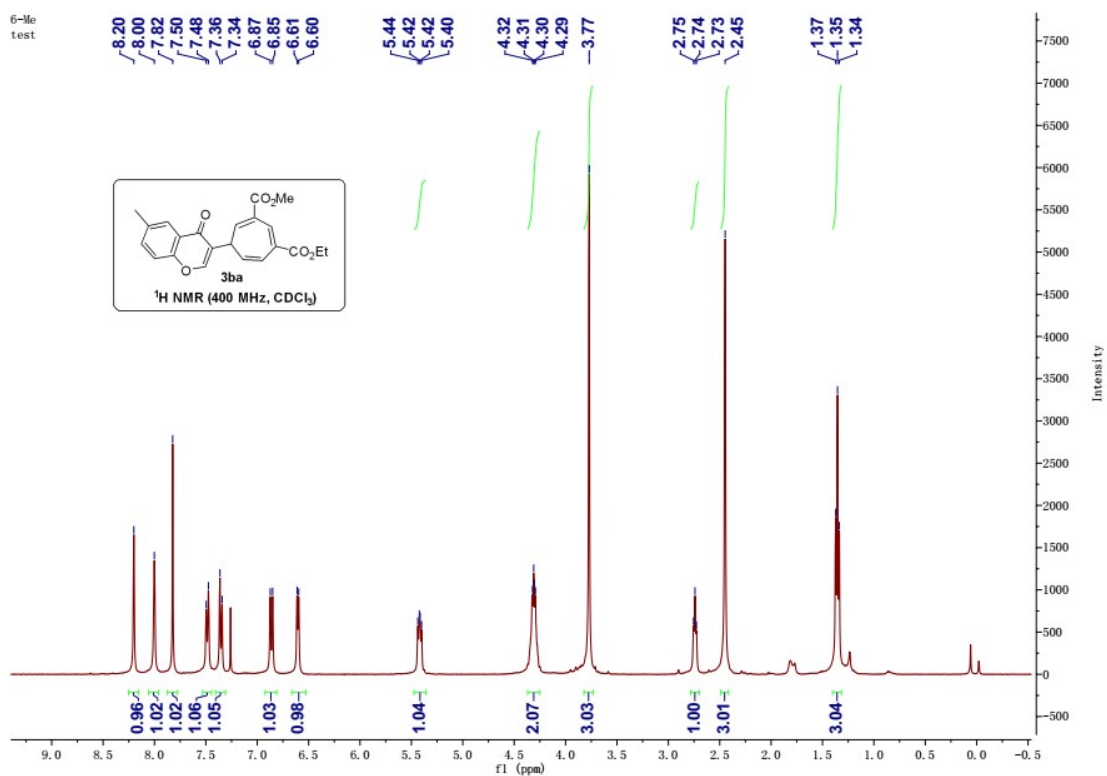

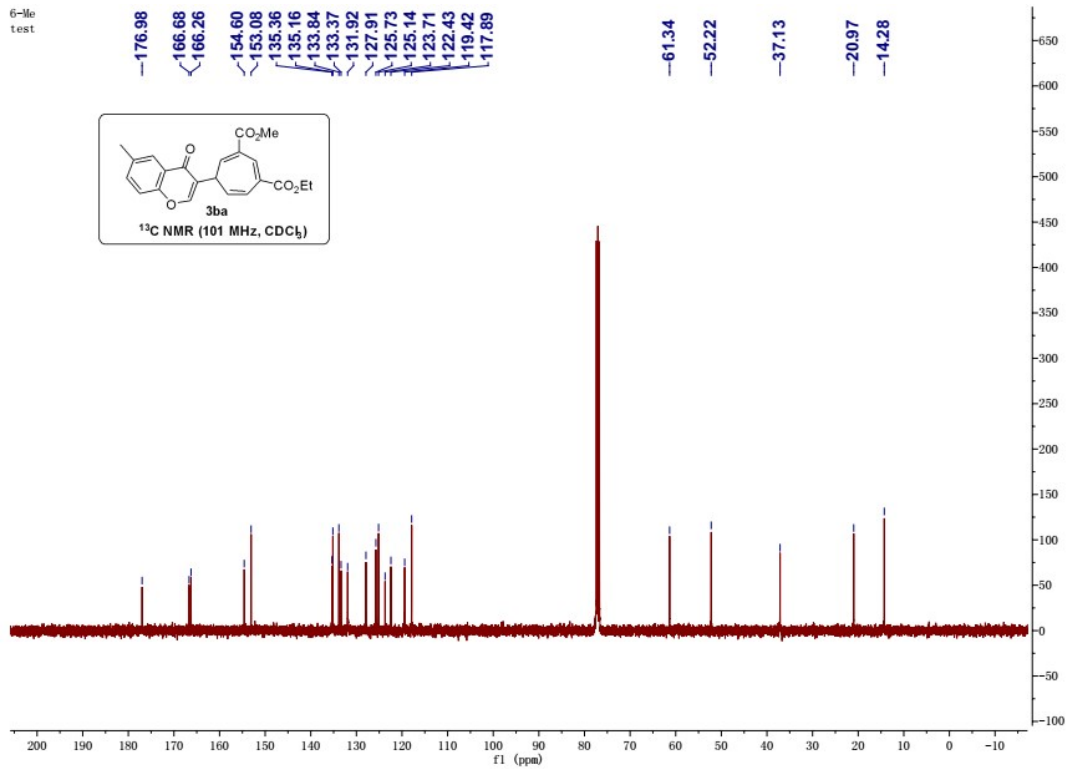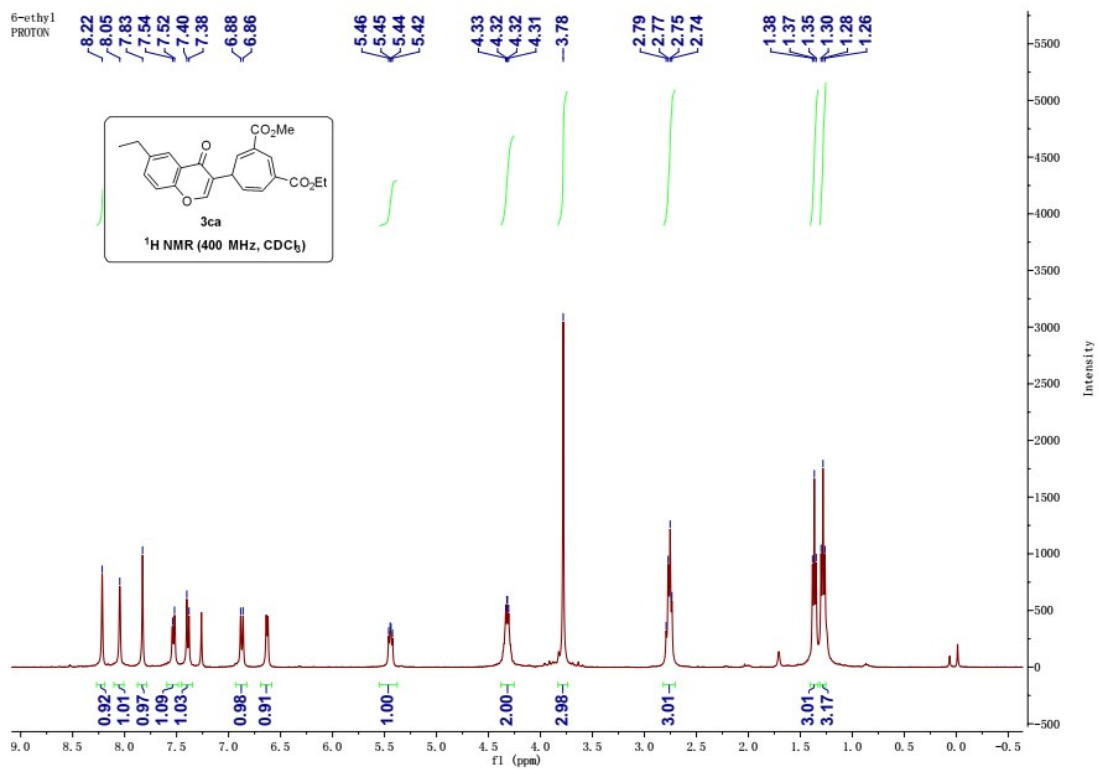

6-ethyl  
C13CPD

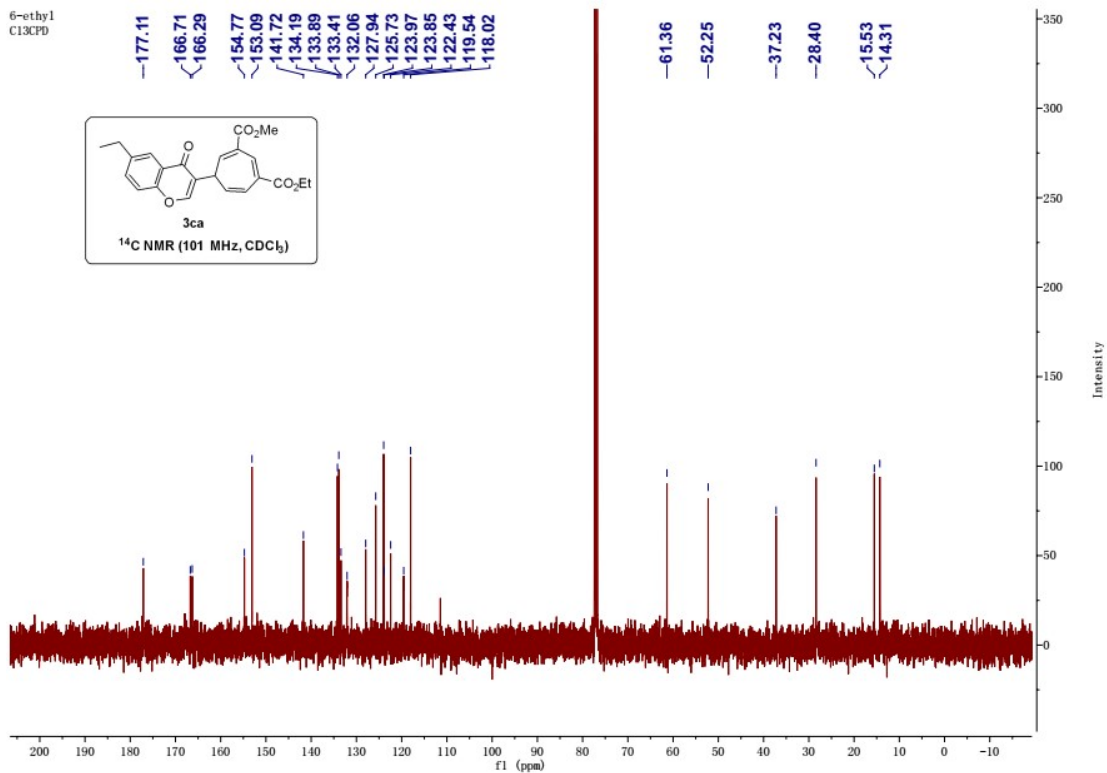

6-isopropyl  
test

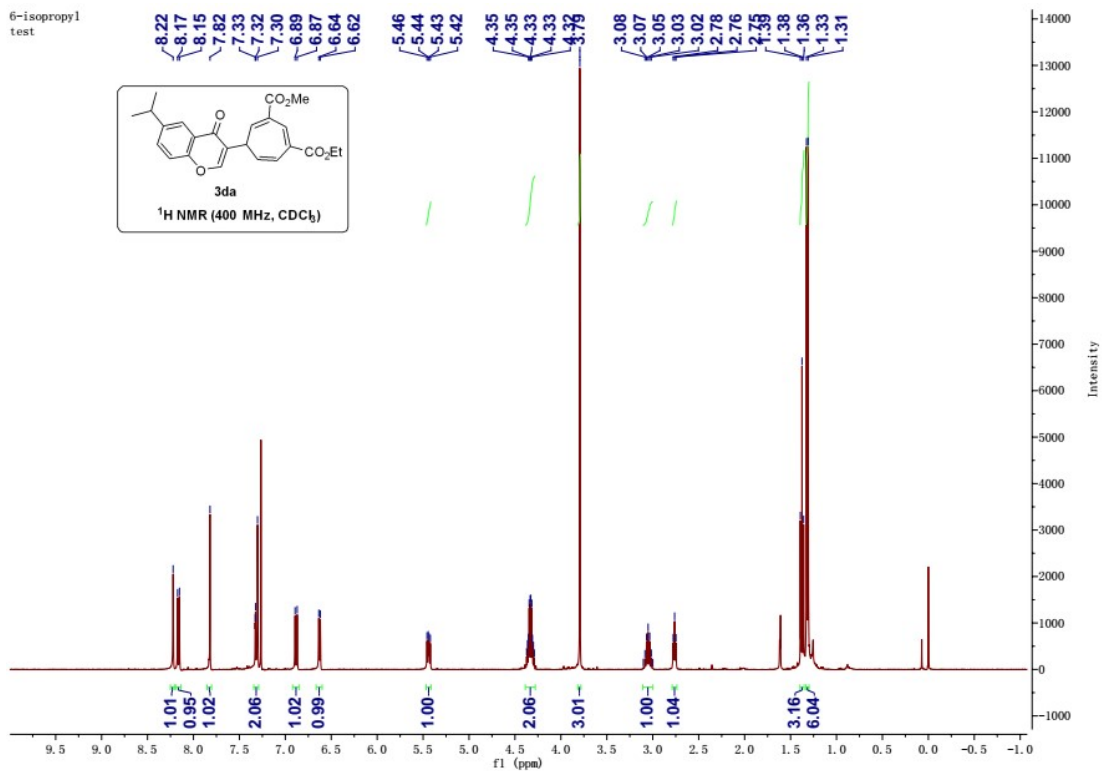

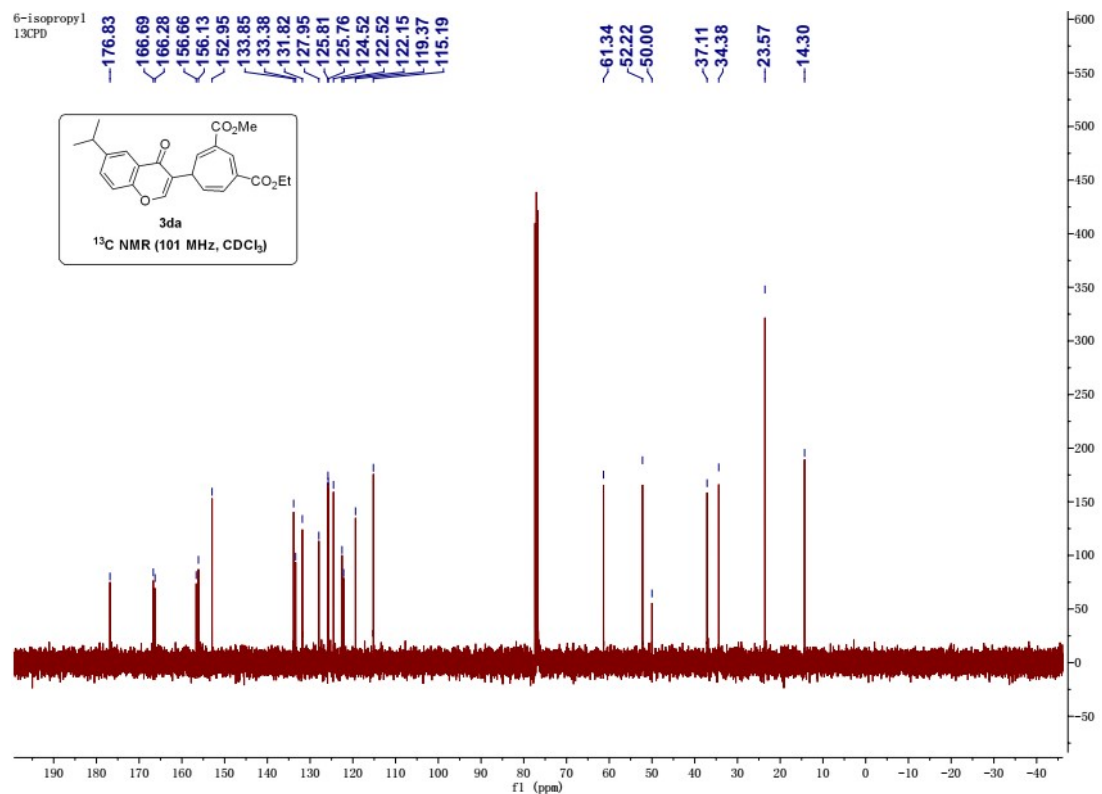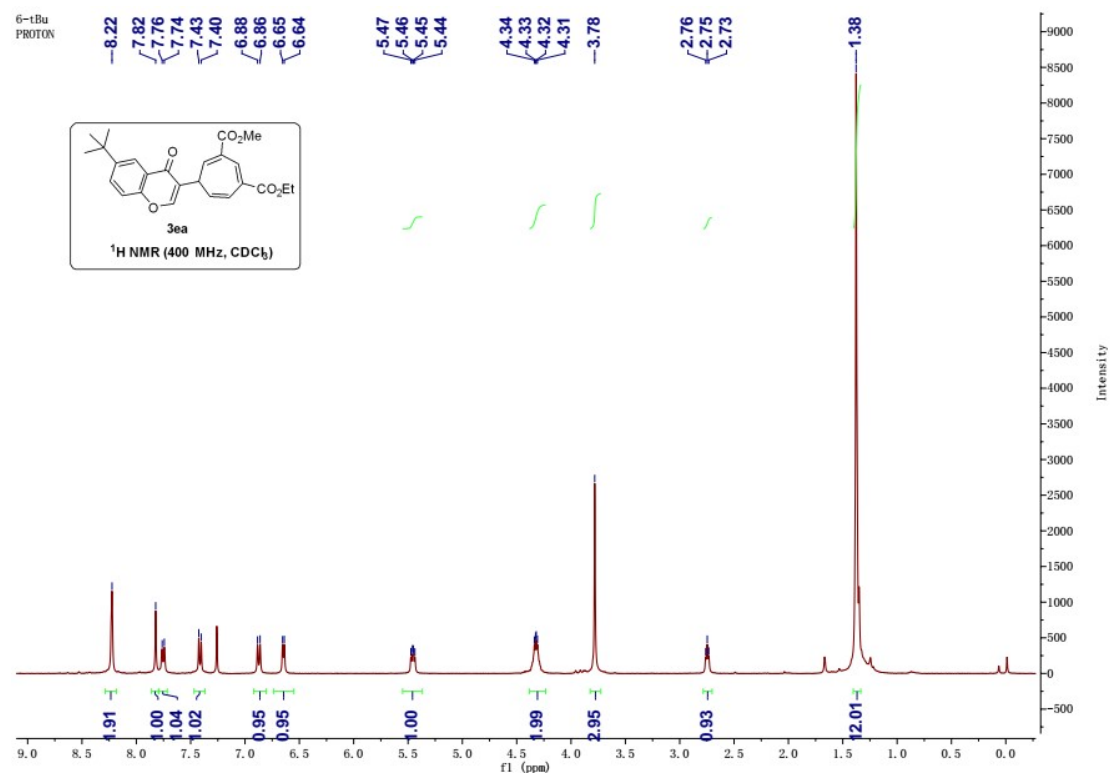



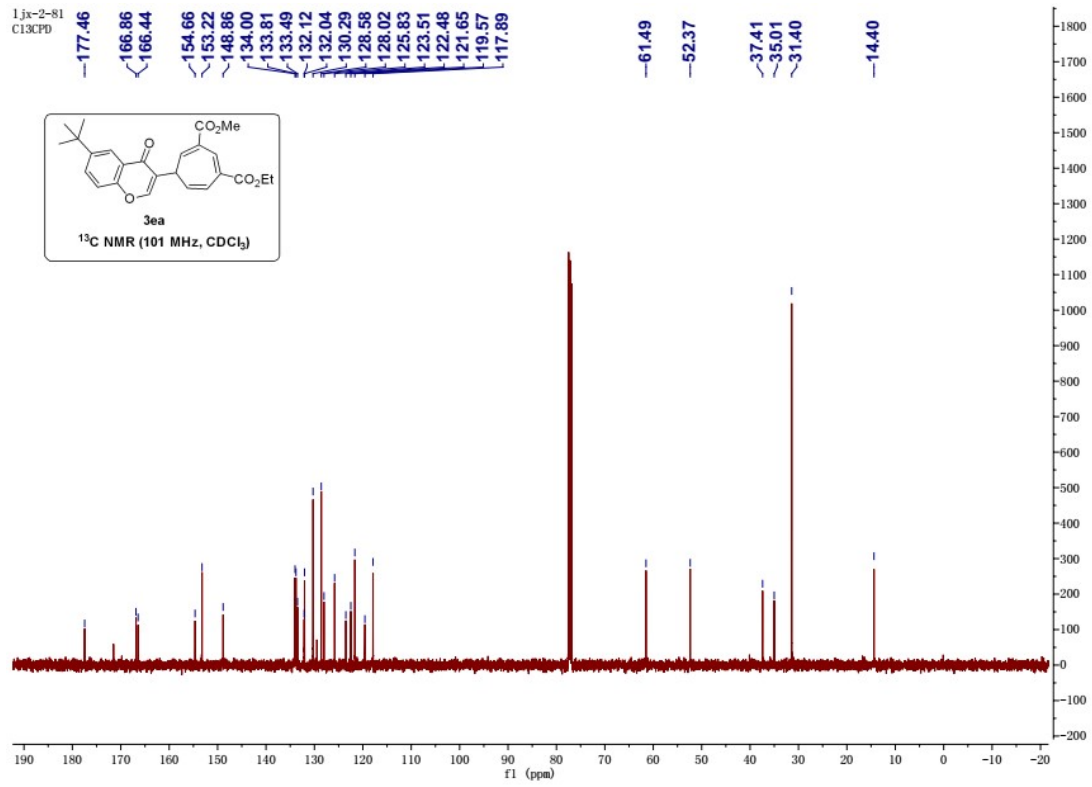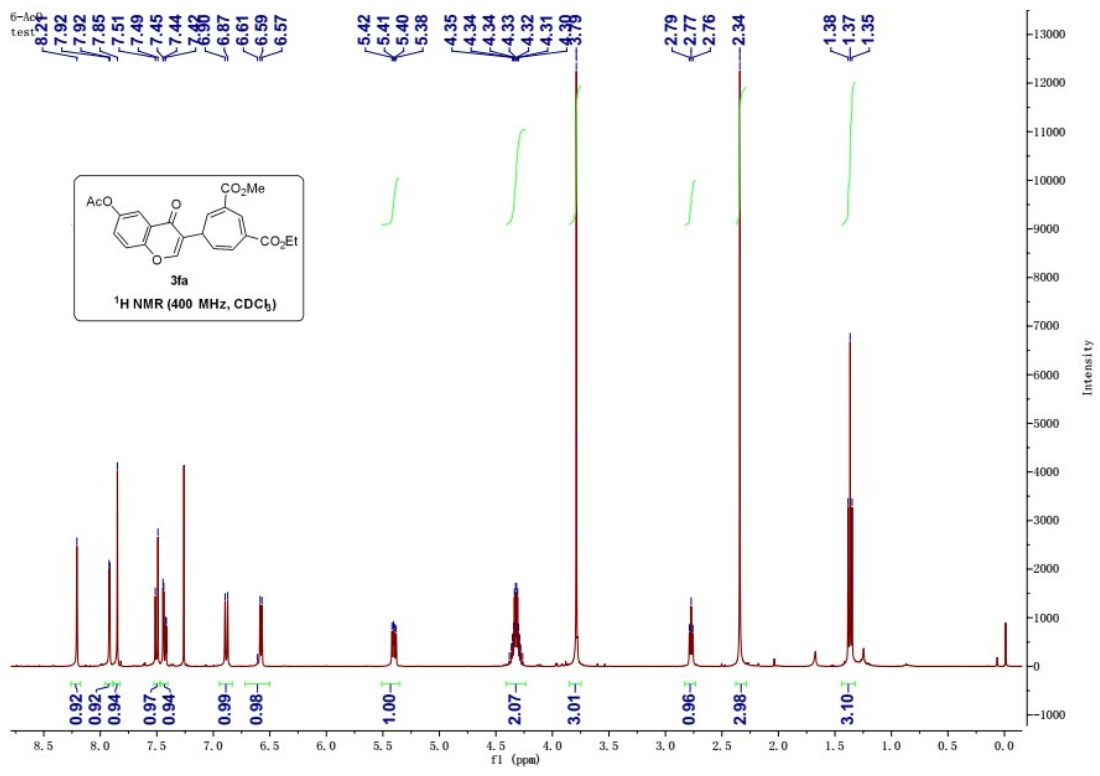

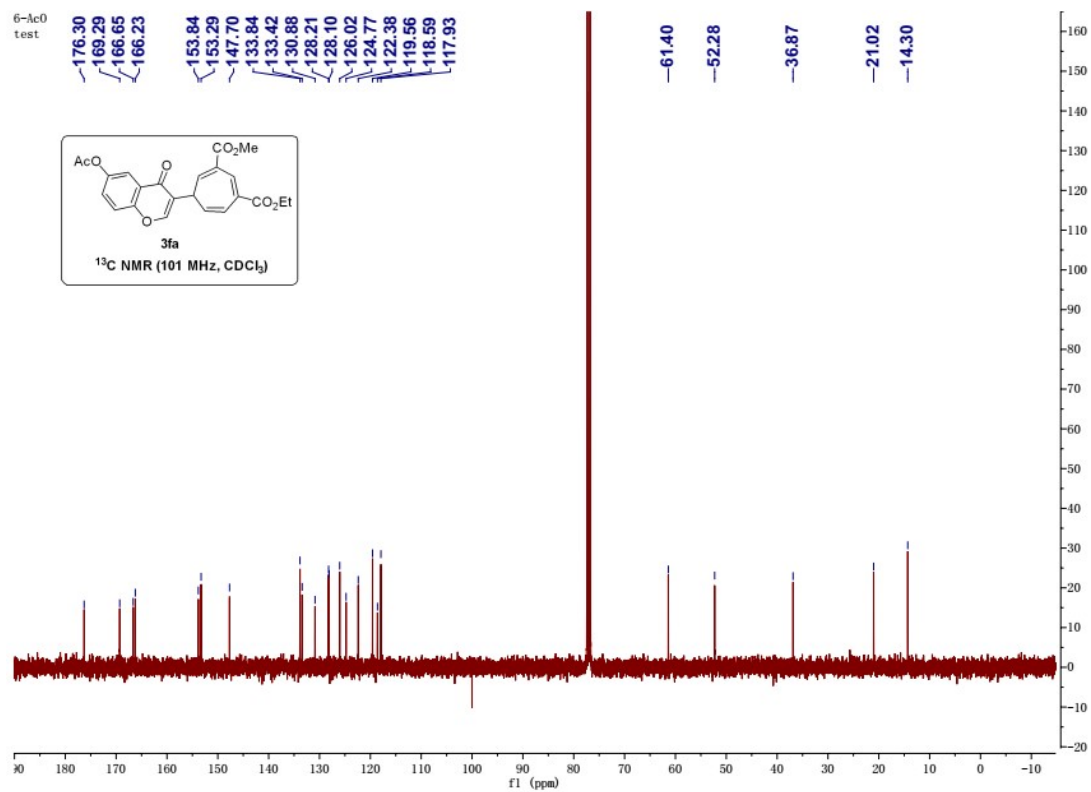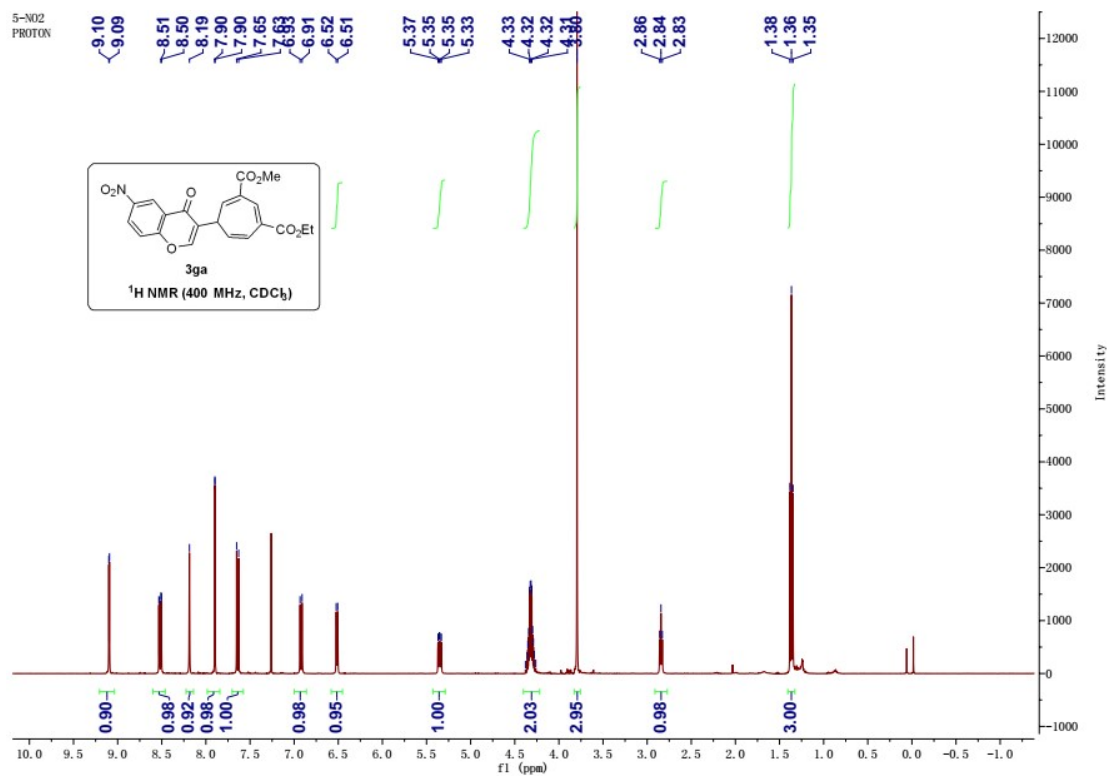

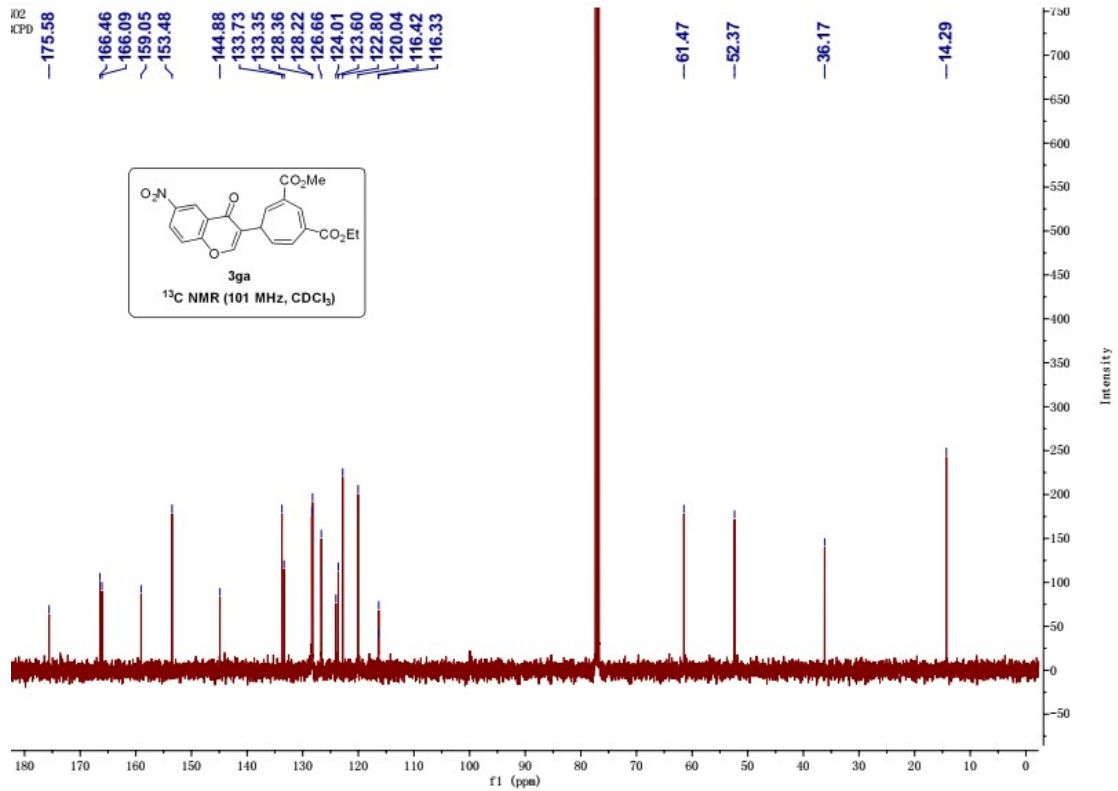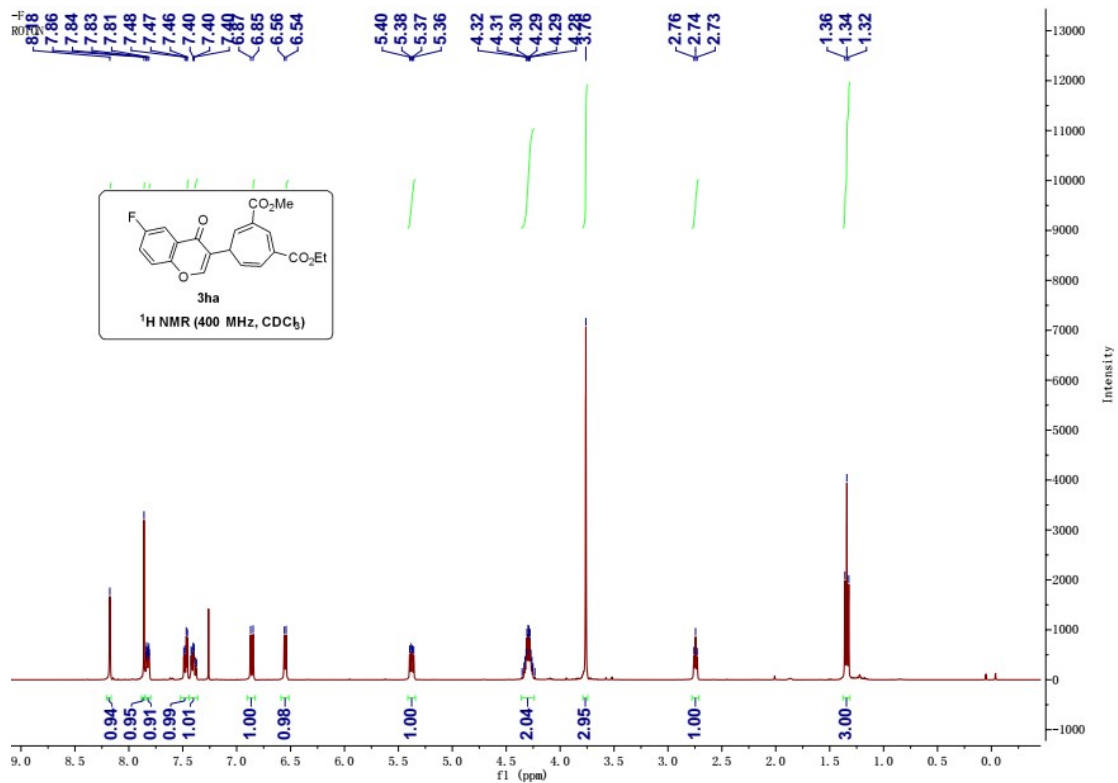

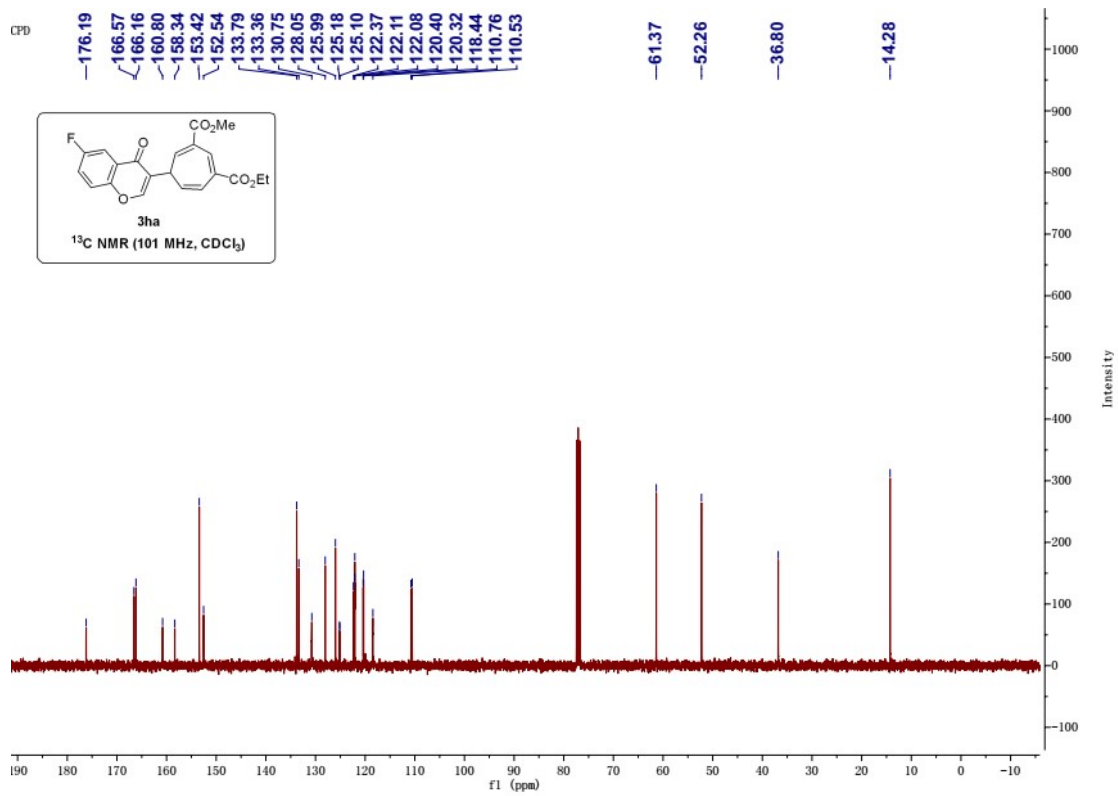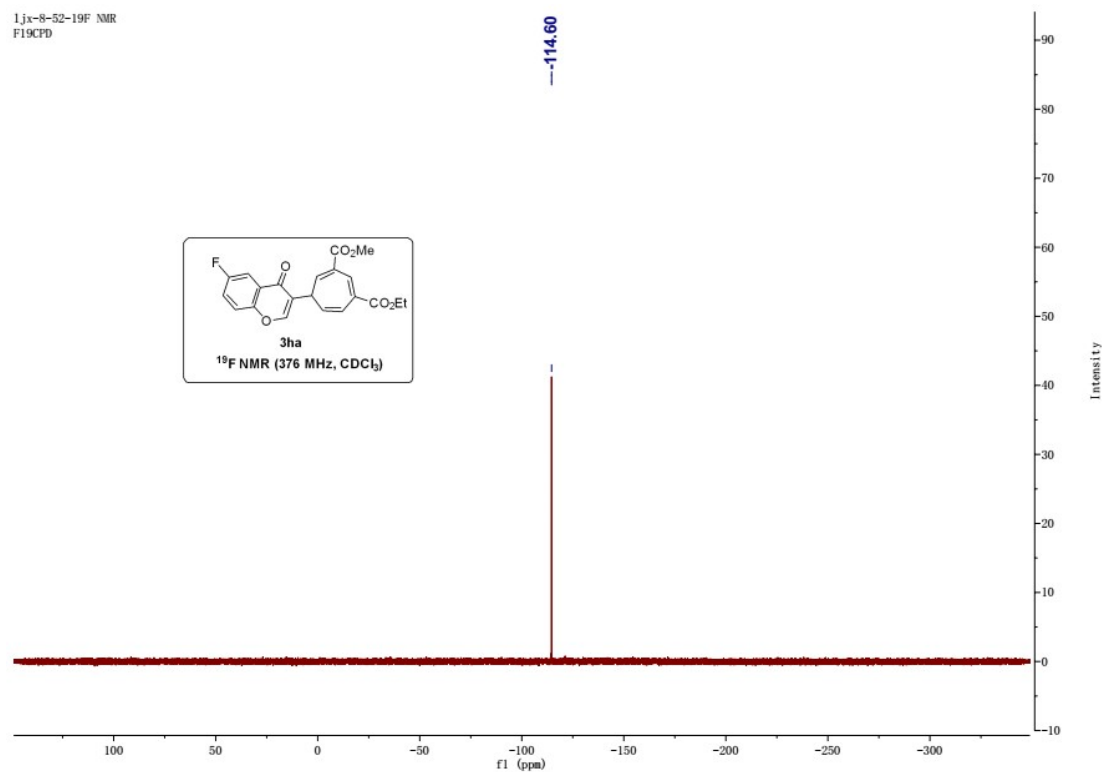

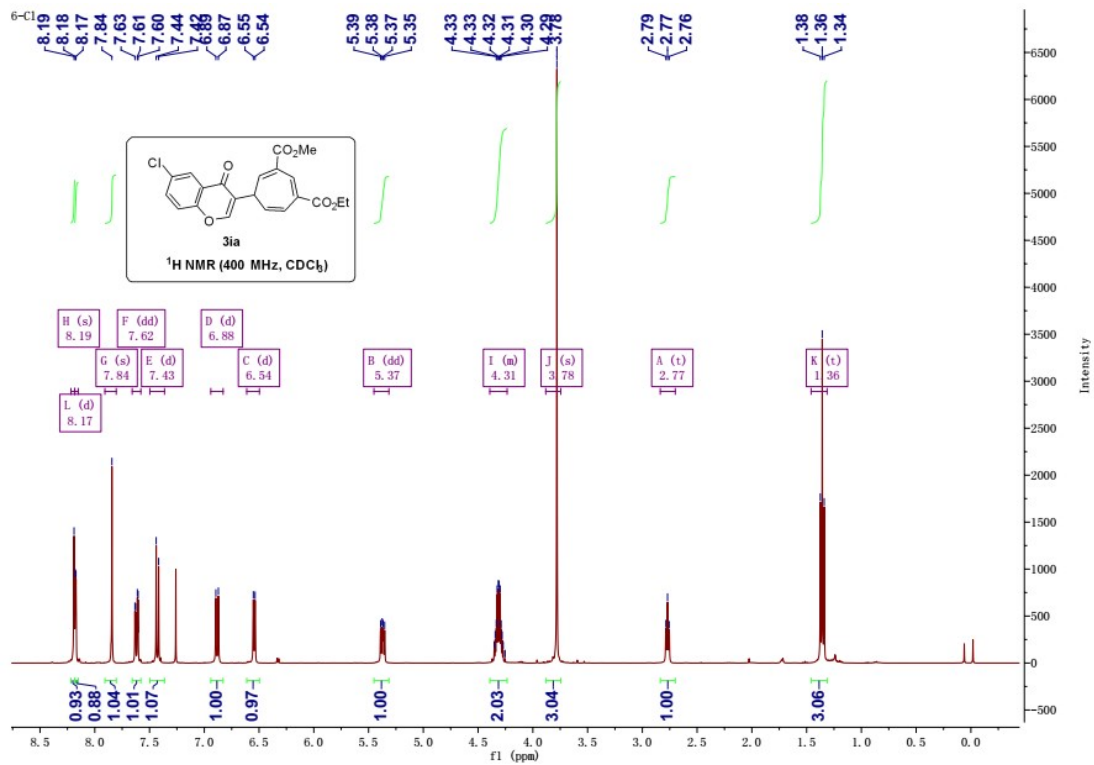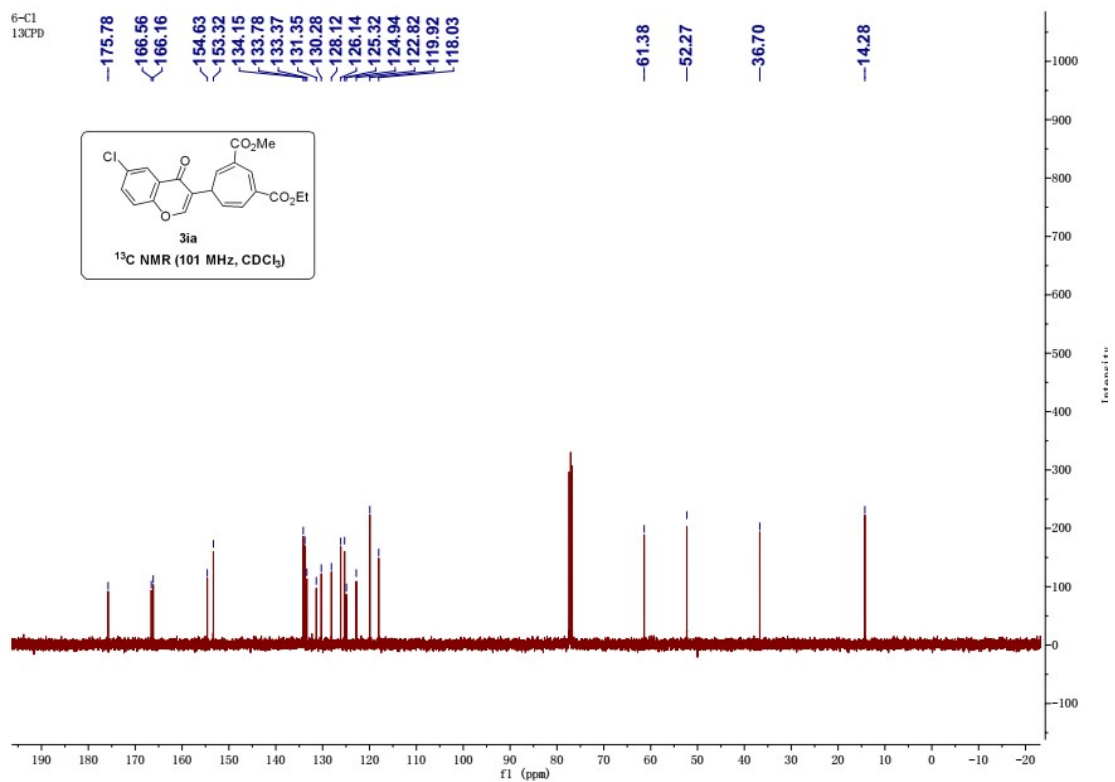

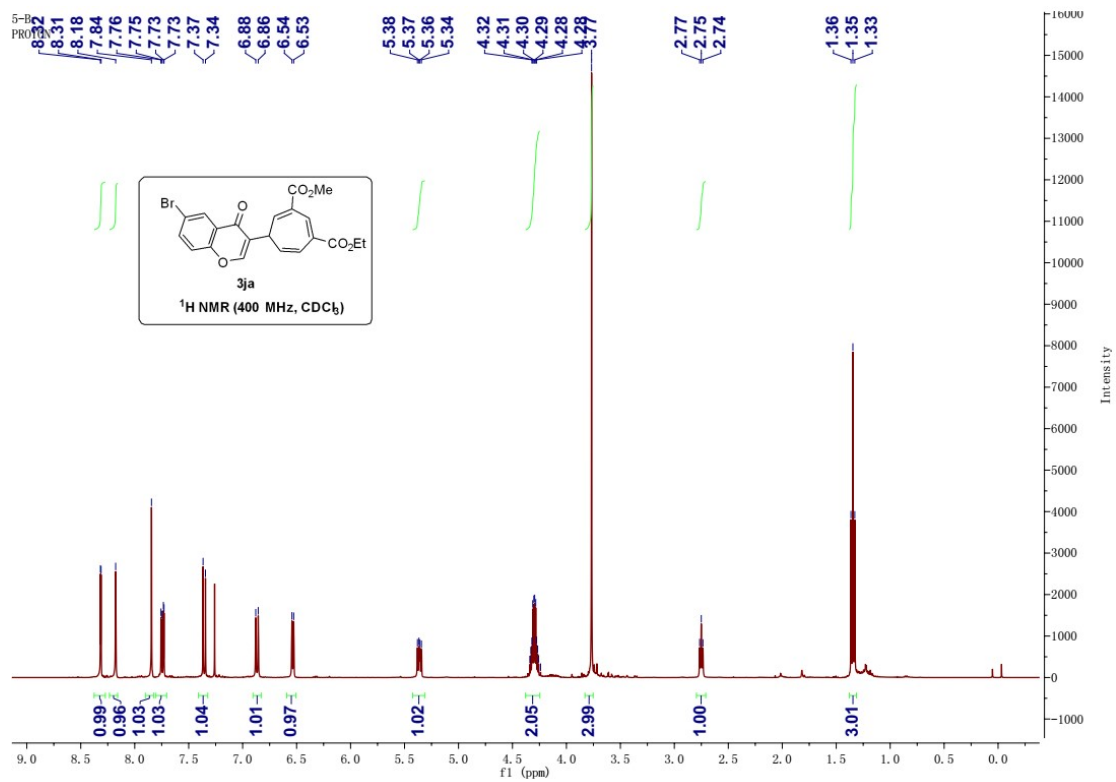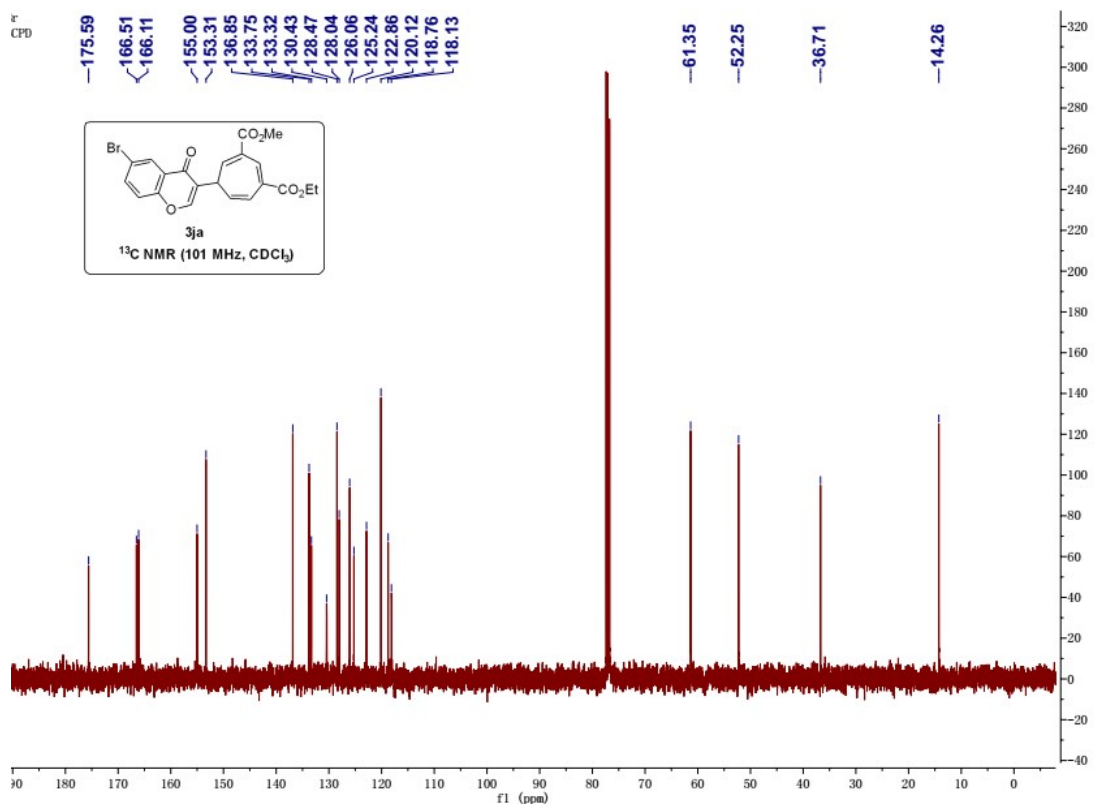

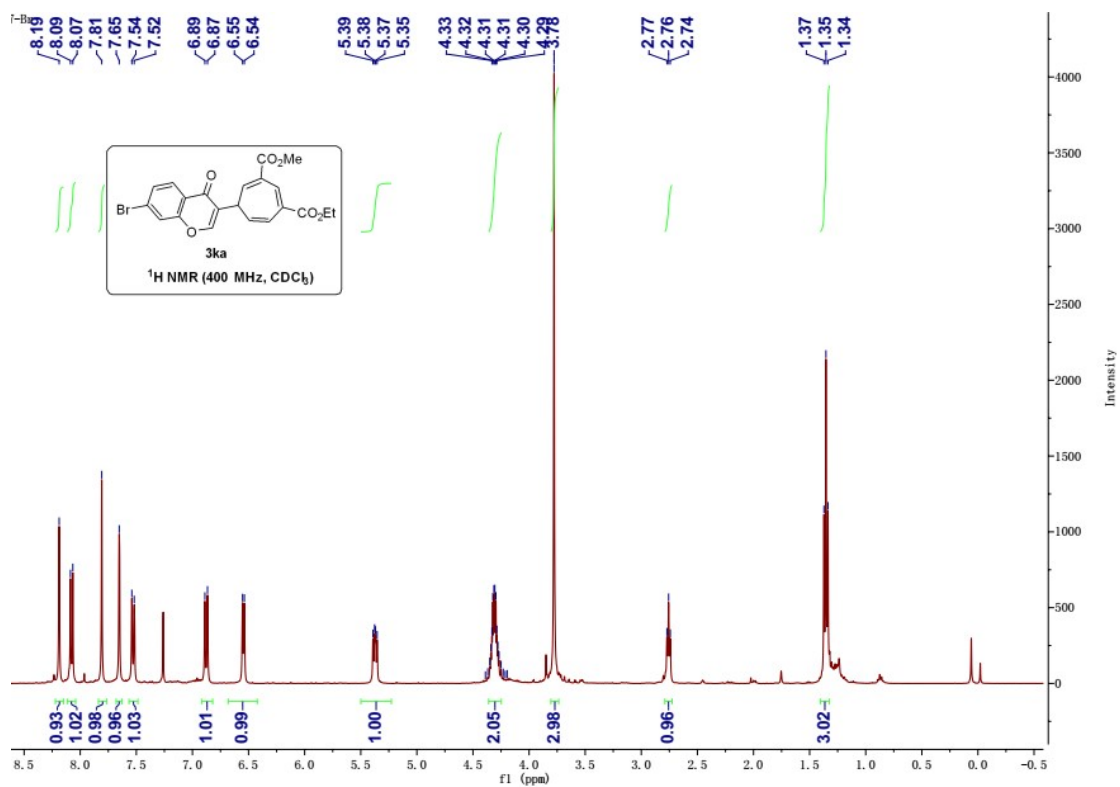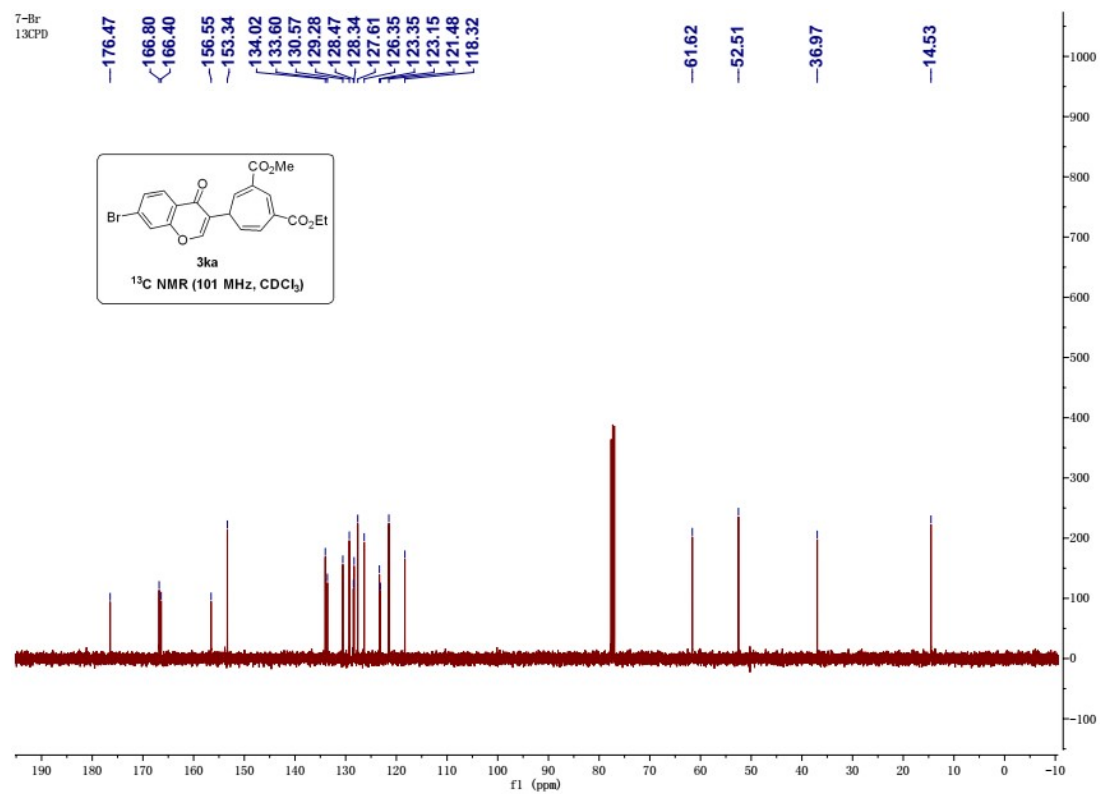

7-MeO  
test

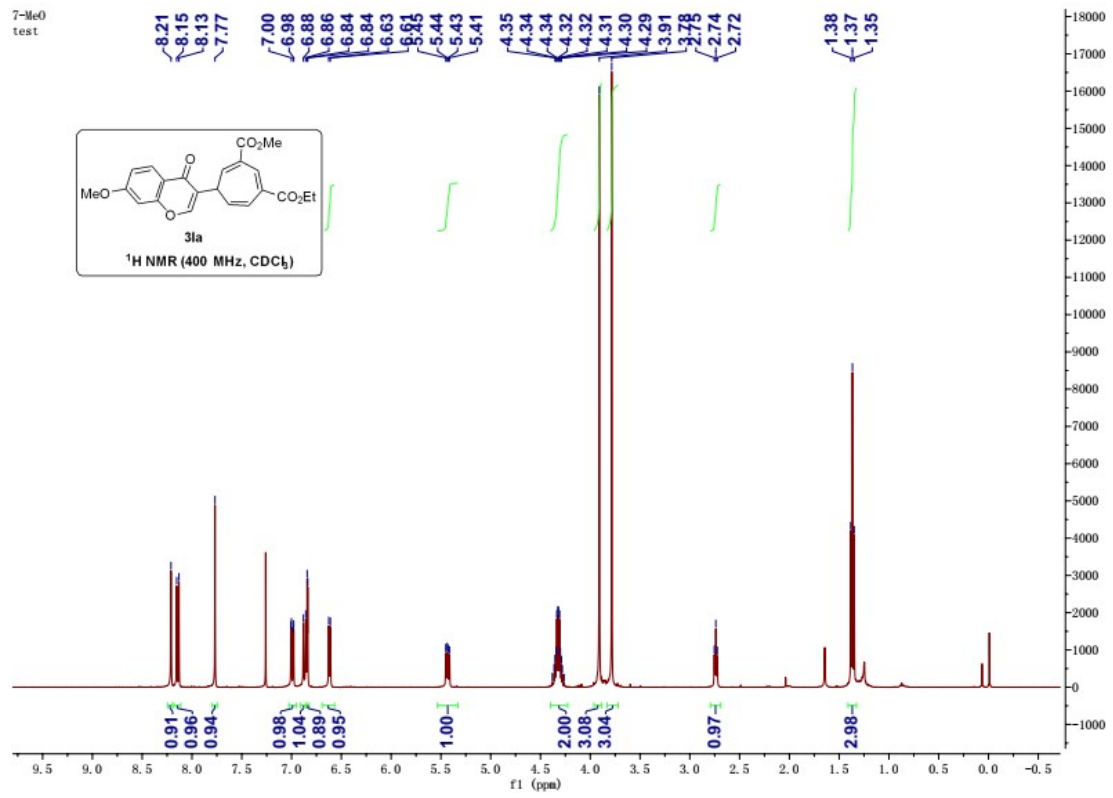

7-MeO  
test

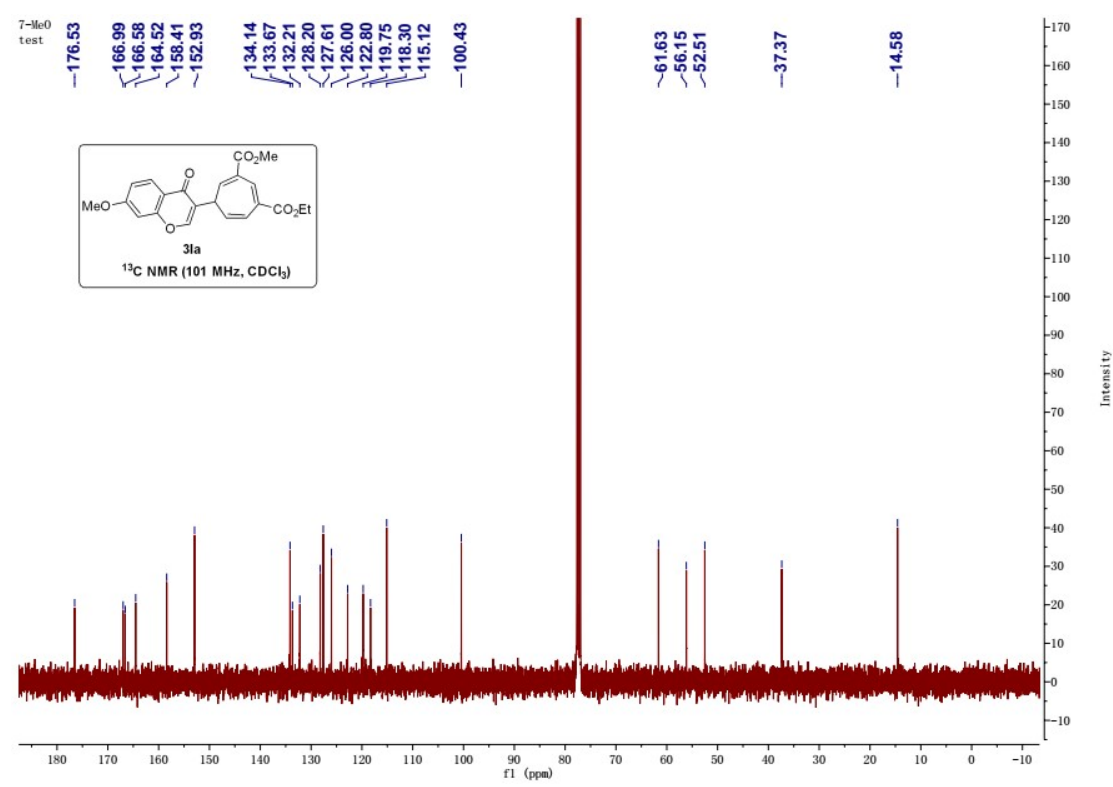



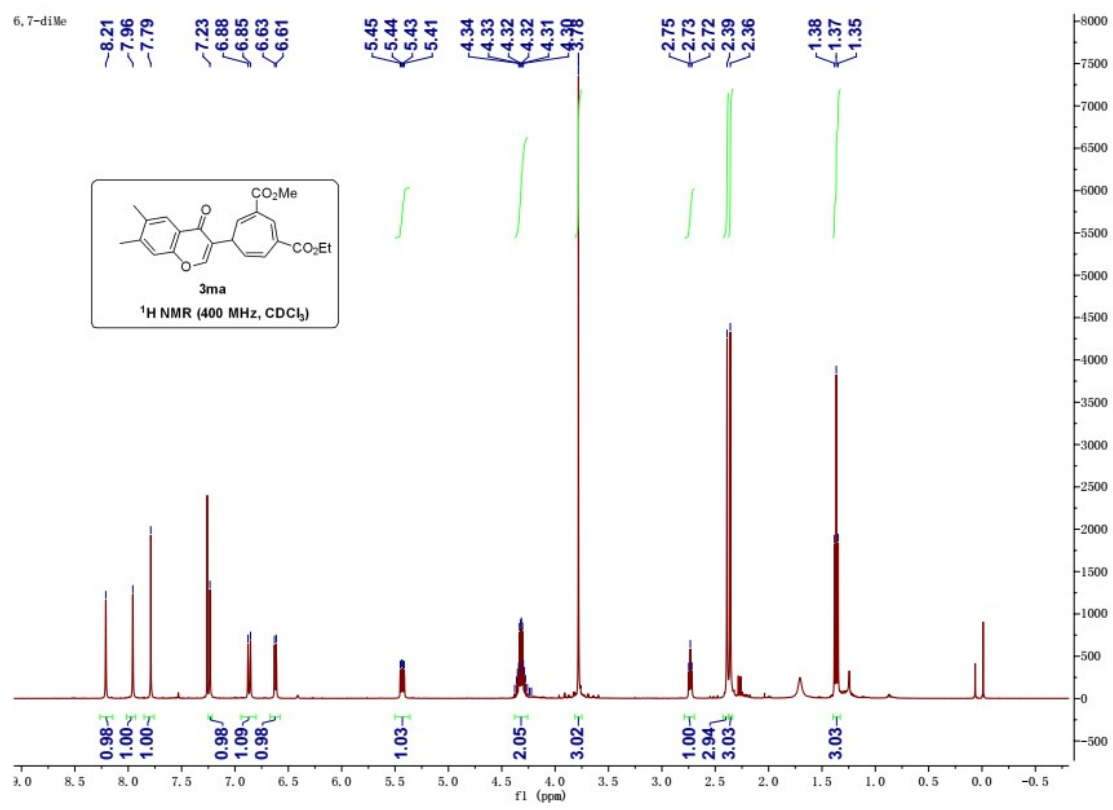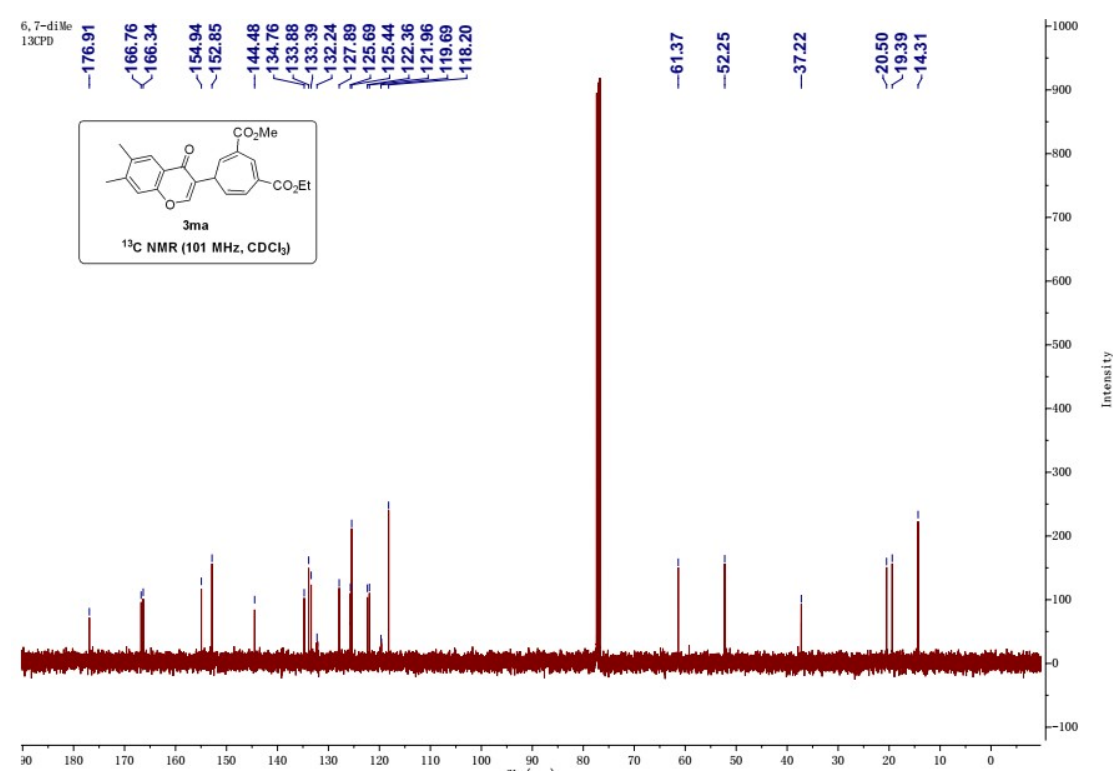

1jx-2-152  
PROTON

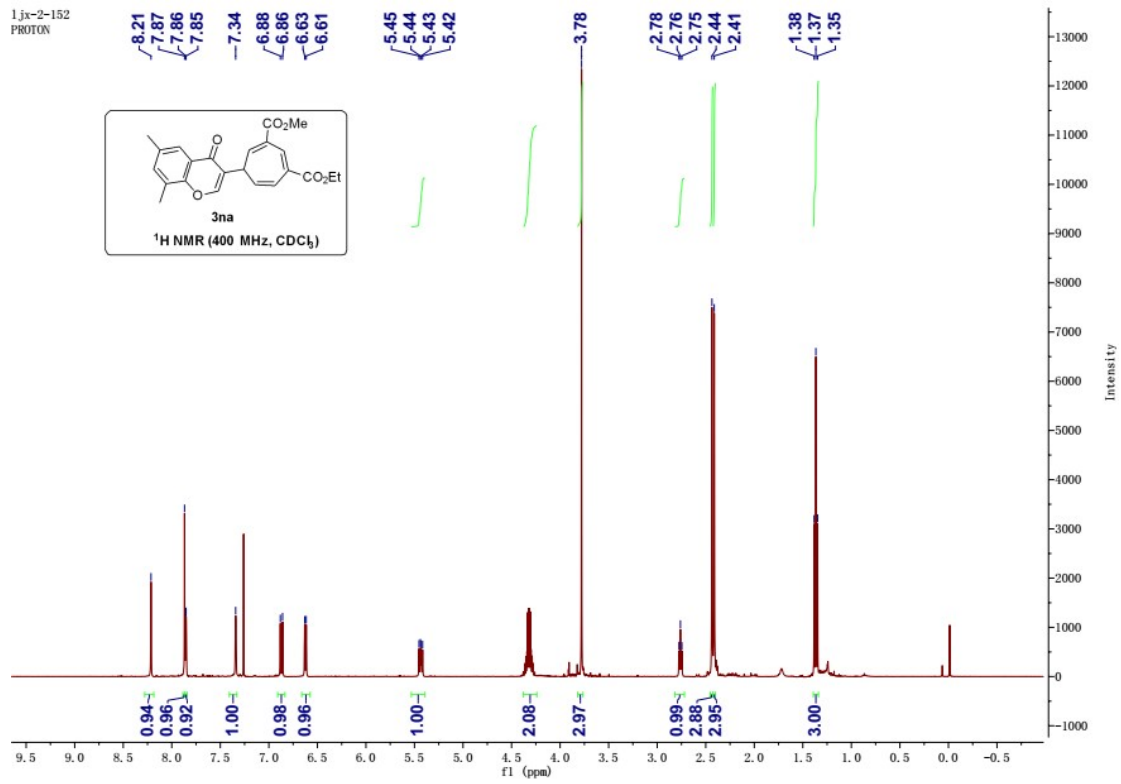

1jx-2-152  
C13CPD

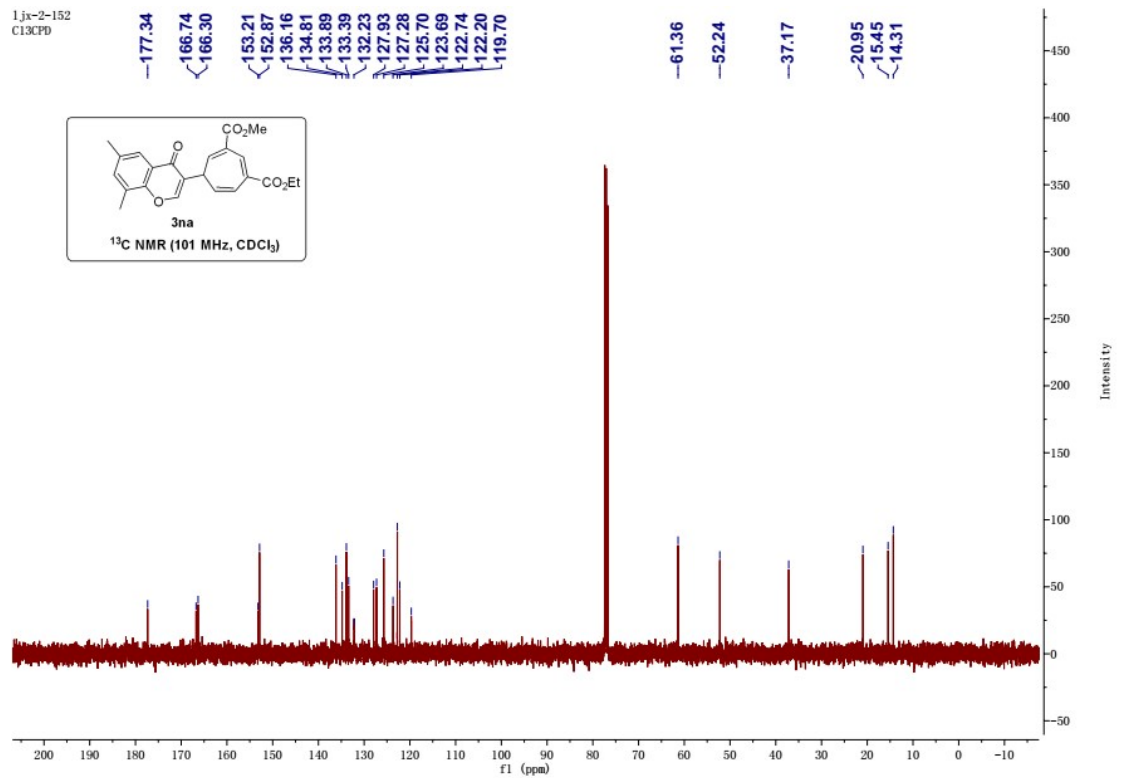

6, 8-di-Cl  
PROTON

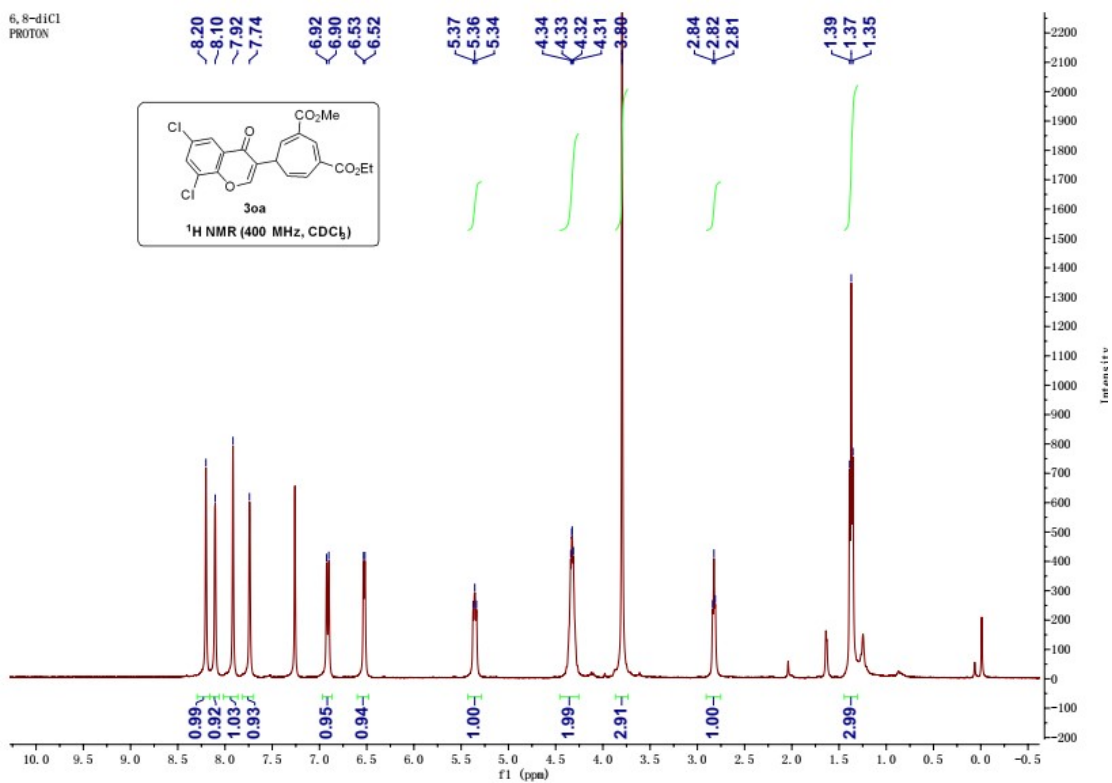

3, 5-di-Cl  
C13CPD

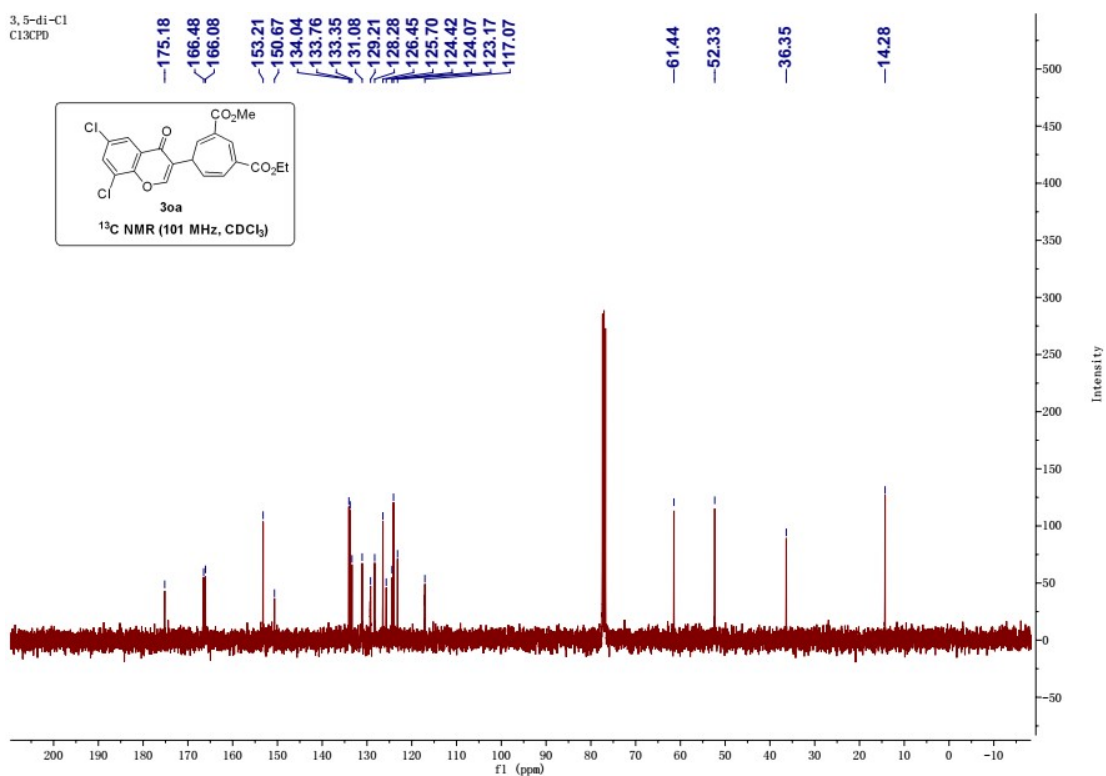

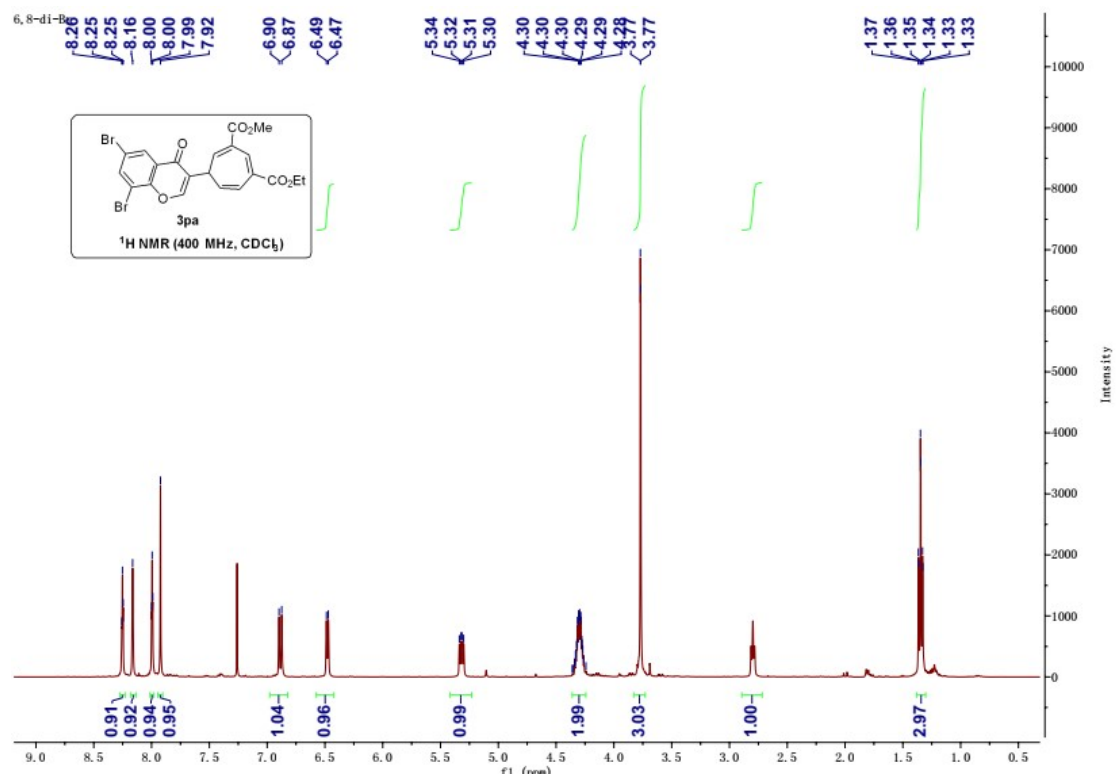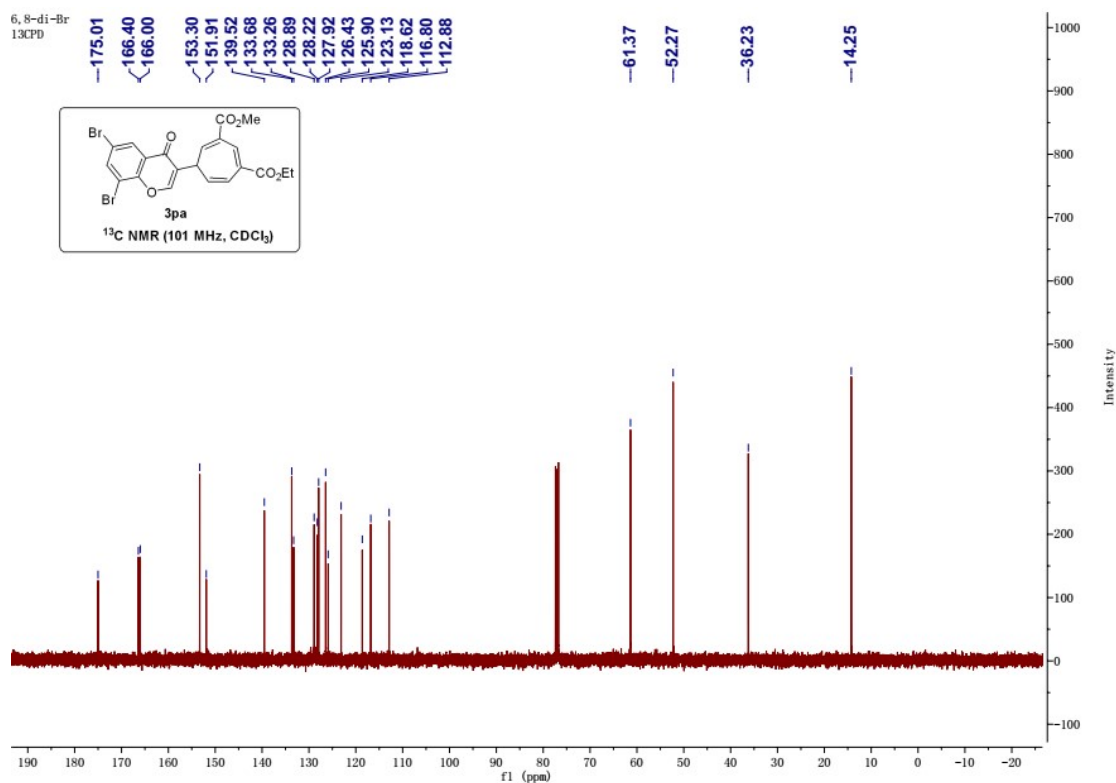

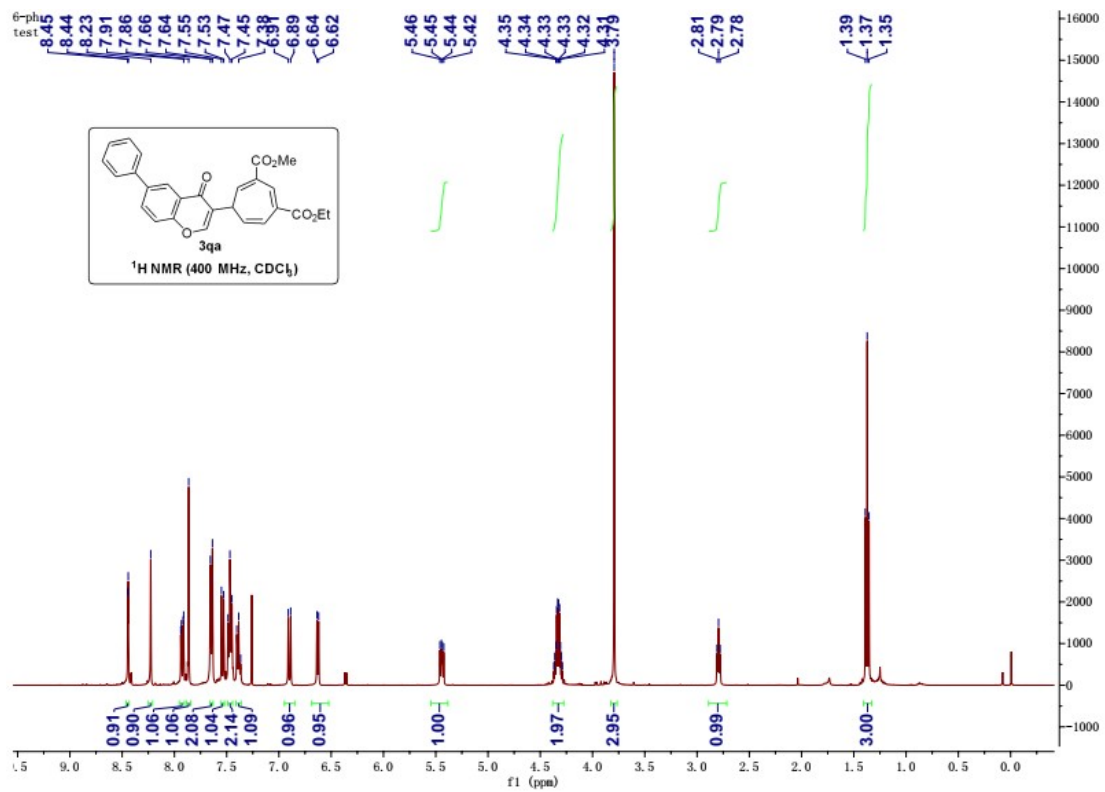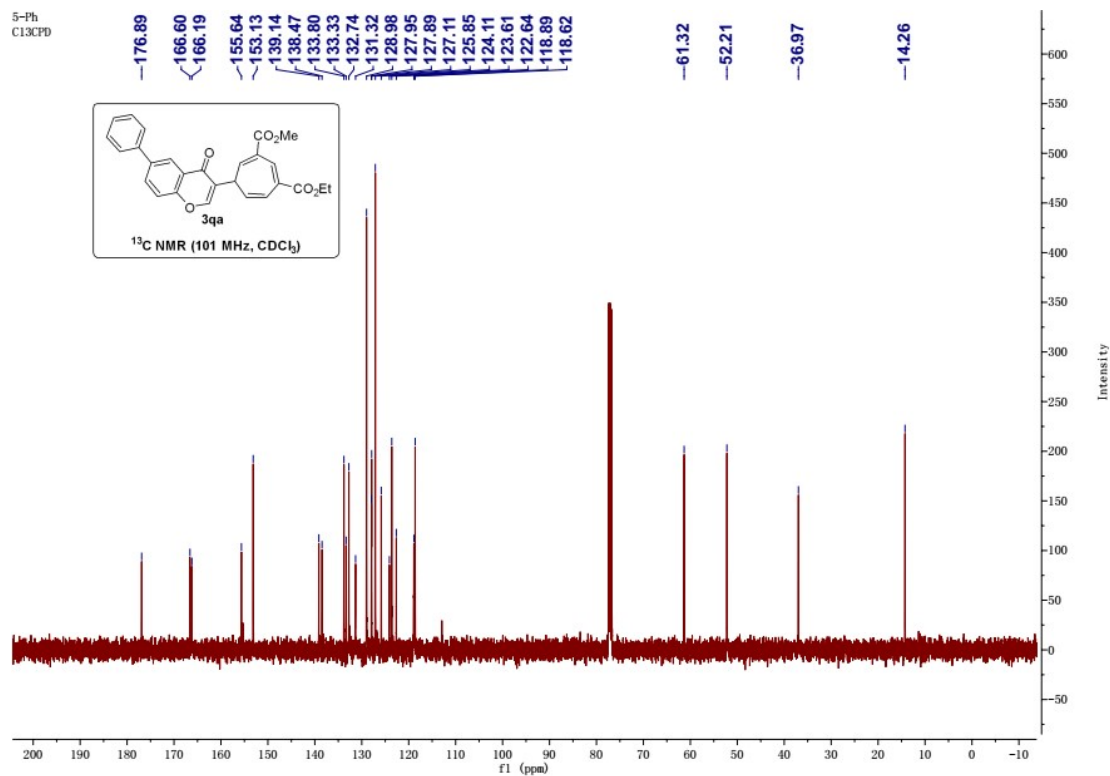

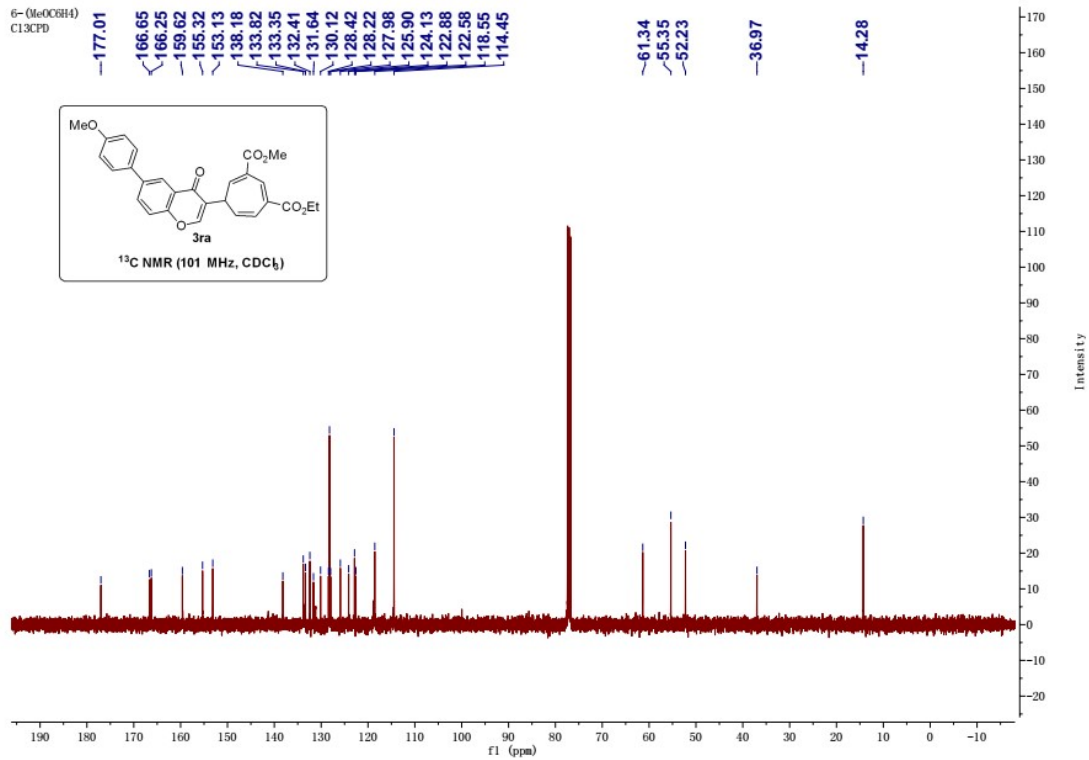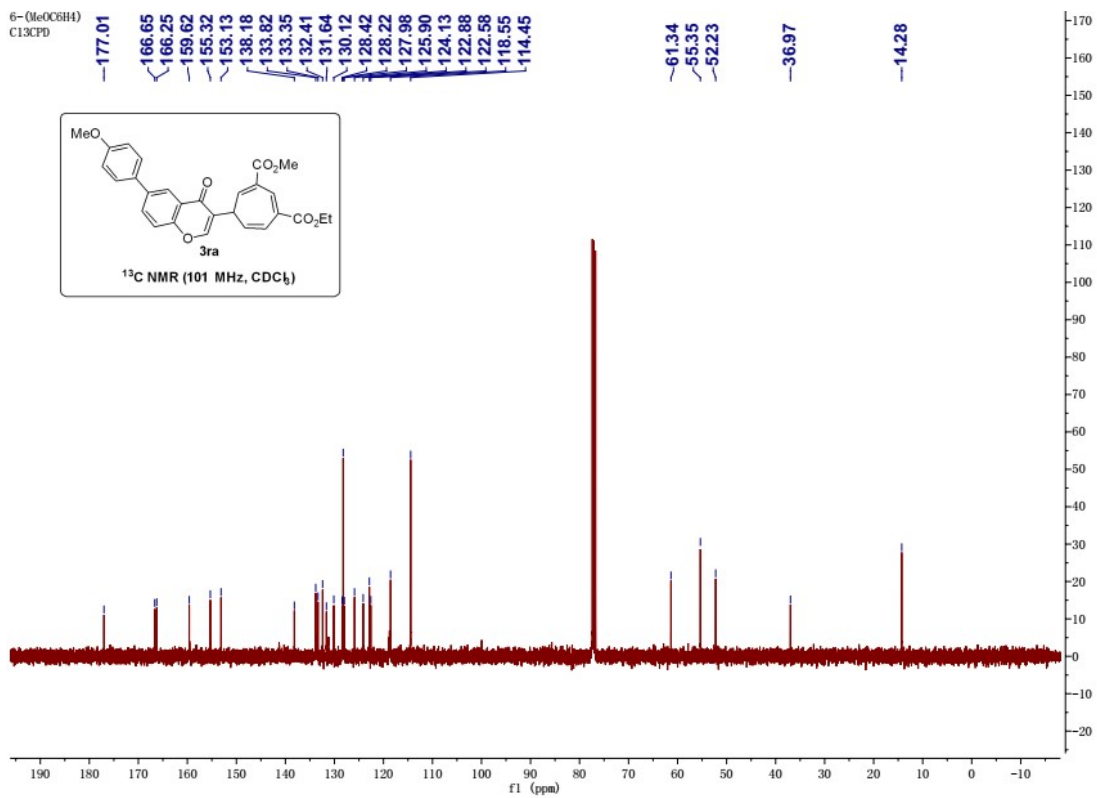

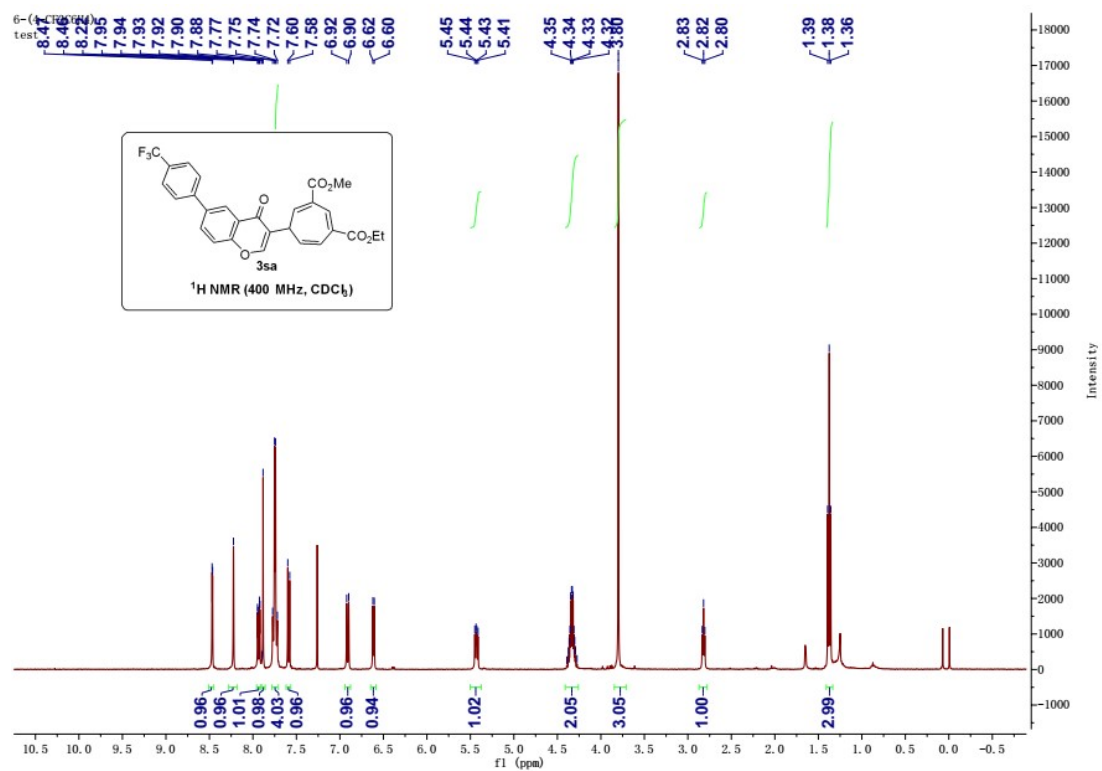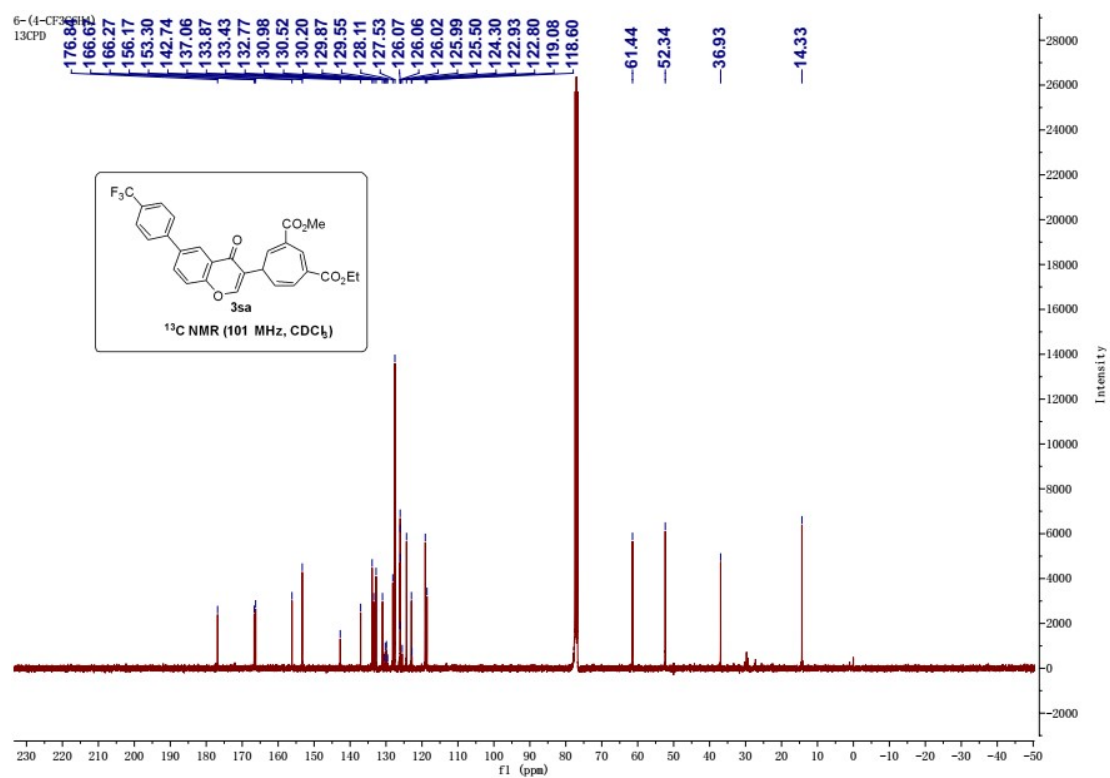

6-(4-CF<sub>3</sub>OH)  
F19CPD

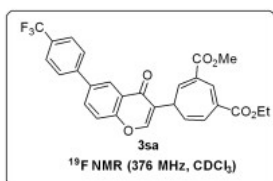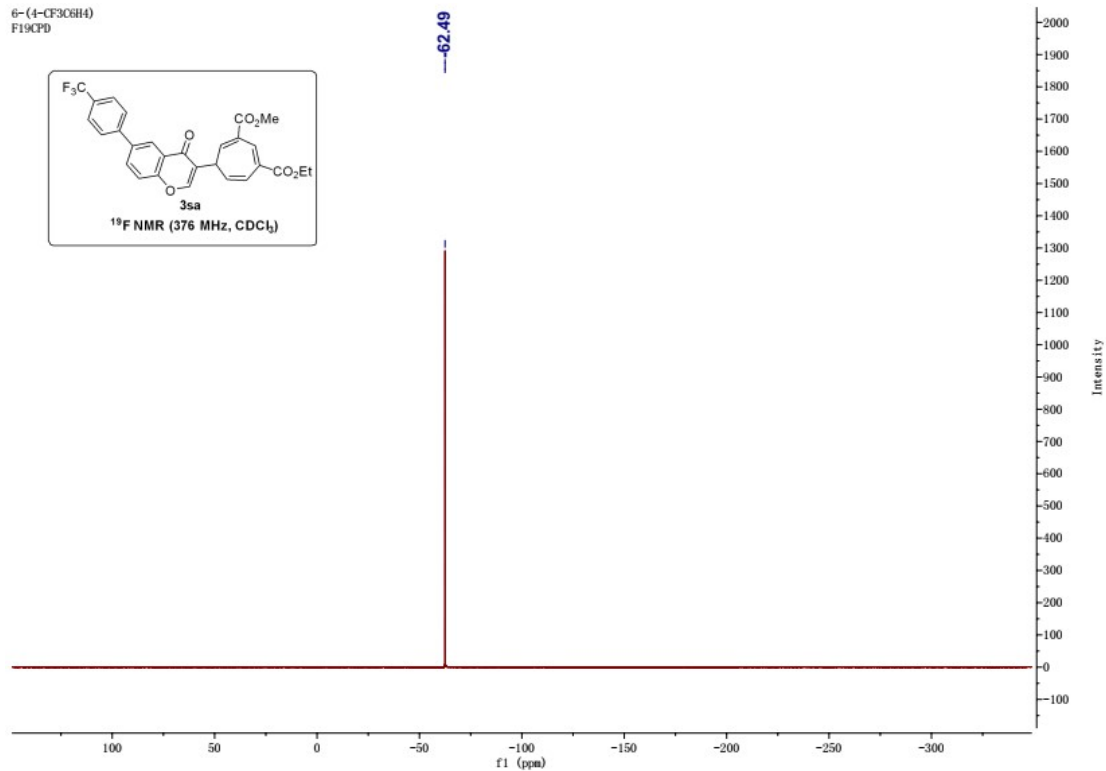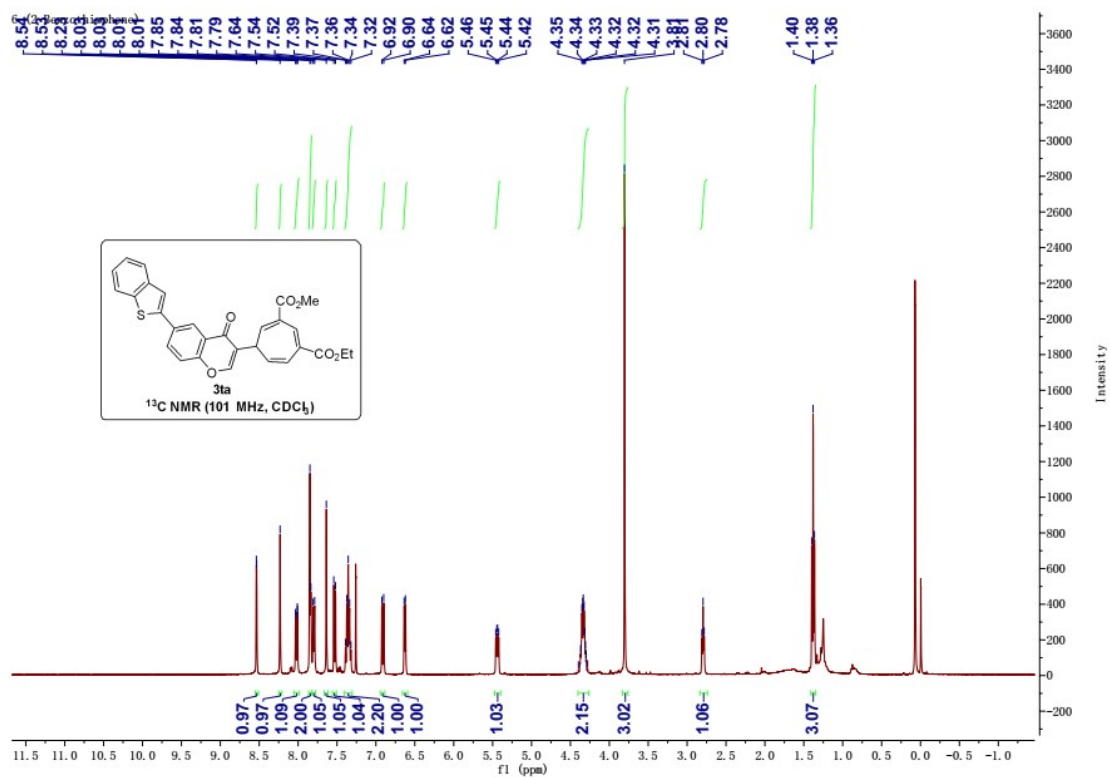



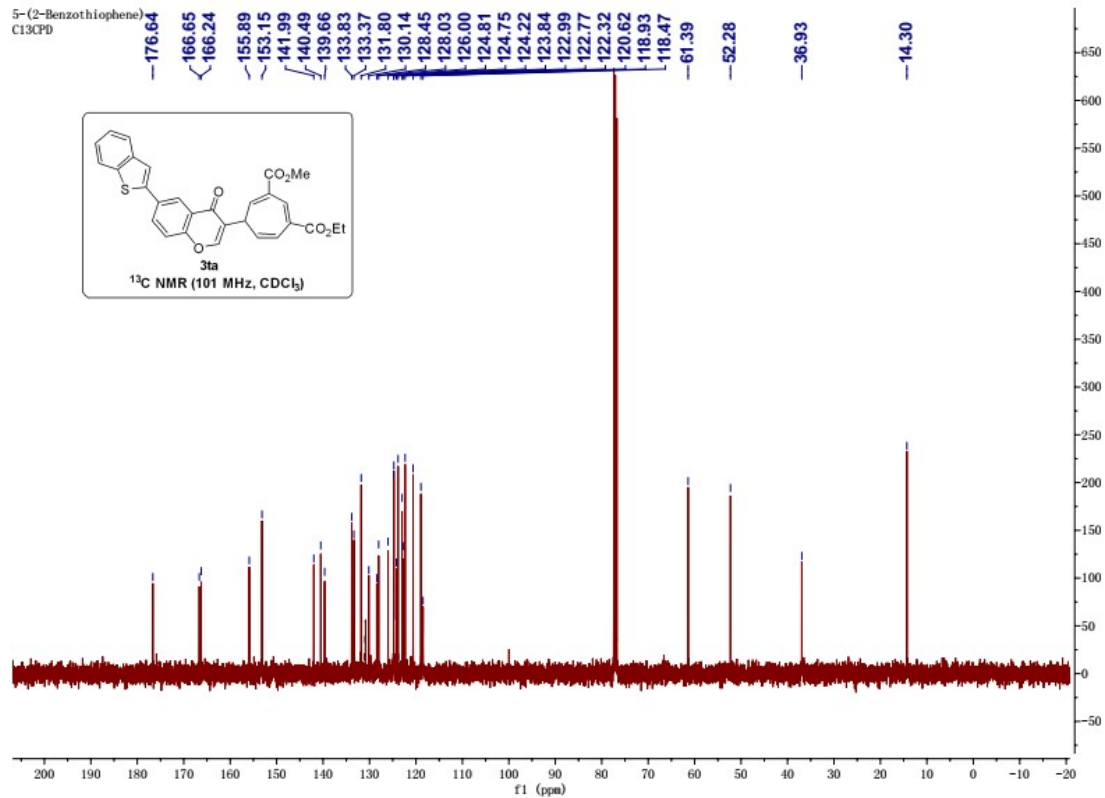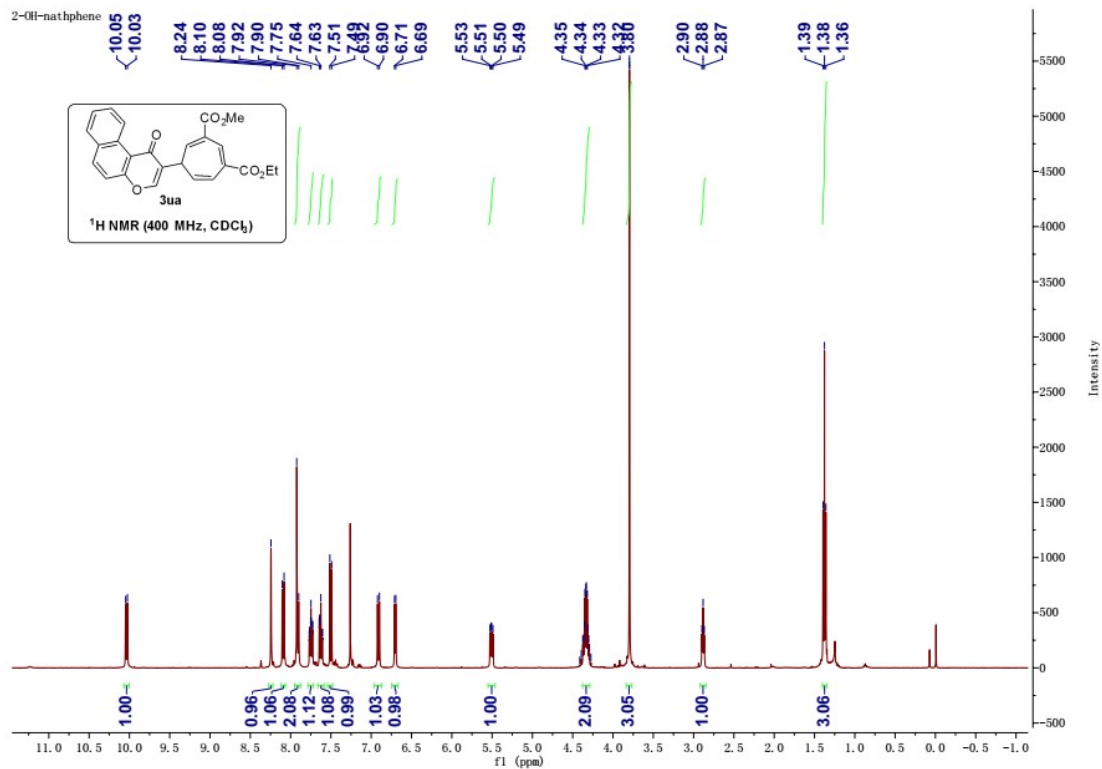

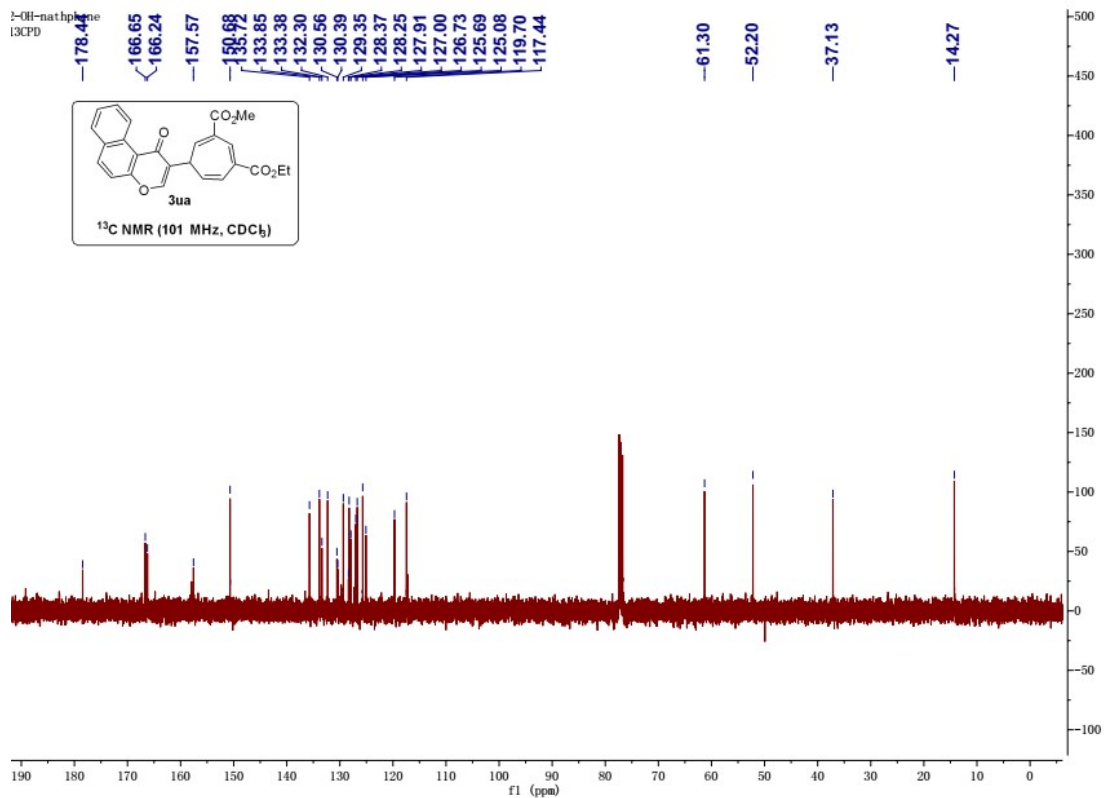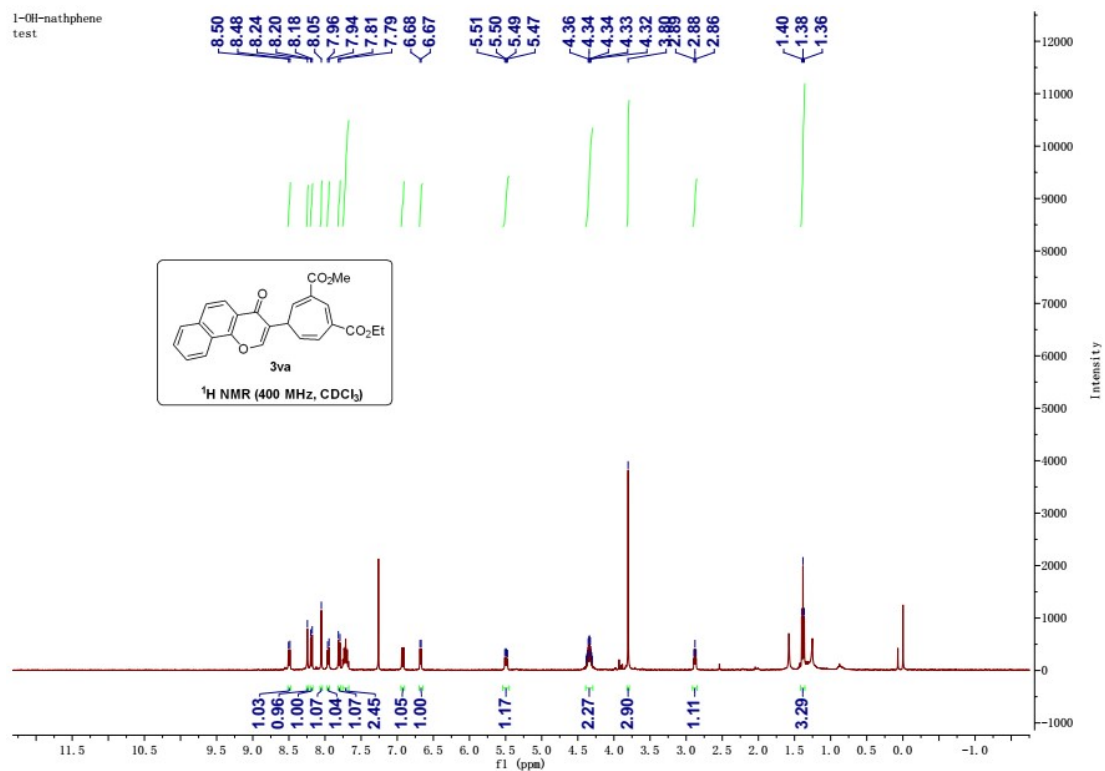

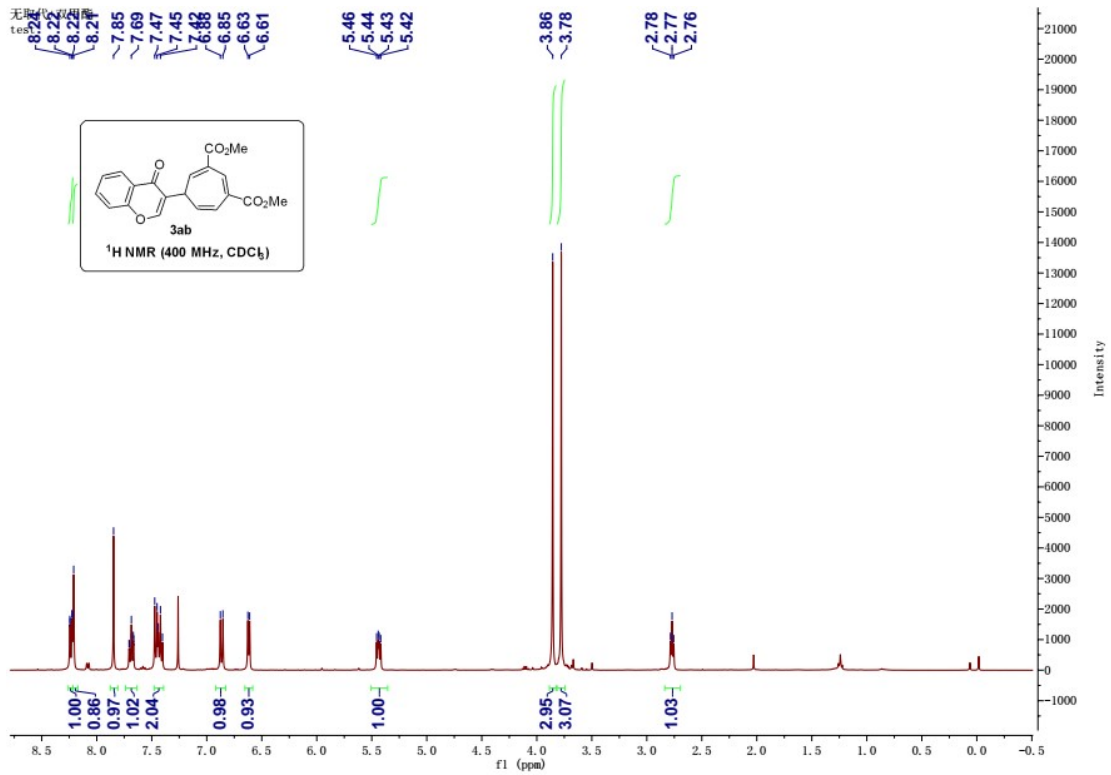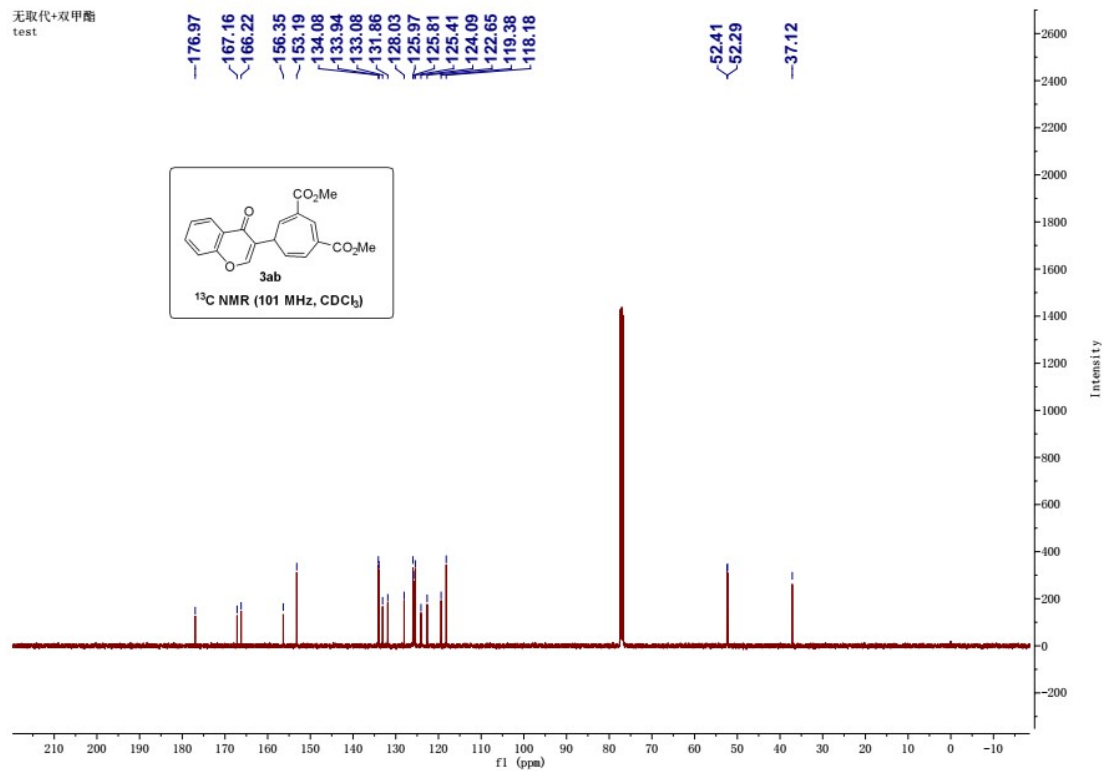

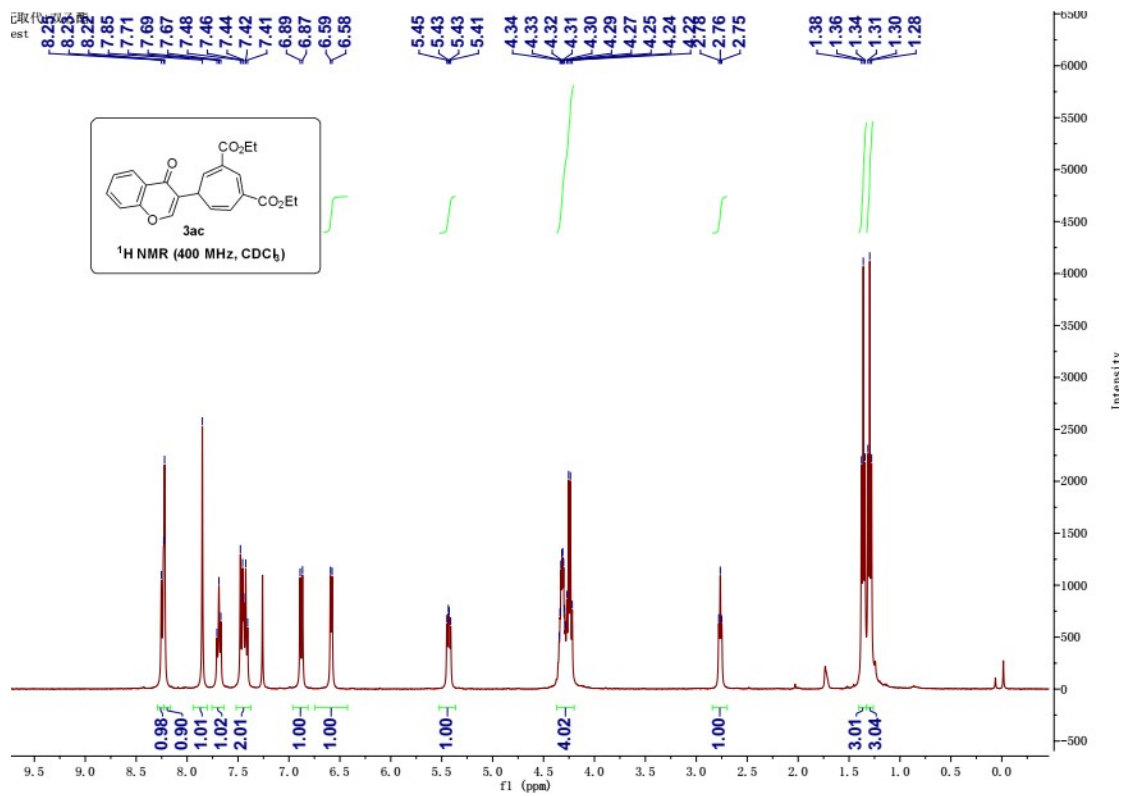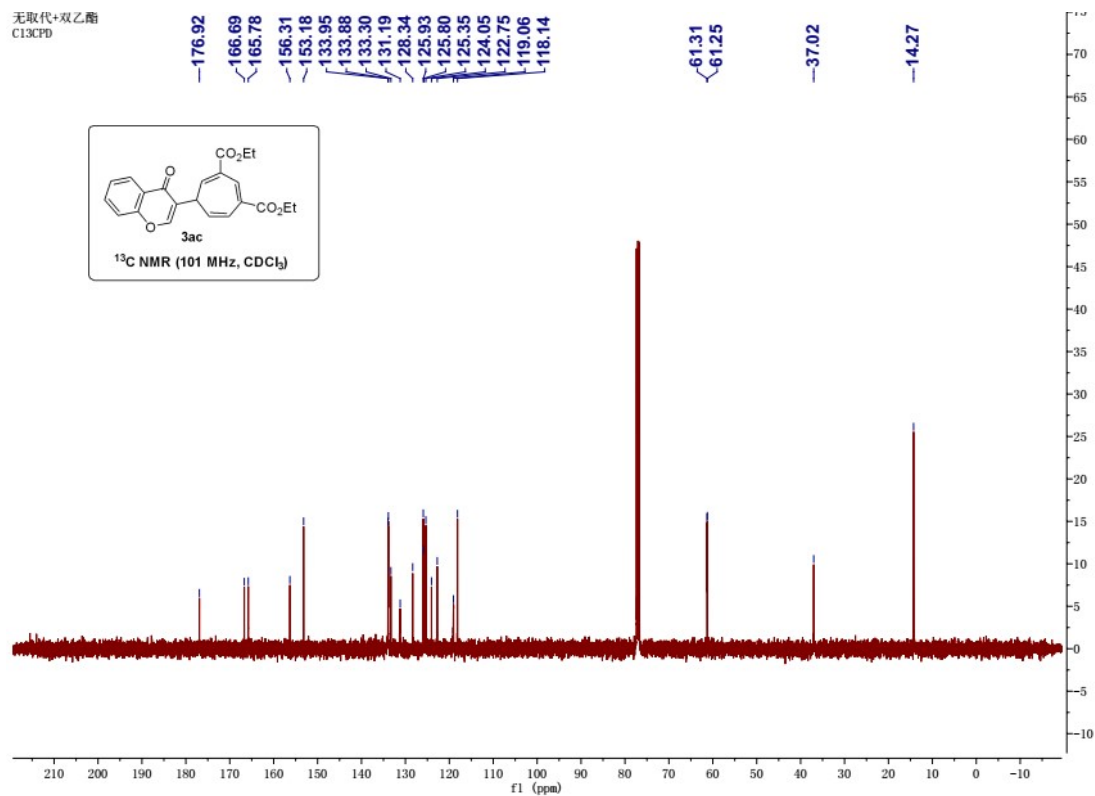

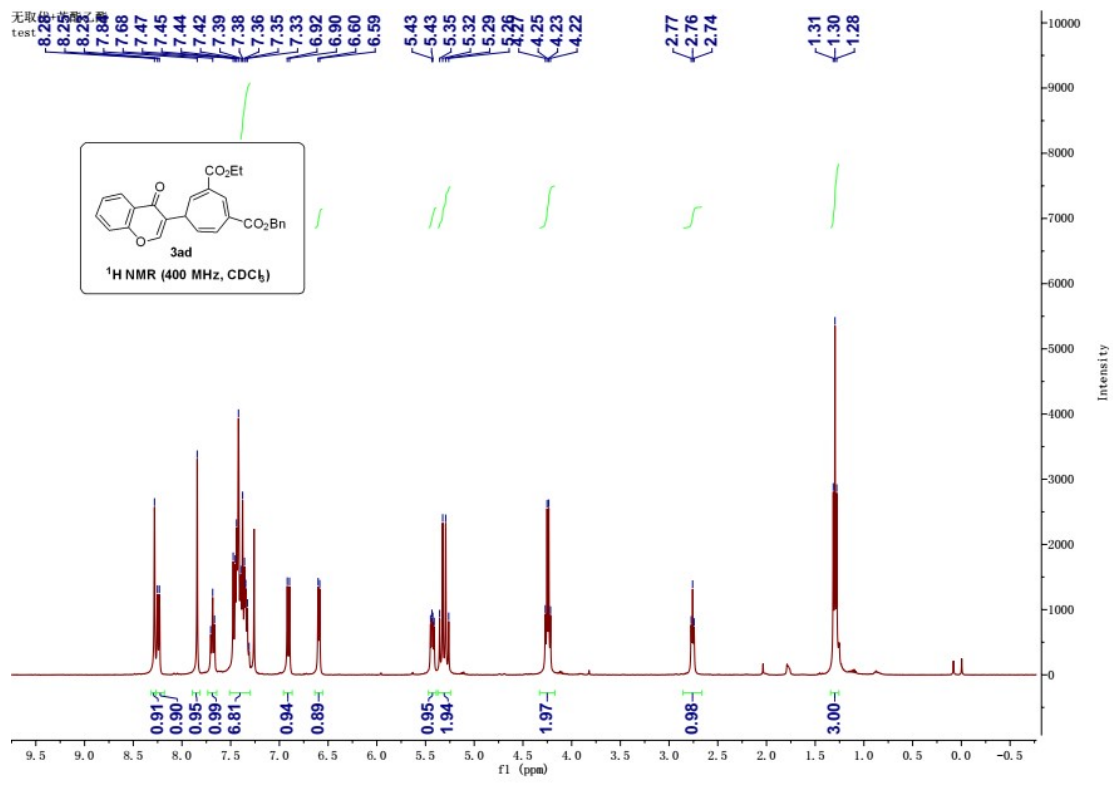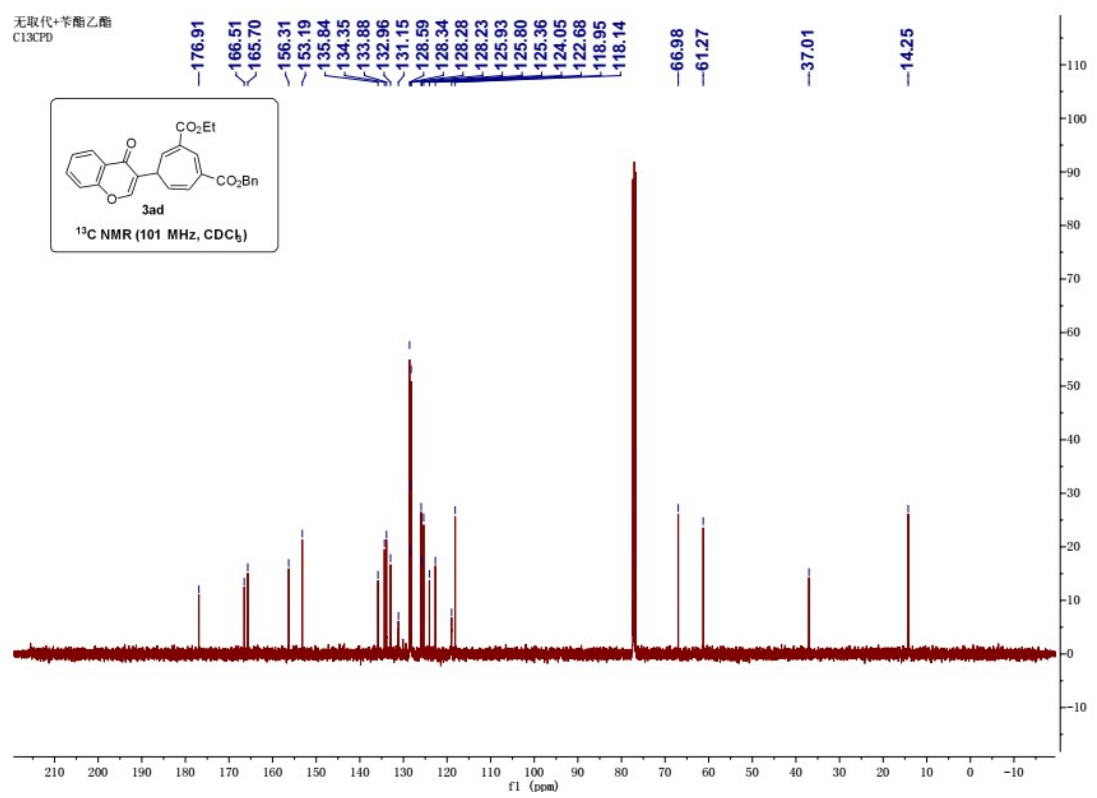

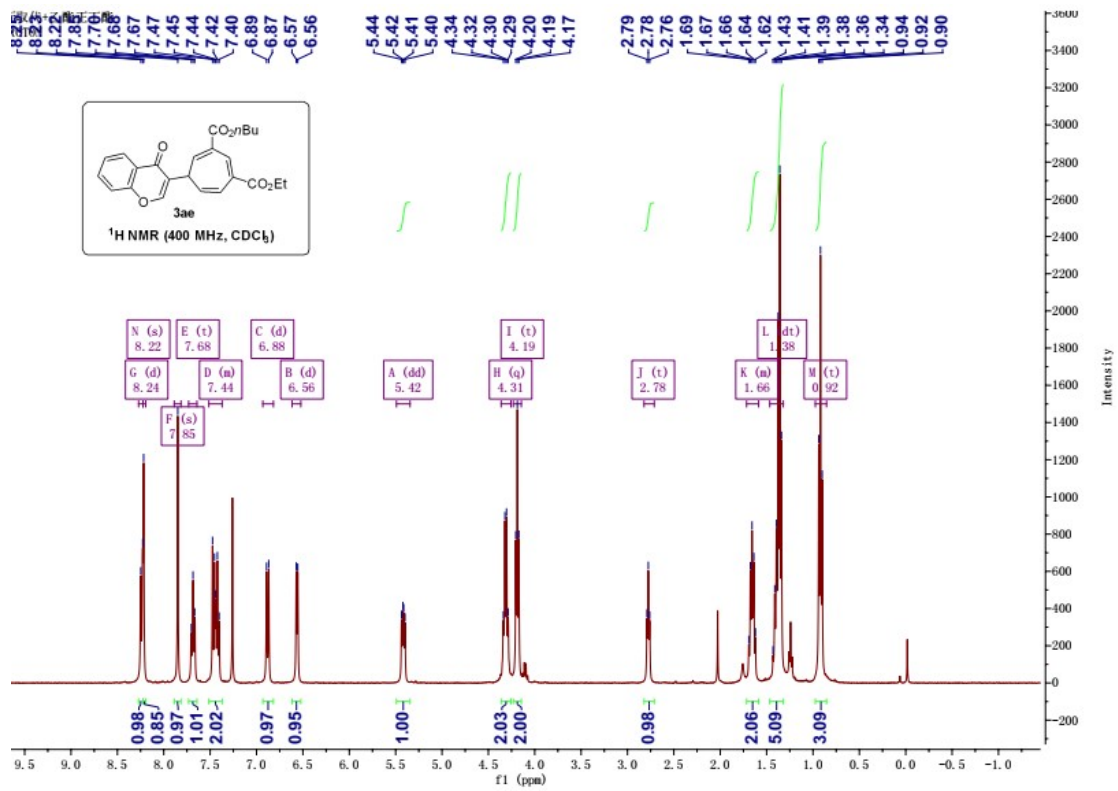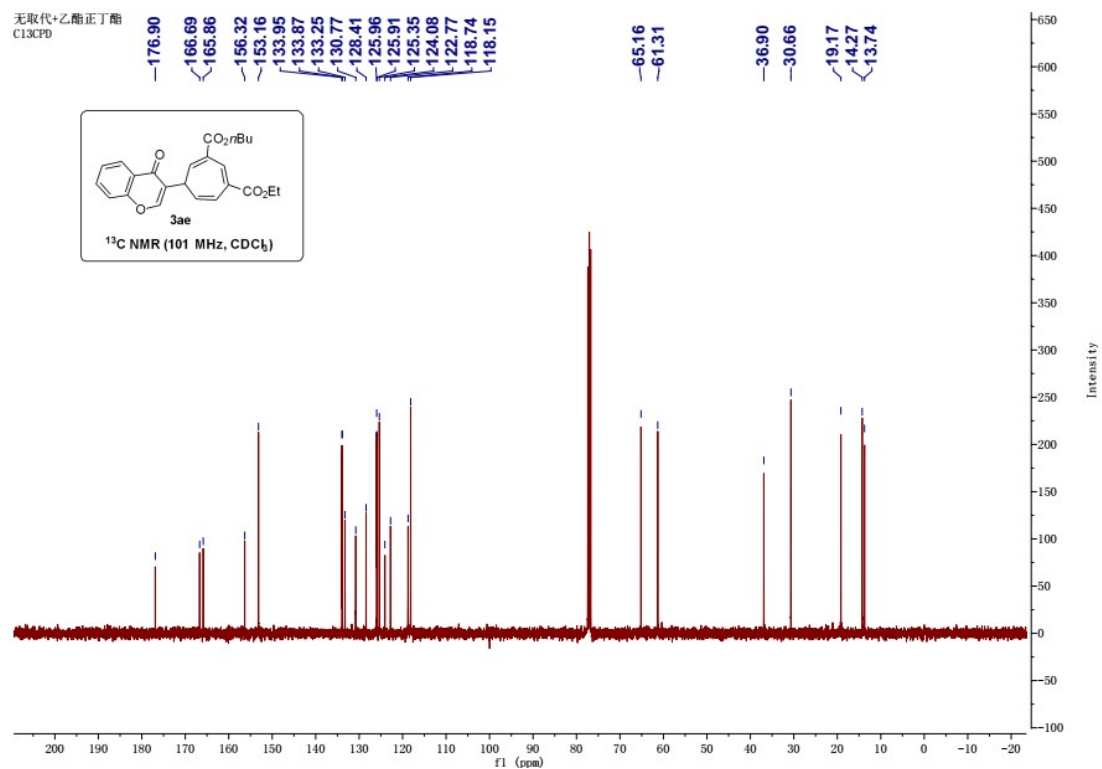

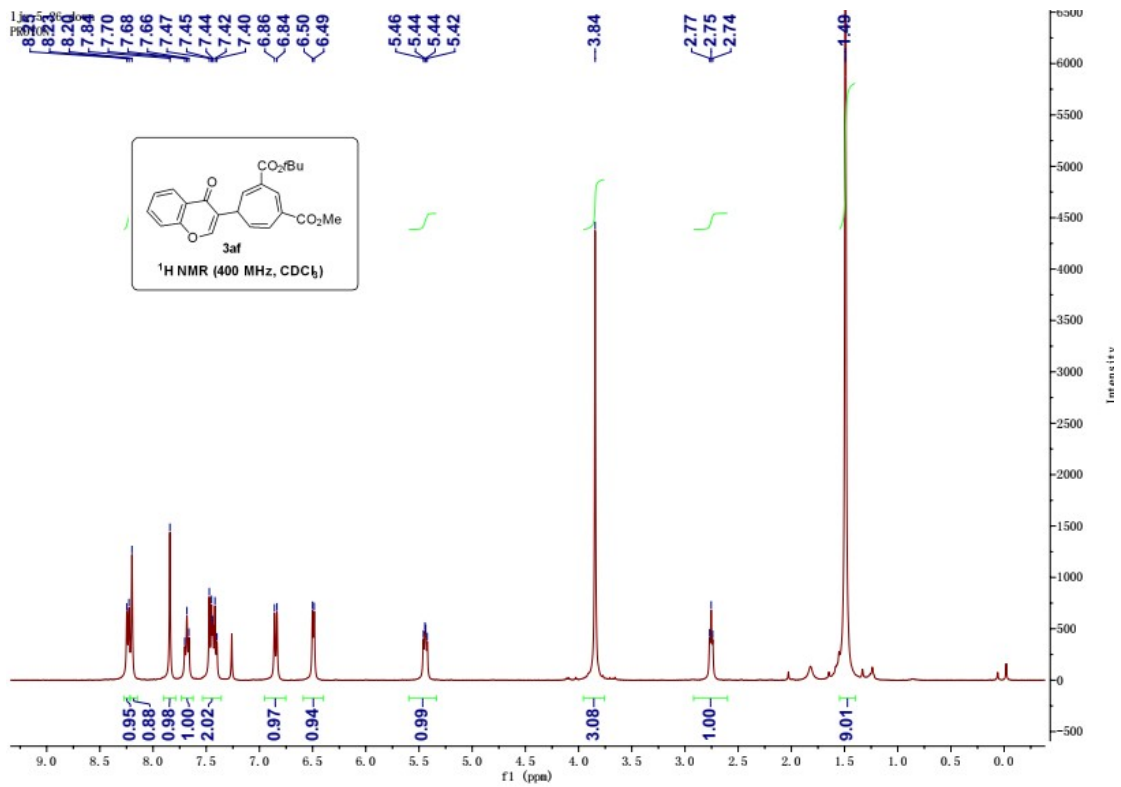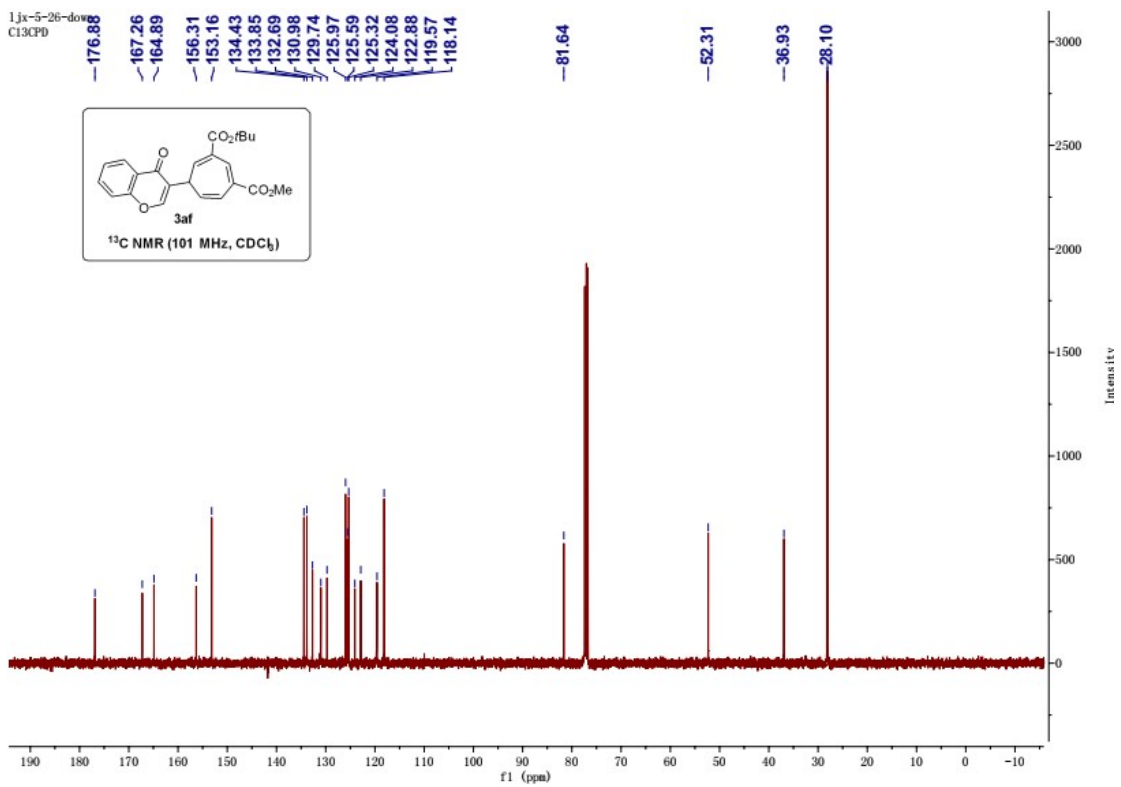



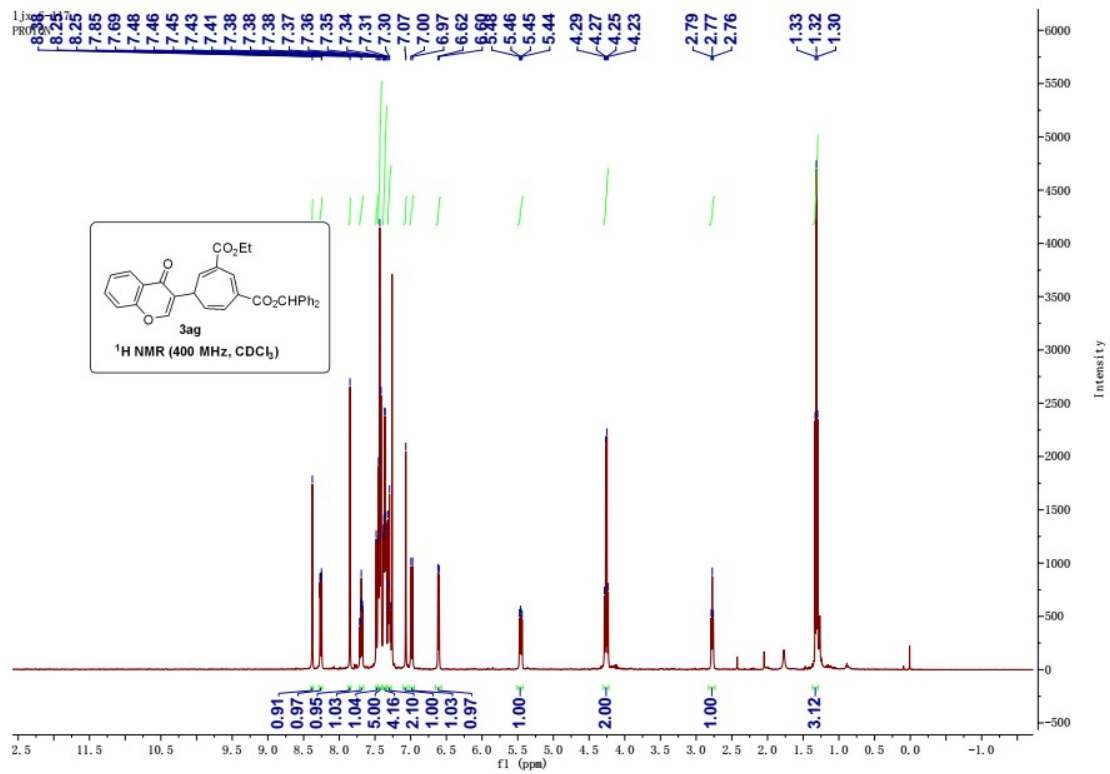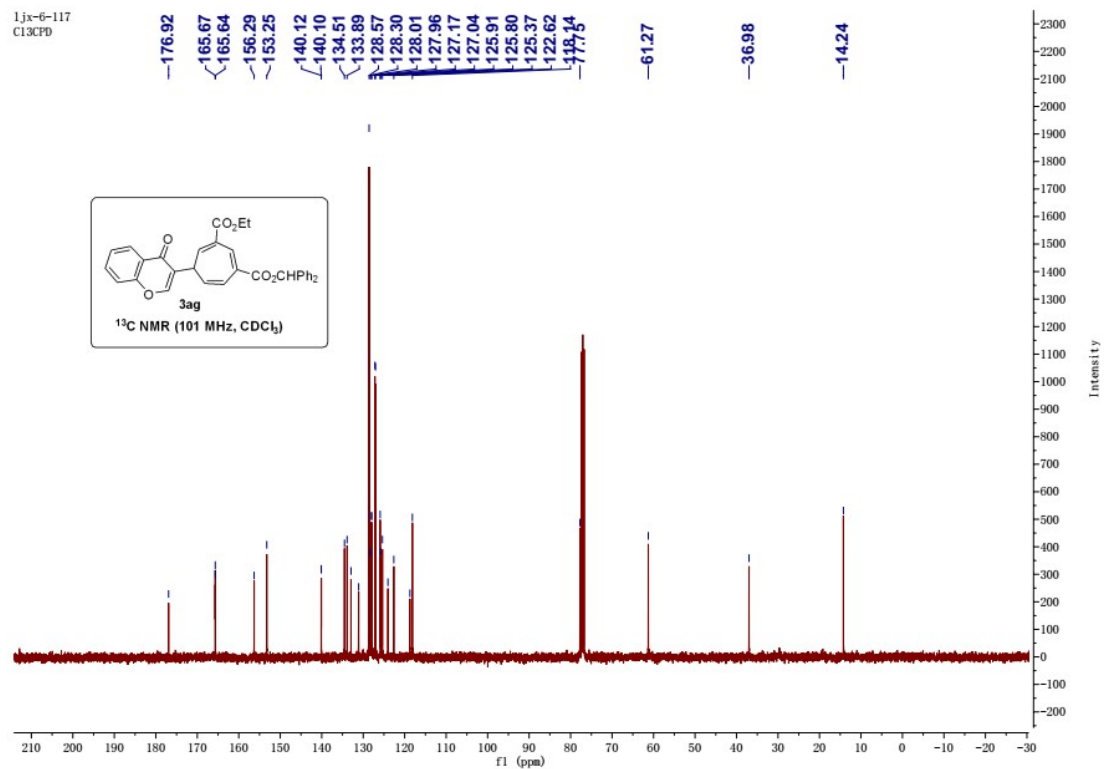



1jx-10-98  
1110-DY  
0

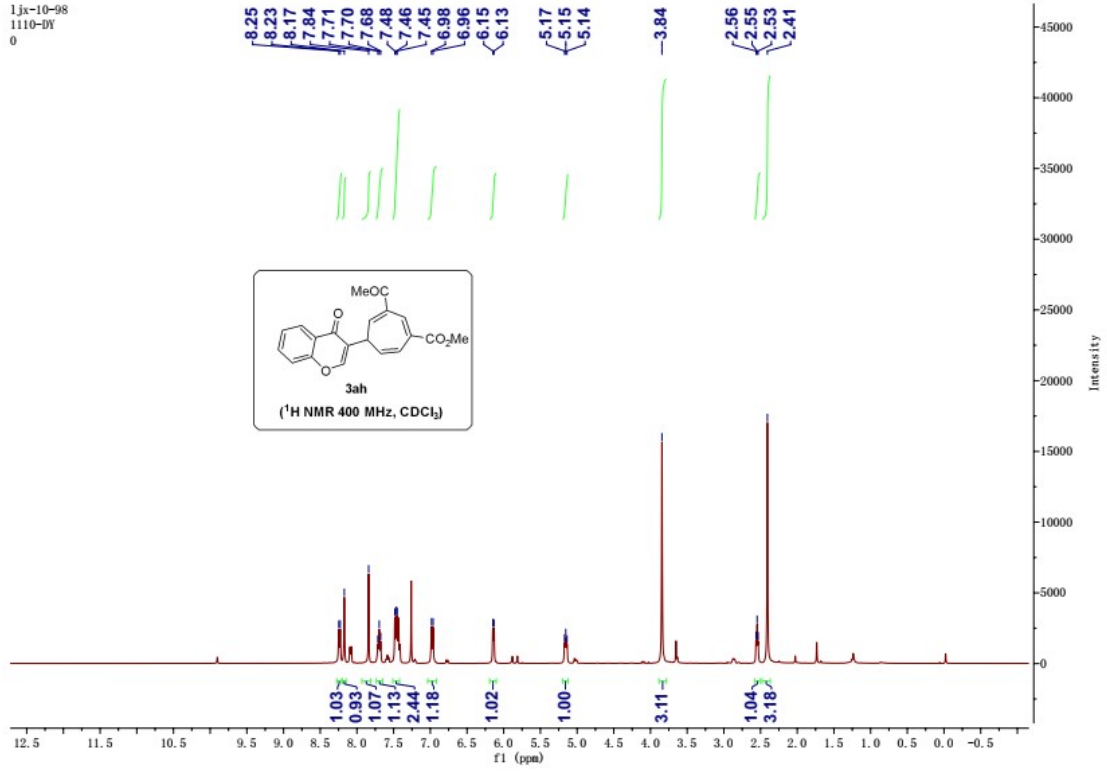

1jx-10-98  
13CPD

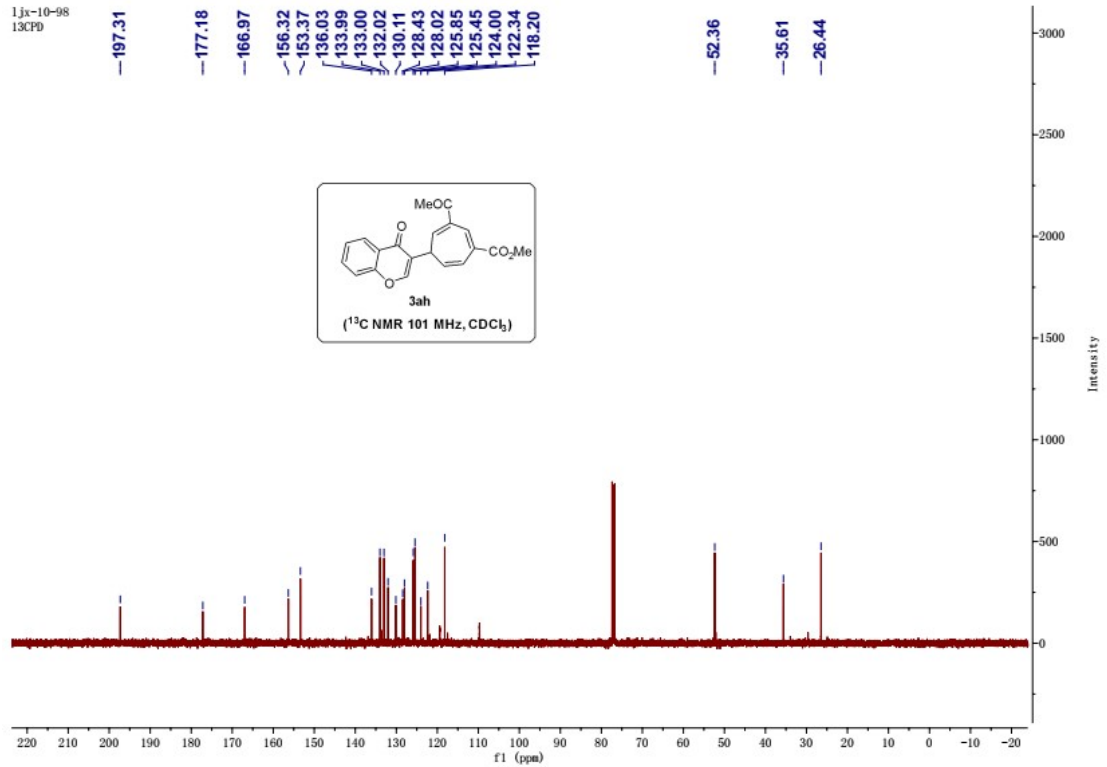

## 10. X-Ray Crystallography Data of 3sa

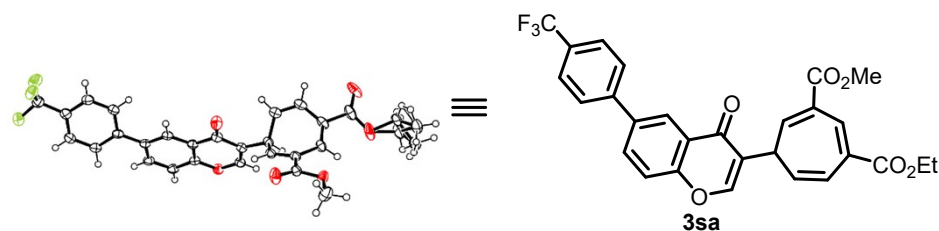

Figure S2. ORTEP diagram of **3sa** (CCDC: 2008499). Thermal ellipsoids are shown at the 50% probability level. A colorless block crystal of **3sa** for X-ray diffraction was obtained by slowly volatilizing a solution of **3sa** in hexane/ ethyl acetate (5:1). The X-ray intensity data was measured on a Rigaku 007 Saturn 70 single crystal diffractometer.

**Table S3 Crystal data and structure refinement for 3sa.**

|                                             |                                                               |
|---------------------------------------------|---------------------------------------------------------------|
| Identification code                         | 3sa                                                           |
| Empirical formula                           | C <sub>28</sub> H <sub>21</sub> F <sub>3</sub> O <sub>6</sub> |
| Formula weight                              | 510.45                                                        |
| Temperature/K                               | 113.15                                                        |
| Crystal system                              | monoclinic                                                    |
| Space group                                 | P2 <sub>1</sub> /c                                            |
| a/Å                                         | 15.8322(6)                                                    |
| b/Å                                         | 13.7887(4)                                                    |
| c/Å                                         | 10.6237(4)                                                    |
| α/°                                         | 90                                                            |
| β/°                                         | 92.720(4)                                                     |
| γ/°                                         | 90                                                            |
| Volume/Å <sup>3</sup>                       | 2316.60(14)                                                   |
| Z                                           | 4                                                             |
| ρ <sub>calc</sub> /cm <sup>3</sup>          | 1.464                                                         |
| μ/mm <sup>-1</sup>                          | 0.118                                                         |
| F(000)                                      | 1056.0                                                        |
| Crystal size/mm <sup>3</sup>                | 0.2 × 0.18 × 0.14                                             |
| Radiation                                   | MoKα (λ = 0.71073)                                            |
| 2θ range for data collection/°              | 3.918 to 52.736                                               |
| Index ranges                                | -19 ≤ h ≤ 19, -17 ≤ k ≤ 17, -13 ≤ l ≤ 13                      |
| Reflections collected                       | 24452                                                         |
| Independent reflections                     | 4734 [R <sub>int</sub> = 0.0453, R <sub>sigma</sub> = 0.0289] |
| Data/restraints/parameters                  | 4734/64/356                                                   |
| Goodness-of-fit on F <sup>2</sup>           | 1.048                                                         |
| Final R indexes [I ≥ 2σ (I)]                | R <sub>1</sub> = 0.0485, wR <sub>2</sub> = 0.1189             |
| Final R indexes [all data]                  | R <sub>1</sub> = 0.0583, wR <sub>2</sub> = 0.1281             |
| Largest diff. peak/hole / e Å <sup>-3</sup> | 0.45/-0.53                                                    |

## 11. References

- [1] J. R. Zimmerman, O. JohnTony, D. Steigerwald, C. Criss, B. J. Myers, D. H. Kinder, *Org. Lett.* 2015, **17**, 3256.
- [2] J.-Y. Dong, X.-C. Wang, Z. Wang, H.-J. Song, Y.-X. Liu, Q.-M. Wang, *Chem Sci* 2019, **11**, 1026.
- [3] X.-F. Zhu, J. Lan, O. Kwon, *J. Am. Chem. Soc.* 2003, **125**, 4716.
